# Supplementary material for: Pan-cancer analysis identifies LMNB1 as a target to redress Th1/Th2 imbalance and enhance PARP inhibitor response in human cancers
Source: Cancer Cell Int. 2022 Mar 3;22:101. doi: 10.1186/s12935-022-02467-4 (PMC8896121; doi:10.1186/s12935-022-02467-4)
Supplement: Supplementary file 3 — Additional file 3: Table S3. GESA with HALLMARK gene sets of PRAD cohort in TCGA. [file 12935_2022_2467_MOESM3_ESM.xlsx]

## Sheet: GESA_HALLMARK
Table S3: GESA with HALLMARK gene sets of PRAD corhort in TCGA
GS	SIZE	ES	NES	NOM p-val	FDR q-val	FWER p-val	RANK AT MAX	LEADING EDGE
HALLMARK_G2M_CHECKPOINT	189	0.779892	2.19284	0	0.0111765	0.003	2649	tags=76%, list=13%, signal=87%
HALLMARK_E2F_TARGETS	195	0.814455	2.15737	0	0.00740108	0.005	1966	tags=79%, list=10%, signal=87%
HALLMARK_MYC_TARGETS_V1	194	0.708252	1.92336	0	0.0435157	0.058	3872	tags=73%, list=20%, signal=90%
HALLMARK_SPERMATOGENESIS	133	0.443106	1.80339	0.00500835	0.0982351	0.161	5853	tags=34%, list=30%, signal=48%
HALLMARK_MITOTIC_SPINDLE	198	0.599498	1.79624	0	0.0840966	0.17	5235	tags=63%, list=27%, signal=85%
HALLMARK_MYC_TARGETS_V2	58	0.692735	1.78018	0.0248566	0.0803232	0.186	2985	tags=66%, list=15%, signal=77%
HALLMARK_DNA_REPAIR	148	0.55122	1.77746	0.00559702	0.0697956	0.187	4619	tags=48%, list=23%, signal=62%
HALLMARK_MTORC1_SIGNALING	195	0.544728	1.73444	0.0148423	0.0887367	0.252	5634	tags=59%, list=29%, signal=82%
HALLMARK_PI3K_AKT_MTOR_SIGNALING	104	0.507691	1.69764	0.00558659	0.104254	0.308	6013	tags=55%, list=30%, signal=78%
HALLMARK_UNFOLDED_PROTEIN_RESPONSE	107	0.528446	1.63039	0.0204082	0.14216	0.401	5943	tags=54%, list=30%, signal=77%
HALLMARK_UV_RESPONSE_UP	154	0.396264	1.5073	0.0461812	0.261032	0.593	6277	tags=40%, list=32%, signal=59%
HALLMARK_GLYCOLYSIS	198	0.388959	1.43435	0.0935252	0.341776	0.677	7404	tags=44%, list=37%, signal=70%
HALLMARK_HEME_METABOLISM	192	0.375669	1.38343	0.0917603	0.396078	0.725	8465	tags=52%, list=43%, signal=89%
HALLMARK_ALLOGRAFT_REJECTION	195	0.454711	1.32386	0.264188	0.466971	0.782	7563	tags=58%, list=38%, signal=94%
HALLMARK_PROTEIN_SECRETION	95	0.492779	1.31398	0.216216	0.456603	0.794	7027	tags=65%, list=36%, signal=101%
HALLMARK_WNT_BETA_CATENIN_SIGNALING	42	0.424726	1.30247	0.182836	0.443983	0.8	7629	tags=52%, list=39%, signal=85%
HALLMARK_PEROXISOME	104	0.364547	1.26641	0.184919	0.478472	0.824	6845	tags=40%, list=35%, signal=61%
HALLMARK_TGF_BETA_SIGNALING	54	0.410307	1.18674	0.310606	0.59369	0.871	7797	tags=57%, list=39%, signal=95%
HALLMARK_INTERFERON_GAMMA_RESPONSE	198	0.407427	1.18431	0.314629	0.567071	0.871	9267	tags=66%, list=47%, signal=123%
HALLMARK_IL2_STAT5_SIGNALING	195	0.334778	1.17373	0.277883	0.557542	0.873	8558	tags=49%, list=43%, signal=86%
HALLMARK_OXIDATIVE_PHOSPHORYLATION	184	0.409148	1.13989	0.374525	0.58771	0.891	5063	tags=36%, list=26%, signal=49%
HALLMARK_ADIPOGENESIS	192	0.328211	1.13243	0.330869	0.572703	0.895	6226	tags=36%, list=32%, signal=52%
HALLMARK_INTERFERON_ALPHA_RESPONSE	95	0.415581	1.13223	0.386965	0.54811	0.895	9267	tags=68%, list=47%, signal=128%
HALLMARK_COMPLEMENT	200	0.306523	1.05674	0.404896	0.643917	0.919	6924	tags=37%, list=35%, signal=56%
HALLMARK_KRAS_SIGNALING_UP	194	0.30007	1.0524	0.392015	0.626703	0.922	8264	tags=43%, list=42%, signal=74%
HALLMARK_UV_RESPONSE_DN	138	0.32869	1.04727	0.433645	0.612848	0.925	8517	tags=48%, list=43%, signal=83%
HALLMARK_HEDGEHOG_SIGNALING	35	0.340473	1.04033	0.42243	0.599808	0.926	9852	tags=54%, list=50%, signal=108%
HALLMARK_INFLAMMATORY_RESPONSE	198	0.334652	1.03883	0.447014	0.579857	0.926	8596	tags=47%, list=44%, signal=82%
HALLMARK_REACTIVE_OXYGEN_SPECIES_PATHWAY	47	0.327861	1.03023	0.419417	0.572055	0.927	6102	tags=36%, list=31%, signal=52%
HALLMARK_CHOLESTEROL_HOMEOSTASIS	73	0.307725	1.01696	0.438224	0.571188	0.934	8005	tags=42%, list=41%, signal=71%
HALLMARK_P53_PATHWAY	192	0.273251	1.01603	0.426987	0.554563	0.935	4382	tags=22%, list=22%, signal=29%
HALLMARK_APOPTOSIS	159	0.294082	1.01582	0.477583	0.537656	0.935	4960	tags=24%, list=25%, signal=32%
HALLMARK_IL6_JAK_STAT3_SIGNALING	87	0.34608	1.01043	0.462745	0.527804	0.938	9664	tags=53%, list=49%, signal=103%
HALLMARK_FATTY_ACID_METABOLISM	155	0.292	1.00233	0.447653	0.522973	0.939	8418	tags=43%, list=43%, signal=75%
HALLMARK_HYPOXIA	191	0.264457	1.00014	0.472628	0.510773	0.94	9053	tags=42%, list=46%, signal=78%
HALLMARK_NOTCH_SIGNALING	32	0.31738	0.984252	0.486388	0.517368	0.947	8312	tags=44%, list=42%, signal=75%
HALLMARK_ANDROGEN_RESPONSE	96	0.335064	0.978489	0.509398	0.509579	0.947	9073	tags=56%, list=46%, signal=104%
HALLMARK_ANGIOGENESIS	36	0.314603	0.951868	0.482505	0.529803	0.953	7173	tags=31%, list=36%, signal=48%
HALLMARK_PANCREAS_BETA_CELLS	40	0.273273	0.911628	0.546512	0.565016	0.961	9208	tags=45%, list=47%, signal=84%
HALLMARK_ESTROGEN_RESPONSE_LATE	197	0.221502	0.866154	0.637363	0.605301	0.968	8707	tags=38%, list=44%, signal=67%
HALLMARK_APICAL_JUNCTION	194	0.239621	0.829617	0.661682	0.636864	0.976	8658	tags=43%, list=44%, signal=76%
HALLMARK_ESTROGEN_RESPONSE_EARLY	195	0.220467	0.823991	0.660036	0.628138	0.977	8705	tags=42%, list=44%, signal=74%
HALLMARK_TNFA_SIGNALING_VIA_NFKB	198	0.240227	0.676737	0.759674	0.806693	0.992	9073	tags=41%, list=46%, signal=75%
HALLMARK_BILE_ACID_METABOLISM	112	0.178111	0.674668	0.915517	0.791097	0.992	9039	tags=39%, list=46%, signal=72%
HALLMARK_APICAL_SURFACE	43	0.200085	0.653109	0.865562	0.80034	0.994	3848	tags=14%, list=19%, signal=17%
HALLMARK_MYOGENESIS	198	-0.409069	-1.33904	0.200795	0.643161	0.722	2792	tags=51%, list=14%, signal=59%
HALLMARK_KRAS_SIGNALING_DN	194	-0.171281	-0.782937	0.828042	1	0.97	3033	tags=30%, list=15%, signal=35%
HALLMARK_XENOBIOTIC_METABOLISM	196	-0.168718	-0.740672	0.882353	1	0.976	1114	tags=15%, list=6%, signal=16%
HALLMARK_COAGULATION	138	-0.133112	-0.504544	0.982571	1	0.989	16237	tags=99%, list=82%, signal=550%
HALLMARK_EPITHELIAL_MESENCHYMAL_TRANSITION	197	-0.134989	-0.430047	0.952083	0.973815	0.989	2035	tags=18%, list=10%, signal=20%
