# Supplementary material for: Pan-cancer analysis identifies LMNB1 as a target to redress Th1/Th2 imbalance and enhance PARP inhibitor response in human cancers
Source: Cancer Cell Int. 2022 Mar 3;22:101. doi: 10.1186/s12935-022-02467-4 (PMC8896121; doi:10.1186/s12935-022-02467-4)
Supplement: Supplementary file 4 — Additional file 4: Table S4. GESA with KEGG gene sets of PRAD cohort in TCGA. [file 12935_2022_2467_MOESM4_ESM.xlsx]

## Sheet: GESA_KEGG
Table S4: GESA with KEGG gene sets of PRAD corhort in TCGA
GS	SIZE	ES	NES	NOM p-val	FDR q-val	FWER p-val	RANK AT MAX	LEADING EDGE
KEGG_CELL_CYCLE	124	0.691217	2.18708	0	0.0284357	0.01	4040	tags=65%, list=20%, signal=82%
KEGG_DNA_REPLICATION	36	0.830597	2.13857	0	0.0211122	0.013	1408	tags=72%, list=7%, signal=78%
KEGG_BASE_EXCISION_REPAIR	33	0.747849	2.01357	0	0.0455184	0.048	1571	tags=52%, list=8%, signal=56%
KEGG_NUCLEOTIDE_EXCISION_REPAIR	44	0.67881	1.95697	0	0.0604475	0.083	4834	tags=70%, list=24%, signal=93%
KEGG_MISMATCH_REPAIR	23	0.764607	1.9168	0	0.072429	0.119	2590	tags=78%, list=13%, signal=90%
KEGG_OOCYTE_MEIOSIS	111	0.545992	1.84414	0	0.126269	0.229	2247	tags=33%, list=11%, signal=37%
KEGG_HOMOLOGOUS_RECOMBINATION	26	0.710497	1.83808	0.0120968	0.112324	0.238	4506	tags=81%, list=23%, signal=104%
KEGG_PYRIMIDINE_METABOLISM	98	0.551401	1.82615	0	0.106309	0.252	4141	tags=43%, list=21%, signal=54%
KEGG_UBIQUITIN_MEDIATED_PROTEOLYSIS	129	0.587798	1.80736	0	0.111605	0.289	4673	tags=58%, list=24%, signal=76%
KEGG_P53_SIGNALING_PATHWAY	66	0.542114	1.80552	0.011257	0.10197	0.292	4635	tags=45%, list=23%, signal=59%
KEGG_BASAL_TRANSCRIPTION_FACTORS	35	0.632673	1.80344	0.00193798	0.0944164	0.296	3764	tags=57%, list=19%, signal=70%
KEGG_SPLICEOSOME	124	0.628467	1.78294	0.00392157	0.101916	0.334	5768	tags=74%, list=29%, signal=104%
KEGG_PROGESTERONE_MEDIATED_OOCYTE_MATURATION	85	0.531436	1.76001	0.0037594	0.109849	0.378	5631	tags=52%, list=29%, signal=72%
KEGG_PURINE_METABOLISM	154	0.461946	1.73989	0	0.119373	0.419	4529	tags=36%, list=23%, signal=46%
KEGG_RNA_DEGRADATION	54	0.606214	1.73886	0.00203252	0.112062	0.419	5512	tags=69%, list=28%, signal=95%
KEGG_ONE_CARBON_POOL_BY_FOLATE	17	0.642186	1.70896	0.00992064	0.132714	0.477	2189	tags=47%, list=11%, signal=53%
KEGG_COLORECTAL_CANCER	62	0.55475	1.68852	0.00191205	0.147147	0.527	4865	tags=53%, list=25%, signal=70%
KEGG_FC_GAMMA_R_MEDIATED_PHAGOCYTOSIS	92	0.519541	1.64403	0.013308	0.196229	0.641	6189	tags=59%, list=31%, signal=85%
KEGG_AMINOACYL_TRNA_BIOSYNTHESIS	22	0.689258	1.6313	0.0208768	0.203946	0.671	3791	tags=68%, list=19%, signal=84%
KEGG_NON_SMALL_CELL_LUNG_CANCER	54	0.51308	1.62868	0.0112782	0.19817	0.676	4986	tags=48%, list=25%, signal=64%
KEGG_PATHOGENIC_ESCHERICHIA_COLI_INFECTION	55	0.505478	1.62581	0.0143885	0.193873	0.681	6189	tags=53%, list=31%, signal=77%
KEGG_CYSTEINE_AND_METHIONINE_METABOLISM	34	0.499053	1.6107	0.0277778	0.203358	0.717	7634	tags=56%, list=39%, signal=91%
KEGG_RENAL_CELL_CARCINOMA	66	0.52489	1.59342	0.0130354	0.219893	0.749	6291	tags=62%, list=32%, signal=91%
KEGG_MTOR_SIGNALING_PATHWAY	51	0.492905	1.59297	0.0223048	0.211501	0.75	7724	tags=65%, list=39%, signal=106%
KEGG_CHRONIC_MYELOID_LEUKEMIA	73	0.51435	1.57742	0.00772201	0.225172	0.784	5313	tags=53%, list=27%, signal=73%
KEGG_PANCREATIC_CANCER	69	0.504193	1.5754	0.00934579	0.219533	0.789	5044	tags=46%, list=26%, signal=62%
KEGG_NEUROTROPHIN_SIGNALING_PATHWAY	125	0.475818	1.57085	0.00743494	0.218159	0.793	7595	tags=63%, list=38%, signal=102%
KEGG_PROSTATE_CANCER	89	0.470859	1.55546	0.0187617	0.230485	0.812	4878	tags=44%, list=25%, signal=58%
KEGG_ENDOMETRIAL_CANCER	52	0.5071	1.54758	0.035514	0.234025	0.821	4865	tags=52%, list=25%, signal=69%
KEGG_T_CELL_RECEPTOR_SIGNALING_PATHWAY	107	0.490285	1.54068	0.0766283	0.236507	0.827	7524	tags=66%, list=38%, signal=107%
KEGG_ERBB_SIGNALING_PATHWAY	86	0.469883	1.53687	0.0170778	0.233649	0.832	5007	tags=43%, list=25%, signal=57%
KEGG_SMALL_CELL_LUNG_CANCER	84	0.480374	1.53229	0.0205607	0.232624	0.834	6675	tags=55%, list=34%, signal=82%
KEGG_FC_EPSILON_RI_SIGNALING_PATHWAY	79	0.441545	1.52621	0.04947	0.233366	0.842	7863	tags=56%, list=40%, signal=92%
KEGG_PENTOSE_PHOSPHATE_PATHWAY	27	0.513497	1.49418	0.0740741	0.273974	0.871	6604	tags=52%, list=33%, signal=78%
KEGG_GLIOMA	65	0.442076	1.48941	0.0431655	0.27334	0.877	5007	tags=40%, list=25%, signal=53%
KEGG_INSULIN_SIGNALING_PATHWAY	137	0.419479	1.48484	0.0468468	0.272949	0.88	6879	tags=50%, list=35%, signal=76%
KEGG_APOPTOSIS	87	0.455982	1.48091	0.0485075	0.272681	0.89	6991	tags=54%, list=35%, signal=83%
KEGG_CYTOSOLIC_DNA_SENSING_PATHWAY	53	0.443249	1.47183	0.0936396	0.280156	0.898	6333	tags=45%, list=32%, signal=66%
KEGG_RNA_POLYMERASE	29	0.522607	1.46853	0.0752896	0.278495	0.899	4445	tags=48%, list=23%, signal=62%
KEGG_SELENOAMINO_ACID_METABOLISM	24	0.498234	1.44275	0.0902111	0.311455	0.914	5277	tags=50%, list=27%, signal=68%
KEGG_BLADDER_CANCER	41	0.447327	1.44071	0.0767857	0.307233	0.915	4388	tags=34%, list=22%, signal=44%
KEGG_RIG_I_LIKE_RECEPTOR_SIGNALING_PATHWAY	69	0.420566	1.43367	0.0767888	0.310584	0.919	6333	tags=45%, list=32%, signal=66%
KEGG_CITRATE_CYCLE_TCA_CYCLE	30	0.566625	1.43128	0.129344	0.307107	0.92	6993	tags=70%, list=35%, signal=108%
KEGG_TOLL_LIKE_RECEPTOR_SIGNALING_PATHWAY	102	0.427639	1.4242	0.0981818	0.311959	0.923	7630	tags=53%, list=39%, signal=86%
KEGG_PATHWAYS_IN_CANCER	322	0.395749	1.40511	0.0880734	0.335063	0.932	5945	tags=38%, list=30%, signal=53%
KEGG_GLYCOLYSIS_GLUCONEOGENESIS	62	0.414484	1.39907	0.100352	0.337625	0.934	4814	tags=31%, list=24%, signal=40%
KEGG_INOSITOL_PHOSPHATE_METABOLISM	54	0.456337	1.38721	0.109023	0.349722	0.939	8042	tags=67%, list=41%, signal=112%
KEGG_ENDOCYTOSIS	179	0.402304	1.38533	0.0934579	0.346336	0.941	7359	tags=47%, list=37%, signal=75%
KEGG_ADHERENS_JUNCTION	68	0.468962	1.38439	0.128913	0.340813	0.942	6924	tags=59%, list=35%, signal=90%
KEGG_ACUTE_MYELOID_LEUKEMIA	57	0.44045	1.37118	0.110057	0.355346	0.945	7629	tags=56%, list=39%, signal=91%
KEGG_SNARE_INTERACTIONS_IN_VESICULAR_TRANSPORT	38	0.449957	1.3595	0.119485	0.366749	0.949	7483	tags=63%, list=38%, signal=101%
KEGG_B_CELL_RECEPTOR_SIGNALING_PATHWAY	75	0.444676	1.35496	0.147287	0.366897	0.952	7620	tags=63%, list=39%, signal=102%
KEGG_CHEMOKINE_SIGNALING_PATHWAY	184	0.403777	1.35112	0.166667	0.366309	0.953	6675	tags=47%, list=34%, signal=71%
KEGG_WNT_SIGNALING_PATHWAY	150	0.387813	1.34475	0.138596	0.369811	0.955	6750	tags=43%, list=34%, signal=65%
KEGG_THYROID_CANCER	29	0.448906	1.34451	0.13197	0.363474	0.955	7656	tags=66%, list=39%, signal=107%
KEGG_NATURAL_KILLER_CELL_MEDIATED_CYTOTOXICITY	131	0.399034	1.34252	0.171846	0.360058	0.956	9288	tags=62%, list=47%, signal=116%
KEGG_NOTCH_SIGNALING_PATHWAY	47	0.441789	1.33651	0.139623	0.36397	0.96	8216	tags=62%, list=42%, signal=105%
KEGG_ALANINE_ASPARTATE_AND_GLUTAMATE_METABOLISM	30	0.415518	1.32178	0.152015	0.381323	0.965	1015	tags=17%, list=5%, signal=18%
KEGG_TGF_BETA_SIGNALING_PATHWAY	85	0.414618	1.31813	0.174312	0.380688	0.966	7460	tags=49%, list=38%, signal=79%
KEGG_LYSINE_DEGRADATION	39	0.459497	1.31509	0.166038	0.379598	0.968	6305	tags=54%, list=32%, signal=79%
KEGG_GLYCOSYLPHOSPHATIDYLINOSITOL_GPI_ANCHOR_BIOSYNTHESIS	25	0.495004	1.3113	0.198039	0.379913	0.97	8263	tags=60%, list=42%, signal=103%
KEGG_GNRH_SIGNALING_PATHWAY	101	0.360033	1.29821	0.15625	0.394423	0.974	7865	tags=44%, list=40%, signal=72%
KEGG_REGULATION_OF_ACTIN_CYTOSKELETON	211	0.369343	1.2967	0.181159	0.390861	0.976	8061	tags=50%, list=41%, signal=84%
KEGG_AXON_GUIDANCE	128	0.380439	1.29566	0.172101	0.386435	0.976	5687	tags=34%, list=29%, signal=47%
KEGG_NOD_LIKE_RECEPTOR_SIGNALING_PATHWAY	61	0.417521	1.28436	0.216117	0.398743	0.978	8031	tags=52%, list=41%, signal=88%
KEGG_EPITHELIAL_CELL_SIGNALING_IN_HELICOBACTER_PYLORI_INFECTION	68	0.392233	1.28118	0.17446	0.398136	0.981	7863	tags=50%, list=40%, signal=83%
KEGG_DRUG_METABOLISM_OTHER_ENZYMES	51	0.359731	1.27949	0.161538	0.394837	0.981	675	tags=10%, list=3%, signal=10%
KEGG_PROTEASOME	43	0.52135	1.27086	0.251429	0.402214	0.985	2137	tags=35%, list=11%, signal=39%
KEGG_FRUCTOSE_AND_MANNOSE_METABOLISM	33	0.420863	1.26799	0.188645	0.400757	0.985	7374	tags=48%, list=37%, signal=77%
KEGG_PYRUVATE_METABOLISM	40	0.404873	1.26515	0.190741	0.39951	0.985	4645	tags=33%, list=24%, signal=42%
KEGG_MELANOMA	71	0.362951	1.2643	0.171076	0.395209	0.985	4865	tags=28%, list=25%, signal=37%
KEGG_PRIMARY_IMMUNODEFICIENCY	35	0.524144	1.25276	0.3	0.407678	0.987	6650	tags=69%, list=34%, signal=103%
KEGG_TERPENOID_BACKBONE_BIOSYNTHESIS	15	0.515767	1.24458	0.231518	0.414901	0.987	6964	tags=53%, list=35%, signal=82%
KEGG_ANTIGEN_PROCESSING_AND_PRESENTATION	80	0.396842	1.24251	0.230216	0.41309	0.987	9288	tags=55%, list=47%, signal=103%
KEGG_REGULATION_OF_AUTOPHAGY	34	0.37501	1.24109	0.219015	0.409615	0.987	8825	tags=53%, list=45%, signal=96%
KEGG_LEISHMANIA_INFECTION	69	0.433699	1.23176	0.28972	0.417814	0.989	7863	tags=58%, list=40%, signal=96%
KEGG_PHOSPHATIDYLINOSITOL_SIGNALING_SYSTEM	76	0.385431	1.2313	0.270909	0.413079	0.989	6675	tags=47%, list=34%, signal=71%
KEGG_LEUKOCYTE_TRANSENDOTHELIAL_MIGRATION	115	0.371789	1.23111	0.25365	0.407988	0.989	8169	tags=50%, list=41%, signal=85%
KEGG_VASOPRESSIN_REGULATED_WATER_REABSORPTION	44	0.413488	1.22857	0.247273	0.406103	0.99	7865	tags=61%, list=40%, signal=102%
KEGG_LONG_TERM_POTENTIATION	70	0.361599	1.22775	0.204991	0.402413	0.99	6497	tags=39%, list=33%, signal=57%
KEGG_DORSO_VENTRAL_AXIS_FORMATION	24	0.459536	1.22741	0.263158	0.397812	0.99	9736	tags=79%, list=49%, signal=156%
KEGG_AMINO_SUGAR_AND_NUCLEOTIDE_SUGAR_METABOLISM	43	0.402439	1.2022	0.279159	0.4299	0.992	5809	tags=37%, list=29%, signal=53%
KEGG_PANTOTHENATE_AND_COA_BIOSYNTHESIS	16	0.419412	1.20185	0.252708	0.425232	0.992	8740	tags=56%, list=44%, signal=101%
KEGG_HUNTINGTONS_DISEASE	166	0.348429	1.19734	0.283636	0.426779	0.992	3941	tags=27%, list=20%, signal=34%
KEGG_O_GLYCAN_BIOSYNTHESIS	29	0.399164	1.18882	0.304833	0.434014	0.993	9245	tags=52%, list=47%, signal=97%
KEGG_N_GLYCAN_BIOSYNTHESIS	46	0.446143	1.17279	0.316327	0.450611	0.993	6361	tags=50%, list=32%, signal=74%
KEGG_SPHINGOLIPID_METABOLISM	36	0.373195	1.17255	0.273723	0.445877	0.993	6954	tags=44%, list=35%, signal=68%
KEGG_GAP_JUNCTION	87	0.344256	1.16689	0.287695	0.448807	0.993	7269	tags=39%, list=37%, signal=62%
KEGG_GLYOXYLATE_AND_DICARBOXYLATE_METABOLISM	16	0.471766	1.1662	0.3125	0.44478	0.993	7731	tags=56%, list=39%, signal=92%
KEGG_MAPK_SIGNALING_PATHWAY	266	0.312448	1.16182	0.290493	0.445563	0.993	6406	tags=33%, list=32%, signal=48%
KEGG_ABC_TRANSPORTERS	44	0.348732	1.15597	0.290657	0.448604	0.993	6191	tags=32%, list=31%, signal=46%
KEGG_TIGHT_JUNCTION	129	0.317192	1.13783	0.307965	0.469355	0.993	8217	tags=44%, list=42%, signal=75%
KEGG_GLYCEROLIPID_METABOLISM	42	0.325411	1.13255	0.300166	0.471399	0.994	6335	tags=33%, list=32%, signal=49%
KEGG_AMYOTROPHIC_LATERAL_SCLEROSIS_ALS	53	0.330385	1.13209	0.306878	0.467175	0.994	3240	tags=21%, list=16%, signal=25%
KEGG_JAK_STAT_SIGNALING_PATHWAY	155	0.332352	1.12874	0.332083	0.466984	0.994	9636	tags=53%, list=49%, signal=102%
KEGG_VIRAL_MYOCARDITIS	68	0.374073	1.12555	0.357274	0.466447	0.994	7666	tags=47%, list=39%, signal=77%
KEGG_LONG_TERM_DEPRESSION	68	0.313132	1.1236	0.313433	0.463925	0.994	4960	tags=25%, list=25%, signal=33%
KEGG_HEDGEHOG_SIGNALING_PATHWAY	56	0.345498	1.11099	0.345745	0.47634	0.994	8451	tags=48%, list=43%, signal=84%
KEGG_GLYCOSAMINOGLYCAN_BIOSYNTHESIS_KERATAN_SULFATE	15	0.419261	1.10046	0.357013	0.486479	0.994	6273	tags=40%, list=32%, signal=59%
KEGG_ADIPOCYTOKINE_SIGNALING_PATHWAY	67	0.315542	1.09504	0.35567	0.489828	0.994	8175	tags=46%, list=41%, signal=79%
KEGG_VEGF_SIGNALING_PATHWAY	76	0.302007	1.0919	0.360206	0.489247	0.995	9311	tags=50%, list=47%, signal=94%
KEGG_MELANOGENESIS	101	0.303928	1.08009	0.378559	0.500513	0.996	8451	tags=44%, list=43%, signal=76%
KEGG_PRION_DISEASES	35	0.343218	1.07808	0.351916	0.498268	0.996	6161	tags=31%, list=31%, signal=46%
KEGG_TYPE_II_DIABETES_MELLITUS	47	0.3161	1.06334	0.391228	0.514511	0.996	4865	tags=28%, list=25%, signal=37%
KEGG_VIBRIO_CHOLERAE_INFECTION	52	0.330741	1.03984	0.442857	0.54192	0.997	9241	tags=50%, list=47%, signal=94%
KEGG_PORPHYRIN_AND_CHLOROPHYLL_METABOLISM	40	0.333426	1.03084	0.404326	0.549556	0.997	8283	tags=45%, list=42%, signal=77%
KEGG_ALZHEIMERS_DISEASE	151	0.280843	1.00409	0.438163	0.582073	0.997	7676	tags=37%, list=39%, signal=60%
KEGG_TYPE_I_DIABETES_MELLITUS	41	0.384522	0.992616	0.474286	0.593285	0.997	9047	tags=61%, list=46%, signal=112%
KEGG_INTESTINAL_IMMUNE_NETWORK_FOR_IGA_PRODUCTION	46	0.383056	0.991127	0.482309	0.590024	0.997	10774	tags=76%, list=55%, signal=167%
KEGG_GLUTATHIONE_METABOLISM	48	0.316012	0.990619	0.463899	0.585538	0.997	2467	tags=17%, list=12%, signal=19%
KEGG_GRAFT_VERSUS_HOST_DISEASE	37	0.411224	0.983305	0.494297	0.590183	0.997	9047	tags=57%, list=46%, signal=105%
KEGG_BIOSYNTHESIS_OF_UNSATURATED_FATTY_ACIDS	20	0.364205	0.977906	0.476636	0.592158	0.997	5894	tags=35%, list=30%, signal=50%
KEGG_PROTEIN_EXPORT	22	0.413802	0.974794	0.518293	0.591657	0.997	10146	tags=77%, list=51%, signal=159%
KEGG_SYSTEMIC_LUPUS_ERYTHEMATOSUS	54	0.352135	0.973201	0.479478	0.589071	0.997	9239	tags=57%, list=47%, signal=108%
KEGG_MATURITY_ONSET_DIABETES_OF_THE_YOUNG	25	0.319857	0.970214	0.465574	0.588254	0.997	9208	tags=52%, list=47%, signal=97%
KEGG_STEROID_BIOSYNTHESIS	17	0.388633	0.964416	0.502825	0.591465	0.997	10104	tags=65%, list=51%, signal=132%
KEGG_STARCH_AND_SUCROSE_METABOLISM	51	0.284444	0.9623	0.507389	0.589237	0.997	8743	tags=39%, list=44%, signal=70%
KEGG_FOCAL_ADHESION	197	0.293668	0.96122	0.510909	0.585759	0.997	7618	tags=40%, list=39%, signal=65%
KEGG_GLYCOSAMINOGLYCAN_BIOSYNTHESIS_HEPARAN_SULFATE	26	0.306651	0.951499	0.53367	0.595388	0.999	9053	tags=50%, list=46%, signal=92%
KEGG_BASAL_CELL_CARCINOMA	55	0.305949	0.950114	0.510714	0.592212	0.999	8387	tags=44%, list=42%, signal=76%
KEGG_GALACTOSE_METABOLISM	26	0.321306	0.94131	0.52468	0.599626	0.999	7667	tags=38%, list=39%, signal=63%
KEGG_BUTANOATE_METABOLISM	34	0.315816	0.940034	0.538182	0.596579	0.999	8815	tags=50%, list=45%, signal=90%
KEGG_CYTOKINE_CYTOKINE_RECEPTOR_INTERACTION	261	0.275489	0.920252	0.519856	0.619207	0.999	9691	tags=47%, list=49%, signal=91%
KEGG_ALLOGRAFT_REJECTION	35	0.403197	0.907619	0.572277	0.631457	0.999	9054	tags=63%, list=46%, signal=116%
KEGG_CELL_ADHESION_MOLECULES_CAMS	128	0.287916	0.886884	0.560579	0.654923	0.999	8432	tags=45%, list=43%, signal=77%
KEGG_GLYCEROPHOSPHOLIPID_METABOLISM	72	0.237937	0.874224	0.644182	0.666793	0.999	4626	tags=21%, list=23%, signal=27%
KEGG_AUTOIMMUNE_THYROID_DISEASE	50	0.309656	0.857535	0.584071	0.683918	0.999	10074	tags=52%, list=51%, signal=106%
KEGG_ASTHMA	28	0.341655	0.848111	0.6	0.692097	0.999	10814	tags=64%, list=55%, signal=142%
KEGG_HEMATOPOIETIC_CELL_LINEAGE	85	0.288889	0.832815	0.606403	0.707708	0.999	9602	tags=51%, list=49%, signal=98%
KEGG_VALINE_LEUCINE_AND_ISOLEUCINE_DEGRADATION	43	0.301318	0.802648	0.665385	0.745125	1	6734	tags=37%, list=34%, signal=56%
KEGG_PROXIMAL_TUBULE_BICARBONATE_RECLAMATION	23	0.258189	0.796261	0.750439	0.748879	1	8430	tags=39%, list=43%, signal=68%
KEGG_PENTOSE_AND_GLUCURONATE_INTERCONVERSIONS	28	0.27055	0.792205	0.674917	0.748659	1	1692	tags=11%, list=9%, signal=12%
KEGG_PARKINSONS_DISEASE	112	0.260283	0.790853	0.662432	0.744909	1	3975	tags=21%, list=20%, signal=26%
KEGG_GLYCOSAMINOGLYCAN_BIOSYNTHESIS_CHONDROITIN_SULFATE	22	0.272696	0.760724	0.74388	0.78102	1	7520	tags=36%, list=38%, signal=59%
KEGG_TASTE_TRANSDUCTION	51	0.238953	0.760362	0.676136	0.775595	1	5765	tags=22%, list=29%, signal=30%
KEGG_ECM_RECEPTOR_INTERACTION	84	0.245013	0.728798	0.695733	0.812071	1	9938	tags=51%, list=50%, signal=103%
KEGG_GLYCINE_SERINE_AND_THREONINE_METABOLISM	31	0.225208	0.699477	0.841549	0.846024	1	1681	tags=13%, list=9%, signal=14%
KEGG_NICOTINATE_AND_NICOTINAMIDE_METABOLISM	24	0.225255	0.692284	0.872531	0.849902	1	8740	tags=50%, list=44%, signal=90%
KEGG_PEROXISOME	78	0.213564	0.689515	0.819495	0.847696	1	9889	tags=50%, list=50%, signal=100%
KEGG_LYSOSOME	121	0.222154	0.684136	0.809434	0.848658	1	7939	tags=40%, list=40%, signal=66%
KEGG_ALDOSTERONE_REGULATED_SODIUM_REABSORPTION	42	0.206663	0.680779	0.846024	0.846961	1	9736	tags=43%, list=49%, signal=84%
KEGG_VASCULAR_SMOOTH_MUSCLE_CONTRACTION	112	0.197056	0.67455	0.831325	0.848982	1	7865	tags=36%, list=40%, signal=59%
KEGG_PROPANOATE_METABOLISM	31	0.243446	0.646656	0.848126	0.87724	1	5894	tags=26%, list=30%, signal=37%
KEGG_NITROGEN_METABOLISM	23	0.204717	0.627463	0.906195	0.893047	1	1015	tags=9%, list=5%, signal=9%
KEGG_ASCORBATE_AND_ALDARATE_METABOLISM	25	0.207889	0.58577	0.898858	0.930749	1	11676	tags=64%, list=59%, signal=156%
KEGG_TRYPTOPHAN_METABOLISM	39	0.175374	0.583531	0.966443	0.926577	1	6738	tags=26%, list=34%, signal=39%
KEGG_ETHER_LIPID_METABOLISM	30	0.17148	0.552124	0.961131	0.947573	1	10296	tags=43%, list=52%, signal=90%
KEGG_FATTY_ACID_METABOLISM	42	0.171127	0.532634	0.953789	0.955986	1	9323	tags=40%, list=47%, signal=76%
KEGG_ARRHYTHMOGENIC_RIGHT_VENTRICULAR_CARDIOMYOPATHY_ARVC	74	0.176441	0.531333	0.937276	0.950411	1	7125	tags=28%, list=36%, signal=44%
KEGG_RIBOSOME	87	0.24397	0.461004	0.853191	0.981411	1	10927	tags=51%, list=55%, signal=113%
KEGG_CALCIUM_SIGNALING_PATHWAY	177	0.118383	0.425118	0.996581	0.98609	1	10326	tags=40%, list=52%, signal=82%
KEGG_ARACHIDONIC_ACID_METABOLISM	58	-0.334408	-1.27648	0.159574	1	0.973	4314	tags=48%, list=22%, signal=62%
KEGG_DRUG_METABOLISM_CYTOCHROME_P450	70	-0.322677	-1.17499	0.257143	1	0.993	3898	tags=39%, list=20%, signal=48%
KEGG_CARDIAC_MUSCLE_CONTRACTION	77	-0.321889	-1.13099	0.306604	1	0.994	2873	tags=43%, list=15%, signal=50%
KEGG_METABOLISM_OF_XENOBIOTICS_BY_CYTOCHROME_P450	68	-0.31085	-1.12307	0.286136	1	0.995	3898	tags=37%, list=20%, signal=46%
KEGG_LINOLEIC_ACID_METABOLISM	29	-0.290865	-0.973941	0.488778	1	0.997	4314	tags=48%, list=22%, signal=62%
KEGG_OLFACTORY_TRANSDUCTION	384	-0.26223	-0.97142	0.485043	1	0.997	11968	tags=97%, list=61%, signal=242%
KEGG_PRIMARY_BILE_ACID_BIOSYNTHESIS	16	-0.297549	-0.903618	0.589744	1	0.999	1977	tags=25%, list=10%, signal=28%
KEGG_PHENYLALANINE_METABOLISM	17	-0.288639	-0.874863	0.624402	1	0.999	2142	tags=29%, list=11%, signal=33%
KEGG_GLYCOSAMINOGLYCAN_DEGRADATION	21	-0.286474	-0.832802	0.657328	1	1	14102	tags=100%, list=71%, signal=349%
KEGG_ALPHA_LINOLENIC_ACID_METABOLISM	19	-0.249651	-0.792437	0.770601	1	1	378	tags=11%, list=2%, signal=11%
KEGG_DILATED_CARDIOMYOPATHY	90	-0.23145	-0.78168	0.704846	1	1	2802	tags=36%, list=14%, signal=41%
KEGG_RETINOL_METABOLISM	64	-0.206549	-0.770083	0.775076	1	1	14299	tags=98%, list=72%, signal=355%
KEGG_HYPERTROPHIC_CARDIOMYOPATHY_HCM	83	-0.227795	-0.765918	0.732456	1	1	2802	tags=35%, list=14%, signal=41%
KEGG_STEROID_HORMONE_BIOSYNTHESIS	55	-0.196967	-0.744173	0.811728	1	1	14599	tags=98%, list=74%, signal=375%
KEGG_BETA_ALANINE_METABOLISM	22	-0.249373	-0.738232	0.822072	1	1	2766	tags=32%, list=14%, signal=37%
KEGG_NEUROACTIVE_LIGAND_RECEPTOR_INTERACTION	271	-0.163977	-0.727931	0.856338	1	1	14150	tags=96%, list=72%, signal=334%
KEGG_HISTIDINE_METABOLISM	28	-0.215279	-0.714206	0.865741	1	1	1295	tags=21%, list=7%, signal=23%
KEGG_OTHER_GLYCAN_DEGRADATION	16	-0.260411	-0.670245	0.833333	1	1	14615	tags=100%, list=74%, signal=384%
KEGG_TYROSINE_METABOLISM	40	-0.173492	-0.633902	0.951899	1	1	985	tags=15%, list=5%, signal=16%
KEGG_OXIDATIVE_PHOSPHORYLATION	114	-0.197407	-0.598874	0.852679	1	1	1797	tags=25%, list=9%, signal=27%
KEGG_RENIN_ANGIOTENSIN_SYSTEM	17	-0.188857	-0.590828	0.941315	1	1	1834	tags=24%, list=9%, signal=26%
KEGG_COMPLEMENT_AND_COAGULATION_CASCADES	69	-0.178207	-0.575645	0.896789	1	1	16247	tags=100%, list=82%, signal=561%
KEGG_PPAR_SIGNALING_PATHWAY	69	-0.128526	-0.521933	0.994595	1	1	1203	tags=12%, list=6%, signal=12%
KEGG_GLYCOSPHINGOLIPID_BIOSYNTHESIS_LACTO_AND_NEOLACTO_SERIES	26	-0.151994	-0.513472	0.989822	1	1	1348	tags=15%, list=7%, signal=16%
KEGG_ARGININE_AND_PROLINE_METABOLISM	53	-0.133707	-0.496717	1	1	1	1676	tags=19%, list=8%, signal=21%
KEGG_GLYCOSPHINGOLIPID_BIOSYNTHESIS_GANGLIO_SERIES	15	-0.177026	-0.477336	0.987207	0.973841	1	2169	tags=20%, list=11%, signal=22%
