# Supplementary material for: Pan-cancer analysis identifies LMNB1 as a target to redress Th1/Th2 imbalance and enhance PARP inhibitor response in human cancers
Source: Cancer Cell Int. 2022 Mar 3;22:101. doi: 10.1186/s12935-022-02467-4 (PMC8896121; doi:10.1186/s12935-022-02467-4)
Supplement: Supplementary file 5 — Additional file 5: Table S5. GESA with GO_BP gene sets of PRAD cohort in TCGA. [file 12935_2022_2467_MOESM5_ESM.xlsx]

## Sheet: GSEA_GO_BP
Table S5: GESA with GO_BP gene sets of PRAD corhort in TCGA
GS	SIZE	ES	NES	NOM p-val	FDR q-val	FWER p-val	RANK AT MAX	LEADING EDGE
GOBP_MEIOTIC_CELL_CYCLE	228	0.627989	2.29965	0	0.186798	0.007	2586	tags=39%, list=13%, signal=44%
GOBP_REGULATION_OF_NUCLEAR_DIVISION	134	0.641783	2.22083	0	0.190206	0.028	1592	tags=35%, list=8%, signal=38%
GOBP_MEIOTIC_CELL_CYCLE_PROCESS	170	0.628048	2.21617	0	0.133053	0.029	2586	tags=37%, list=13%, signal=42%
GOBP_NEGATIVE_REGULATION_OF_NUCLEAR_DIVISION	54	0.749267	2.21535	0	0.1002	0.029	1147	tags=50%, list=6%, signal=53%
GOBP_REGULATION_OF_MITOTIC_NUCLEAR_DIVISION	109	0.675404	2.19235	0	0.0982021	0.039	1592	tags=41%, list=8%, signal=45%
GOBP_DNA_PACKAGING	159	0.639345	2.16386	0	0.0995362	0.05	2649	tags=46%, list=13%, signal=53%
GOBP_HISTONE_EXCHANGE	40	0.76002	2.15405	0	0.0947661	0.062	2069	tags=60%, list=10%, signal=67%
GOBP_DNA_CONFORMATION_CHANGE	266	0.645203	2.14092	0	0.0935725	0.076	4201	tags=59%, list=21%, signal=74%
GOBP_CHROMOSOME_SEGREGATION	301	0.657326	2.13353	0	0.0903829	0.087	3761	tags=56%, list=19%, signal=68%
GOBP_DOUBLE_STRAND_BREAK_REPAIR	228	0.657084	2.13291	0	0.0818742	0.088	4098	tags=61%, list=21%, signal=77%
GOBP_DNA_REPLICATION_INITIATION	40	0.817191	2.13039	0	0.0758508	0.09	2482	tags=78%, list=13%, signal=88%
GOBP_NUCLEAR_CHROMOSOME_SEGREGATION	241	0.651832	2.13023	0	0.069635	0.091	3761	tags=55%, list=19%, signal=67%
GOBP_NUCLEOSOME_ASSEMBLY	70	0.696672	2.12951	0	0.0645599	0.093	2543	tags=54%, list=13%, signal=62%
GOBP_DNA_REPLICATION	270	0.668575	2.1253	0	0.0620462	0.096	4267	tags=65%, list=22%, signal=82%
GOBP_REGULATION_OF_DNA_REPLICATION	103	0.662684	2.12435	0	0.058574	0.098	4369	tags=63%, list=22%, signal=81%
GOBP_ORGANELLE_FISSION	448	0.588088	2.124	0	0.055047	0.099	3967	tags=45%, list=20%, signal=55%
GOBP_CHROMOSOME_CONDENSATION	31	0.741253	2.12042	0	0.0530632	0.101	983	tags=42%, list=5%, signal=44%
GOBP_NUCLEOSOME_ORGANIZATION	107	0.649304	2.11487	0	0.0514244	0.103	3755	tags=56%, list=19%, signal=69%
GOBP_PROTEIN_LOCALIZATION_TO_CHROMOSOME	79	0.729791	2.11451	0	0.048881	0.103	3761	tags=73%, list=19%, signal=90%
GOBP_REGULATION_OF_MITOTIC_SISTER_CHROMATID_SEGREGATION	44	0.767555	2.11416	0	0.0466228	0.103	1147	tags=57%, list=6%, signal=60%
GOBP_DNA_RECOMBINATION	262	0.62247	2.10989	0	0.0460997	0.107	4118	tags=55%, list=21%, signal=69%
GOBP_REGULATION_OF_CHROMOSOME_SEPARATION	69	0.723536	2.10393	0	0.0469519	0.116	1857	tags=57%, list=9%, signal=62%
GOBP_BASE_EXCISION_REPAIR	39	0.748022	2.10253	0	0.0453616	0.117	3704	tags=69%, list=19%, signal=85%
GOBP_NEGATIVE_REGULATION_OF_METAPHASE_ANAPHASE_TRANSITION_OF_CELL_CYCLE	41	0.76448	2.10149	0	0.0440139	0.119	1147	tags=56%, list=6%, signal=59%
GOBP_PROTEIN_DNA_COMPLEX_SUBUNIT_ORGANIZATION	203	0.634237	2.10014	0	0.0426806	0.12	4797	tags=61%, list=24%, signal=80%
GOBP_REGULATION_OF_CHROMOSOME_SEGREGATION	83	0.724275	2.09537	0	0.0432131	0.124	1953	tags=58%, list=10%, signal=64%
GOBP_POSITIVE_REGULATION_OF_CYTOKINESIS	39	0.681627	2.0946	0	0.0418187	0.124	1857	tags=38%, list=9%, signal=42%
GOBP_RECOMBINATIONAL_REPAIR	129	0.681806	2.09359	0	0.0408211	0.126	3961	tags=65%, list=20%, signal=81%
GOBP_NEGATIVE_REGULATION_OF_CELL_CYCLE_PROCESS	323	0.585277	2.09333	0	0.0394135	0.126	4407	tags=49%, list=22%, signal=62%
GOBP_SIGNAL_TRANSDUCTION_INVOLVED_IN_CELL_CYCLE_CHECKPOINT	72	0.669925	2.09305	0	0.0383995	0.128	4143	tags=61%, list=21%, signal=77%
GOBP_MITOTIC_NUCLEAR_DIVISION	280	0.628189	2.09217	0	0.0374694	0.129	1966	tags=41%, list=10%, signal=45%
GOBP_DNA_DEPENDENT_DNA_REPLICATION	151	0.707978	2.08582	0	0.0383711	0.138	3838	tags=71%, list=19%, signal=87%
GOBP_TELOMERE_ORGANIZATION	141	0.671138	2.08569	0	0.037239	0.138	4388	tags=68%, list=22%, signal=87%
GOBP_MITOTIC_CELL_CYCLE_CHECKPOINT	153	0.649466	2.08368	0	0.036908	0.143	4711	tags=62%, list=24%, signal=81%
GOBP_MEIOSIS_I_CELL_CYCLE_PROCESS	110	0.614355	2.08313	0.00182149	0.0359899	0.145	2586	tags=36%, list=13%, signal=42%
GOBP_METAPHASE_ANAPHASE_TRANSITION_OF_CELL_CYCLE	63	0.735958	2.07989	0	0.0362809	0.149	1857	tags=59%, list=9%, signal=65%
GOBP_CHROMOSOME_SEPARATION	90	0.690284	2.07834	0	0.0356722	0.151	1912	tags=51%, list=10%, signal=56%
GOBP_HOMOLOGOUS_RECOMBINATION	55	0.662041	2.07777	0	0.0348953	0.152	3862	tags=51%, list=20%, signal=63%
GOBP_OOCYTE_MATURATION	21	0.722817	2.0769	0	0.0341588	0.153	855	tags=33%, list=4%, signal=35%
GOBP_CELL_CYCLE_G1_S_PHASE_TRANSITION	262	0.596722	2.07657	0	0.0334565	0.153	4407	tags=52%, list=22%, signal=66%
GOBP_NEGATIVE_REGULATION_OF_CELL_CYCLE_PHASE_TRANSITION	237	0.597043	2.07059	0	0.0347337	0.158	4407	tags=50%, list=22%, signal=63%
GOBP_NEGATIVE_REGULATION_OF_CHROMOSOME_ORGANIZATION	84	0.684052	2.07026	0	0.0339558	0.159	4343	tags=68%, list=22%, signal=87%
GOBP_ATP_DEPENDENT_CHROMATIN_REMODELING	71	0.684463	2.07025	0	0.0331661	0.159	3951	tags=65%, list=20%, signal=81%
GOBP_SISTER_CHROMATID_SEGREGATION	180	0.677506	2.0627	0	0.0345579	0.166	1953	tags=49%, list=10%, signal=54%
GOBP_CELL_CYCLE_CHECKPOINT	199	0.651462	2.06216	0	0.033925	0.167	4735	tags=65%, list=24%, signal=84%
GOBP_INTERSTRAND_CROSS_LINK_REPAIR	51	0.723145	2.06053	0	0.0336439	0.168	3087	tags=67%, list=16%, signal=79%
GOBP_MITOTIC_SISTER_CHROMATID_SEGREGATION	154	0.681514	2.05955	0.00193798	0.0333018	0.169	1953	tags=50%, list=10%, signal=55%
GOBP_CENTROMERE_COMPLEX_ASSEMBLY	37	0.80699	2.05752	0	0.0335654	0.175	2377	tags=76%, list=12%, signal=86%
GOBP_SPINDLE_ORGANIZATION	171	0.649528	2.05707	0	0.0330374	0.176	3755	tags=57%, list=19%, signal=70%
GOBP_CHROMATIN_REMODELING_AT_CENTROMERE	28	0.838173	2.05696	0	0.0323767	0.176	1500	tags=75%, list=8%, signal=81%
GOBP_POSITIVE_REGULATION_OF_CELL_CYCLE	367	0.555217	2.05243	0	0.0331516	0.185	4407	tags=44%, list=22%, signal=55%
GOBP_REGULATION_OF_CELL_CYCLE_PHASE_TRANSITION	431	0.582929	2.0522	0	0.0325578	0.187	4407	tags=50%, list=22%, signal=63%
GOBP_MITOTIC_G1_S_TRANSITION_CHECKPOINT	62	0.645361	2.04723	0	0.0333584	0.196	4407	tags=58%, list=22%, signal=75%
GOBP_DNA_REPLICATION_INDEPENDENT_NUCLEOSOME_ORGANIZATION	35	0.797222	2.04557	0	0.0332966	0.2	2286	tags=77%, list=12%, signal=87%
GOBP_PROTEIN_LOCALIZATION_TO_KINETOCHORE	17	0.851883	2.04424	0.00190476	0.0331942	0.205	955	tags=71%, list=5%, signal=74%
GOBP_POSITIVE_REGULATION_OF_CELL_CYCLE_PROCESS	280	0.571083	2.04348	0	0.0327557	0.205	4407	tags=46%, list=22%, signal=58%
GOBP_POSITIVE_REGULATION_OF_DNA_METABOLIC_PROCESS	183	0.58416	2.04212	0	0.0327481	0.209	4744	tags=56%, list=24%, signal=73%
GOBP_DNA_GEOMETRIC_CHANGE	109	0.68851	2.03925	0	0.0330053	0.213	4279	tags=71%, list=22%, signal=90%
GOBP_REGULATION_OF_MEIOTIC_CELL_CYCLE	45	0.602581	2.03867	0.00174825	0.0327538	0.214	855	tags=24%, list=4%, signal=25%
GOBP_MEIOTIC_CHROMOSOME_SEGREGATION	74	0.630525	2.0385	0	0.0322303	0.214	2133	tags=36%, list=11%, signal=41%
GOBP_G2_DNA_DAMAGE_CHECKPOINT	29	0.7416	2.03711	0	0.0322301	0.217	1673	tags=48%, list=8%, signal=53%
GOBP_RESPONSE_TO_IONIZING_RADIATION	134	0.614234	2.03232	0	0.033538	0.227	3941	tags=54%, list=20%, signal=67%
GOBP_REGULATION_OF_DNA_METABOLIC_PROCESS	314	0.582756	2.03163	0	0.0333447	0.228	4388	tags=54%, list=22%, signal=68%
GOBP_DNA_INTEGRITY_CHECKPOINT	146	0.646848	2.02959	0	0.0335717	0.233	4735	tags=65%, list=24%, signal=85%
GOBP_POSITIVE_REGULATION_OF_DNA_REPLICATION	36	0.654747	2.02897	0	0.0332246	0.234	4369	tags=58%, list=22%, signal=75%
GOBP_DNA_DEPENDENT_DNA_REPLICATION_MAINTENANCE_OF_FIDELITY	45	0.728919	2.02816	0	0.0328796	0.235	4216	tags=78%, list=21%, signal=99%
GOBP_CHROMOSOME_LOCALIZATION	75	0.650483	2.0265	0.00185185	0.0327707	0.237	2321	tags=45%, list=12%, signal=51%
GOBP_CELLULAR_RESPONSE_TO_UV	85	0.589233	2.02562	0	0.032623	0.238	4712	tags=54%, list=24%, signal=71%
GOBP_SIGNAL_TRANSDUCTION_BY_P53_CLASS_MEDIATOR	255	0.575848	2.02419	0	0.0324598	0.24	4407	tags=52%, list=22%, signal=66%
GOBP_DNA_BIOSYNTHETIC_PROCESS	178	0.594904	2.02324	0	0.0323244	0.24	5377	tags=61%, list=27%, signal=83%
GOBP_NEGATIVE_REGULATION_OF_MITOTIC_CELL_CYCLE	292	0.568729	2.02174	0	0.0322764	0.243	4541	tags=48%, list=23%, signal=61%
GOBP_MITOTIC_DNA_INTEGRITY_CHECKPOINT	100	0.633409	2.01966	0	0.0325381	0.247	4619	tags=59%, list=23%, signal=77%
GOBP_RNA_LOCALIZATION	227	0.632911	2.01203	0	0.0348609	0.265	2934	tags=54%, list=15%, signal=63%
GOBP_CELL_CYCLE_G2_M_PHASE_TRANSITION	264	0.594051	2.01084	0	0.0347851	0.268	4396	tags=52%, list=22%, signal=66%
GOBP_SPERMATID_NUCLEUS_DIFFERENTIATION	16	0.730122	2.01063	0	0.0343827	0.269	3382	tags=44%, list=17%, signal=53%
GOBP_CELLULAR_RESPONSE_TO_RADIATION	183	0.535554	2.00955	0	0.0342918	0.272	5469	tags=49%, list=28%, signal=67%
GOBP_REGULATION_OF_CELL_CYCLE_G2_M_PHASE_TRANSITION	208	0.605989	2.00668	0	0.0352027	0.283	3343	tags=48%, list=17%, signal=57%
GOBP_MITOTIC_SPINDLE_ORGANIZATION	110	0.668146	2.00653	0.00197628	0.0348443	0.284	3010	tags=56%, list=15%, signal=66%
GOBP_REGULATION_OF_SIGNAL_TRANSDUCTION_BY_P53_CLASS_MEDIATOR	170	0.592341	2.0048	0	0.0352361	0.292	3941	tags=54%, list=20%, signal=67%
GOBP_REGULATION_OF_CYTOKINESIS	88	0.612227	2.00169	0	0.0358437	0.299	2066	tags=38%, list=10%, signal=42%
GOBP_CHROMATIN_ASSEMBLY_OR_DISASSEMBLY	142	0.612784	2.00113	0	0.0356609	0.302	4051	tags=54%, list=21%, signal=68%
GOBP_REPLICATION_FORK_PROCESSING	36	0.725739	1.9996	0	0.0357257	0.306	4216	tags=75%, list=21%, signal=95%
GOBP_RNA_EXPORT_FROM_NUCLEUS	138	0.666478	1.99902	0	0.0353777	0.306	5197	tags=75%, list=26%, signal=102%
GOBP_REGULATION_OF_CYCLIN_DEPENDENT_PROTEIN_KINASE_ACTIVITY	98	0.585472	1.99814	0	0.0352726	0.308	4367	tags=50%, list=22%, signal=64%
GOBP_RNA_3_END_PROCESSING	144	0.610552	1.99699	0	0.0352731	0.31	5037	tags=59%, list=25%, signal=79%
GOBP_POSITIVE_REGULATION_OF_CELL_CYCLE_G2_M_PHASE_TRANSITION	30	0.703879	1.99677	0	0.0349489	0.31	1208	tags=43%, list=6%, signal=46%
GOBP_MICROTUBULE_CYTOSKELETON_ORGANIZATION_INVOLVED_IN_MITOSIS	135	0.65208	1.99637	0	0.0345889	0.311	3108	tags=54%, list=16%, signal=64%
GOBP_METAPHASE_PLATE_CONGRESSION	62	0.673871	1.99619	0.0095057	0.0342312	0.312	2321	tags=50%, list=12%, signal=56%
GOBP_SISTER_CHROMATID_COHESION	46	0.708695	1.99365	0	0.0346073	0.32	4382	tags=70%, list=22%, signal=89%
GOBP_RESPONSE_TO_GAMMA_RADIATION	50	0.620974	1.98553	0	0.0375507	0.342	5469	tags=62%, list=28%, signal=86%
GOBP_POSITIVE_REGULATION_OF_CELL_CYCLE_PHASE_TRANSITION	95	0.587204	1.98137	0.0018315	0.0386172	0.352	4696	tags=52%, list=24%, signal=67%
GOBP_SPINDLE_ASSEMBLY	106	0.637511	1.97825	0.00195695	0.0391901	0.365	2989	tags=53%, list=15%, signal=62%
GOBP_ESTABLISHMENT_OF_RNA_LOCALIZATION	194	0.622626	1.97654	0	0.0396414	0.368	5534	tags=68%, list=28%, signal=94%
GOBP_RESPONSE_TO_UV	141	0.567699	1.97398	0	0.0402489	0.374	4712	tags=52%, list=24%, signal=68%
GOBP_REGULATION_OF_GENE_EXPRESSION_EPIGENETIC	131	0.609103	1.97162	0	0.0406318	0.383	5398	tags=67%, list=27%, signal=92%
GOBP_REGULATION_OF_MRNA_METABOLIC_PROCESS	324	0.577462	1.97146	0	0.0403037	0.383	5570	tags=59%, list=28%, signal=81%
GOBP_POSITIVE_REGULATION_OF_MRNA_PROCESSING	33	0.655054	1.97009	0	0.0404308	0.386	3411	tags=55%, list=17%, signal=66%
GOBP_MITOTIC_DNA_REPLICATION	15	0.903526	1.96961	0	0.0402232	0.387	475	tags=80%, list=2%, signal=82%
GOBP_MITOTIC_SPINDLE_ASSEMBLY	60	0.669311	1.96919	0.00193798	0.0398478	0.387	2989	tags=58%, list=15%, signal=69%
GOBP_POSITIVE_REGULATION_OF_MITOTIC_CELL_CYCLE	106	0.595243	1.96856	0	0.0398532	0.39	4696	tags=53%, list=24%, signal=69%
GOBP_REGULATION_OF_DNA_REPAIR	112	0.602519	1.96799	0	0.0396943	0.39	4076	tags=54%, list=21%, signal=68%
GOBP_NEGATIVE_REGULATION_OF_MRNA_METABOLIC_PROCESS	80	0.6347	1.96612	0	0.0400247	0.392	3600	tags=55%, list=18%, signal=67%
GOBP_REGULATION_OF_CHROMOSOME_ORGANIZATION	257	0.603866	1.96612	0	0.0396361	0.392	4388	tags=58%, list=22%, signal=73%
GOBP_POSITIVE_REGULATION_OF_DNA_BIOSYNTHETIC_PROCESS	65	0.632258	1.96252	0	0.0408381	0.405	4744	tags=65%, list=24%, signal=85%
GOBP_NUCLEAR_EXPORT	197	0.619621	1.96227	0	0.0405617	0.406	5224	tags=66%, list=26%, signal=89%
GOBP_NEGATIVE_REGULATION_OF_DNA_METABOLIC_PROCESS	100	0.597103	1.95754	0	0.0419644	0.419	3961	tags=51%, list=20%, signal=63%
GOBP_KINETOCHORE_ORGANIZATION	20	0.837142	1.95741	0	0.041635	0.419	2377	tags=75%, list=12%, signal=85%
GOBP_POSITIVE_REGULATION_OF_TELOMERE_MAINTENANCE	50	0.673671	1.95631	0	0.0415566	0.423	4388	tags=68%, list=22%, signal=87%
GOBP_MEIOTIC_CHROMOSOME_SEPARATION	22	0.720685	1.9549	0	0.0417482	0.426	3036	tags=55%, list=15%, signal=64%
GOBP_CELL_CYCLE_DNA_REPLICATION	63	0.718801	1.95347	0.00383142	0.0417664	0.429	1408	tags=59%, list=7%, signal=63%
GOBP_NUCLEOBASE_CONTAINING_COMPOUND_TRANSPORT	246	0.578512	1.95317	0	0.041588	0.432	5662	tags=61%, list=29%, signal=84%
GOBP_CELLULAR_RESPONSE_TO_HEAT	112	0.605565	1.9518	0	0.0416556	0.437	4873	tags=61%, list=25%, signal=80%
GOBP_CELLULAR_RESPONSE_TO_LIGHT_STIMULUS	128	0.508557	1.94978	0	0.0422425	0.438	5410	tags=45%, list=27%, signal=61%
GOBP_POSITIVE_REGULATION_OF_CELL_CYCLE_ARREST	78	0.596638	1.94916	0	0.0421226	0.439	4407	tags=49%, list=22%, signal=62%
GOBP_MRNA_TRANSPORT	146	0.628255	1.948	0	0.0422297	0.444	5534	tags=70%, list=28%, signal=96%
GOBP_NEGATIVE_REGULATION_OF_DNA_REPLICATION	32	0.674453	1.94658	0	0.0423521	0.45	4267	tags=66%, list=22%, signal=84%
GOBP_PROTEIN_METHYLATION	151	0.591888	1.94386	0	0.0430426	0.456	5543	tags=64%, list=28%, signal=88%
GOBP_KINETOCHORE_ASSEMBLY	15	0.814692	1.94317	0.00194932	0.0430924	0.458	2377	tags=67%, list=12%, signal=76%
GOBP_NON_RECOMBINATIONAL_REPAIR	77	0.644638	1.94233	0	0.0432355	0.461	4098	tags=64%, list=21%, signal=80%
GOBP_NUCLEAR_TRANSPORT	337	0.568218	1.9421	0	0.0429826	0.462	5604	tags=59%, list=28%, signal=81%
GOBP_CHROMATIN_SILENCING	37	0.66705	1.94188	0	0.0426925	0.463	5313	tags=73%, list=27%, signal=100%
GOBP_MITOTIC_G2_DNA_DAMAGE_CHECKPOINT	20	0.735829	1.94123	0	0.0426256	0.463	496	tags=40%, list=3%, signal=41%
GOBP_RESPONSE_TO_HEAT	153	0.550215	1.94118	0	0.0422895	0.463	5033	tags=52%, list=25%, signal=70%
GOBP_PROTEIN_LOCALIZATION_TO_CHROMOSOME_CENTROMERIC_REGION	23	0.780984	1.9404	0.0019305	0.0423096	0.464	3472	tags=83%, list=18%, signal=100%
GOBP_REGULATION_OF_ATP_METABOLIC_PROCESS	107	0.536776	1.9401	0.00178253	0.0420359	0.464	4874	tags=50%, list=25%, signal=67%
GOBP_NUCLEOTIDE_EXCISION_REPAIR	107	0.610348	1.93966	0	0.0419738	0.466	4834	tags=61%, list=24%, signal=80%
GOBP_REGULATION_OF_MEIOTIC_NUCLEAR_DIVISION	30	0.616916	1.93961	0.00546448	0.0416601	0.466	439	tags=20%, list=2%, signal=20%
GOBP_REGULATION_OF_TRANSLATIONAL_INITIATION	80	0.619111	1.93893	0	0.0416196	0.466	3819	tags=56%, list=19%, signal=69%
GOBP_CHROMOSOME_ORGANIZATION_INVOLVED_IN_MEIOTIC_CELL_CYCLE	55	0.592882	1.9384	0.00553506	0.041382	0.466	393	tags=25%, list=2%, signal=26%
GOBP_MITOTIC_METAPHASE_PLATE_CONGRESSION	49	0.670869	1.93661	0.0131579	0.0418193	0.473	1857	tags=47%, list=9%, signal=52%
GOBP_CELLULAR_RESPONSE_TO_IONIZING_RADIATION	63	0.61049	1.93571	0	0.0418685	0.476	5622	tags=63%, list=28%, signal=88%
GOBP_NEGATIVE_REGULATION_OF_CELL_CYCLE_G1_S_PHASE_TRANSITION	102	0.567584	1.93472	0	0.0419609	0.48	4407	tags=47%, list=22%, signal=60%
GOBP_REGULATION_OF_MRNA_CATABOLIC_PROCESS	201	0.567551	1.93336	0	0.0423966	0.484	5244	tags=55%, list=27%, signal=74%
GOBP_NEGATIVE_REGULATION_OF_RNA_CATABOLIC_PROCESS	61	0.621239	1.93308	0	0.0423084	0.487	5350	tags=61%, list=27%, signal=83%
GOBP_POSITIVE_REGULATION_OF_GENE_EXPRESSION_EPIGENETIC	44	0.632794	1.93148	0	0.0426294	0.489	4445	tags=64%, list=23%, signal=82%
GOBP_SIGNAL_TRANSDUCTION_IN_RESPONSE_TO_DNA_DAMAGE	124	0.566207	1.92909	0	0.0432459	0.493	4407	tags=49%, list=22%, signal=63%
GOBP_REGULATION_OF_DNA_DEPENDENT_DNA_REPLICATION	46	0.700367	1.92892	0	0.0429967	0.493	4369	tags=78%, list=22%, signal=100%
GOBP_FEMALE_MEIOTIC_NUCLEAR_DIVISION	23	0.703986	1.92866	0.00378788	0.0428611	0.494	1912	tags=43%, list=10%, signal=48%
GOBP_MRNA_3_END_PROCESSING	96	0.639187	1.92854	0	0.0426501	0.494	5037	tags=70%, list=25%, signal=93%
GOBP_HISTONE_H3_K4_METHYLATION	52	0.656715	1.92821	0	0.0424374	0.495	5225	tags=69%, list=26%, signal=94%
GOBP_REGULATION_OF_CELL_CYCLE_ARREST	103	0.55374	1.9272	0	0.0427721	0.498	4539	tags=45%, list=23%, signal=58%
GOBP_MISMATCH_REPAIR	33	0.70841	1.91844	0	0.0463437	0.524	3838	tags=70%, list=19%, signal=86%
GOBP_MITOTIC_SISTER_CHROMATID_COHESION	22	0.731545	1.91817	0	0.046135	0.524	4382	tags=77%, list=22%, signal=99%
GOBP_REGULATION_OF_MRNA_3_END_PROCESSING	27	0.718731	1.91571	0.0019802	0.0466929	0.531	3787	tags=70%, list=19%, signal=87%
GOBP_MRNA_EXPORT_FROM_NUCLEUS	110	0.650979	1.91497	0	0.0467517	0.533	5197	tags=74%, list=26%, signal=99%
GOBP_GENE_SILENCING	195	0.58204	1.91368	0	0.0469916	0.534	5584	tags=62%, list=28%, signal=86%
GOBP_REGULATION_OF_RESPONSE_TO_DNA_DAMAGE_STIMULUS	197	0.55421	1.91356	0	0.0467421	0.535	4810	tags=52%, list=24%, signal=68%
GOBP_TRNA_TRANSPORT	35	0.77197	1.91143	0	0.0473936	0.544	2927	tags=83%, list=15%, signal=97%
GOBP_MACROMOLECULE_METHYLATION	267	0.560425	1.91027	0	0.0477496	0.548	6404	tags=65%, list=32%, signal=95%
GOBP_PEPTIDYL_LYSINE_MODIFICATION	367	0.561981	1.90919	0	0.0479301	0.552	6452	tags=66%, list=33%, signal=97%
GOBP_POSITIVE_REGULATION_OF_TELOMERE_MAINTENANCE_VIA_TELOMERE_LENGTHENING	36	0.696295	1.90912	0	0.0476428	0.552	4388	tags=75%, list=22%, signal=96%
GOBP_MICROTUBULE_ORGANIZING_CENTER_ORGANIZATION	135	0.588583	1.90819	0	0.0478218	0.553	3298	tags=49%, list=17%, signal=58%
GOBP_CENTROSOME_DUPLICATION	69	0.636413	1.90718	0	0.0479835	0.558	4726	tags=67%, list=24%, signal=87%
GOBP_NEGATIVE_REGULATION_OF_TRANSLATIONAL_INITIATION	19	0.691288	1.90637	0	0.0481442	0.559	3201	tags=63%, list=16%, signal=75%
GOBP_REGULATION_OF_DNA_BIOSYNTHETIC_PROCESS	103	0.589553	1.90566	0	0.0482479	0.562	4744	tags=56%, list=24%, signal=74%
GOBP_ALDEHYDE_BIOSYNTHETIC_PROCESS	15	0.689371	1.90514	0	0.0481486	0.563	2618	tags=47%, list=13%, signal=54%
GOBP_RESPONSE_TO_RADIATION	429	0.477701	1.90489	0	0.0479825	0.564	5494	tags=43%, list=28%, signal=58%
GOBP_DNA_SYNTHESIS_INVOLVED_IN_DNA_REPAIR	49	0.628107	1.90452	0	0.0478268	0.566	5377	tags=69%, list=27%, signal=95%
GOBP_REGULATION_OF_CELL_DIVISION	165	0.510714	1.90361	0	0.0480337	0.57	2066	tags=25%, list=10%, signal=28%
GOBP_MITOTIC_RECOMBINATION	23	0.699658	1.90352	0	0.0477982	0.57	4092	tags=70%, list=21%, signal=88%
GOBP_REGULATION_OF_HISTONE_H3_K4_METHYLATION	27	0.664757	1.90248	0	0.0480109	0.573	5543	tags=70%, list=28%, signal=98%
GOBP_REGULATION_OF_DNA_RECOMBINATION	83	0.595542	1.90246	0.0019084	0.0477422	0.574	4348	tags=54%, list=22%, signal=69%
GOBP_PROTEIN_ACETYLATION	193	0.556746	1.90193	0	0.0476793	0.574	5581	tags=59%, list=28%, signal=81%
GOBP_MRNA_PROCESSING	494	0.575619	1.89648	0	0.0501444	0.59	4944	tags=59%, list=25%, signal=76%
GOBP_DNA_STRAND_ELONGATION	25	0.812533	1.89397	0	0.0508976	0.595	3300	tags=96%, list=17%, signal=115%
GOBP_POSITIVE_REGULATION_OF_DNA_REPAIR	62	0.587509	1.89214	0	0.0516476	0.6	3891	tags=53%, list=20%, signal=66%
GOBP_PROTEIN_MODIFICATION_BY_SMALL_PROTEIN_REMOVAL	287	0.548786	1.89195	0	0.0514159	0.6	6350	tags=59%, list=32%, signal=86%
GOBP_PEPTIDYL_LYSINE_METHYLATION	106	0.604948	1.89154	0.00192308	0.0513192	0.6	5543	tags=67%, list=28%, signal=93%
GOBP_NUCLEOBASE_METABOLIC_PROCESS	33	0.645235	1.89138	0.003663	0.0510628	0.6	1203	tags=39%, list=6%, signal=42%
GOBP_POSITIVE_REGULATION_OF_CYCLIN_DEPENDENT_PROTEIN_KINASE_ACTIVITY	32	0.649005	1.89022	0	0.0512511	0.602	4367	tags=56%, list=22%, signal=72%
GOBP_PROTEIN_MONOUBIQUITINATION	63	0.659625	1.8899	0.00199203	0.0511343	0.604	3864	tags=68%, list=20%, signal=85%
GOBP_NEGATIVE_REGULATION_OF_MEIOTIC_CELL_CYCLE	17	0.685708	1.88912	0.00188324	0.0511116	0.604	1630	tags=35%, list=8%, signal=38%
GOBP_NEGATIVE_REGULATION_OF_MRNA_CATABOLIC_PROCESS	51	0.602071	1.88704	0	0.0518842	0.612	4855	tags=53%, list=25%, signal=70%
GOBP_RESPONSE_TO_VITAMIN_A	18	0.649765	1.886	0.00350263	0.0520432	0.616	350	tags=17%, list=2%, signal=17%
GOBP_CYTOKINESIS	154	0.551035	1.88386	0.00187266	0.0527273	0.62	4603	tags=45%, list=23%, signal=59%
GOBP_RNA_POLYADENYLATION	42	0.654143	1.88227	0	0.0531354	0.625	3787	tags=62%, list=19%, signal=76%
GOBP_PEPTIDYL_ARGININE_METHYLATION	15	0.695116	1.88135	0.0019084	0.0533152	0.629	3555	tags=53%, list=18%, signal=65%
GOBP_HISTONE_METHYLATION	122	0.586403	1.88046	0	0.0533308	0.631	5543	tags=62%, list=28%, signal=86%
GOBP_PYRUVATE_METABOLIC_PROCESS	146	0.522706	1.88001	0.0035524	0.0533038	0.633	6482	tags=57%, list=33%, signal=84%
GOBP_TELOMERE_MAINTENANCE_VIA_TELOMERE_LENGTHENING	75	0.632873	1.87972	0	0.0531529	0.633	4983	tags=68%, list=25%, signal=91%
GOBP_TELOMERE_MAINTENANCE_VIA_SEMI_CONSERVATIVE_REPLICATION	27	0.743832	1.87969	0.00193424	0.0528788	0.633	1408	tags=63%, list=7%, signal=68%
GOBP_COVALENT_CHROMATIN_MODIFICATION	441	0.560506	1.87885	0	0.053018	0.637	5543	tags=60%, list=28%, signal=81%
GOBP_CHROMATIN_ORGANIZATION_INVOLVED_IN_REGULATION_OF_TRANSCRIPTION	82	0.595701	1.87775	0	0.0533147	0.642	5379	tags=66%, list=27%, signal=90%
GOBP_HISTONE_UBIQUITINATION	47	0.669102	1.87706	0	0.0532676	0.643	4810	tags=74%, list=24%, signal=98%
GOBP_REGULATION_OF_EXIT_FROM_MITOSIS	15	0.704581	1.87695	0.00383877	0.0530068	0.643	1723	tags=47%, list=9%, signal=51%
GOBP_HISTONE_MONOUBIQUITINATION	29	0.700525	1.87639	0	0.0529981	0.644	4677	tags=79%, list=24%, signal=104%
GOBP_REGULATION_OF_CELL_CYCLE_CHECKPOINT	30	0.687641	1.8763	0.0019305	0.0527417	0.644	4735	tags=73%, list=24%, signal=96%
GOBP_TRANSCRIPTION_BY_RNA_POLYMERASE_I	58	0.613053	1.87413	0.00375235	0.0536512	0.647	3225	tags=53%, list=16%, signal=64%
GOBP_ATTACHMENT_OF_SPINDLE_MICROTUBULES_TO_KINETOCHORE	31	0.73714	1.87409	0.00775194	0.0533816	0.647	768	tags=55%, list=4%, signal=57%
GOBP_REGULATION_OF_GENE_SILENCING	100	0.582674	1.87393	0	0.0531673	0.647	3343	tags=49%, list=17%, signal=59%
GOBP_DNA_DAMAGE_RESPONSE_SIGNAL_TRANSDUCTION_BY_P53_CLASS_MEDIATOR	102	0.561002	1.87355	0	0.0531024	0.65	4407	tags=48%, list=22%, signal=62%
GOBP_REGULATION_OF_SPINDLE_ORGANIZATION	39	0.617081	1.87274	0.0018622	0.0533564	0.654	2030	tags=44%, list=10%, signal=48%
GOBP_CHROMATIN_REMODELING	172	0.577571	1.87244	0	0.0531795	0.654	4913	tags=58%, list=25%, signal=77%
GOBP_NUCLEOTIDE_PHOSPHORYLATION	128	0.527296	1.87122	0.00362319	0.0534308	0.656	6488	tags=57%, list=33%, signal=84%
GOBP_PROTEIN_SUMOYLATION	78	0.617647	1.87096	0	0.0533546	0.656	5853	tags=72%, list=30%, signal=102%
GOBP_DNA_STRAND_ELONGATION_INVOLVED_IN_DNA_REPLICATION	19	0.854375	1.86964	0	0.0537857	0.66	1101	tags=84%, list=6%, signal=89%
GOBP_REGULATION_OF_DOUBLE_STRAND_BREAK_REPAIR_VIA_HOMOLOGOUS_RECOMBINATION	40	0.647475	1.86893	0.00191205	0.0538156	0.662	4939	tags=68%, list=25%, signal=90%
GOBP_METHYLATION	316	0.522461	1.86846	0	0.0537644	0.664	6404	tags=59%, list=32%, signal=86%
GOBP_REGULATION_OF_TELOMERE_MAINTENANCE	75	0.647162	1.86674	0	0.0542944	0.669	4388	tags=67%, list=22%, signal=85%
GOBP_DNA_DOUBLE_STRAND_BREAK_PROCESSING	24	0.718727	1.86523	0	0.0546547	0.672	3914	tags=71%, list=20%, signal=88%
GOBP_NUCLEIC_ACID_PHOSPHODIESTER_BOND_HYDROLYSIS	284	0.529778	1.86518	0.00184843	0.0543876	0.672	5060	tags=51%, list=26%, signal=67%
GOBP_RESOLUTION_OF_MEIOTIC_RECOMBINATION_INTERMEDIATES	15	0.722139	1.86451	0.00191205	0.0543119	0.672	3036	tags=60%, list=15%, signal=71%
GOBP_REGULATION_OF_CELLULAR_RESPONSE_TO_HEAT	76	0.619627	1.86359	0	0.0544674	0.674	4388	tags=62%, list=22%, signal=79%
GOBP_MITOTIC_G2_M_TRANSITION_CHECKPOINT	33	0.66452	1.86251	0.00390625	0.054816	0.677	4267	tags=61%, list=22%, signal=77%
GOBP_RNA_SPLICING_VIA_TRANSESTERIFICATION_REACTIONS	345	0.582913	1.86199	0	0.0548082	0.677	5595	tags=65%, list=28%, signal=89%
GOBP_NEGATIVE_REGULATION_OF_GENE_EXPRESSION_EPIGENETIC	55	0.635112	1.86051	0	0.0552889	0.684	5313	tags=73%, list=27%, signal=99%
GOBP_DNA_TEMPLATED_TRANSCRIPTION_TERMINATION	71	0.628523	1.85956	0	0.0554808	0.686	4759	tags=68%, list=24%, signal=89%
GOBP_BLASTOCYST_DEVELOPMENT	90	0.495144	1.85902	0	0.05558	0.687	4573	tags=37%, list=23%, signal=47%
GOBP_RNA_SPLICING	437	0.567432	1.85828	0	0.055842	0.687	4847	tags=57%, list=25%, signal=74%
GOBP_REGULATION_OF_GENERATION_OF_PRECURSOR_METABOLITES_AND_ENERGY	147	0.498764	1.85679	0.00175131	0.0562608	0.689	5398	tags=46%, list=27%, signal=62%
GOBP_NEGATIVE_REGULATION_OF_CELL_DIVISION	16	0.694525	1.85632	0.00561798	0.0561855	0.69	2968	tags=50%, list=15%, signal=59%
GOBP_REGULATION_OF_DOUBLE_STRAND_BREAK_REPAIR	72	0.586185	1.85623	0.00189753	0.0559542	0.692	3961	tags=50%, list=20%, signal=62%
GOBP_RESPONSE_TO_X_RAY	31	0.664553	1.85569	0	0.0559582	0.693	3941	tags=58%, list=20%, signal=72%
GOBP_PROTEIN_INSERTION_INTO_MITOCHONDRIAL_MEMBRANE_INVOLVED_IN_APOPTOTIC_SIGNALING_PATHWAY	30	0.637502	1.85533	0	0.0558944	0.694	5016	tags=67%, list=25%, signal=89%
GOBP_REGULATION_OF_MRNA_PROCESSING	138	0.595482	1.85458	0	0.0560138	0.695	4913	tags=60%, list=25%, signal=79%
GOBP_NEGATIVE_REGULATION_OF_ORGANELLE_ORGANIZATION	319	0.50029	1.8543	0.00182482	0.0559331	0.695	5076	tags=43%, list=26%, signal=57%
GOBP_POSITIVE_REGULATION_OF_CELL_DIVISION	83	0.518349	1.85357	0.00176056	0.0561265	0.697	1857	tags=20%, list=9%, signal=23%
GOBP_POSITIVE_REGULATION_OF_RESPONSE_TO_DNA_DAMAGE_STIMULUS	93	0.530954	1.85106	0	0.0572571	0.702	3891	tags=45%, list=20%, signal=56%
GOBP_POSITIVE_REGULATION_OF_TRANSLATION	126	0.54203	1.84765	0	0.0587521	0.707	4919	tags=49%, list=25%, signal=65%
GOBP_PROTEIN_CONTAINING_COMPLEX_LOCALIZATION	271	0.548158	1.8452	0.00191939	0.0596498	0.711	5828	tags=58%, list=30%, signal=82%
GOBP_NUCLEOSIDE_MONOPHOSPHATE_BIOSYNTHETIC_PROCESS	40	0.627565	1.84472	0.00183824	0.0596145	0.711	3834	tags=55%, list=19%, signal=68%
GOBP_PROTEIN_ACYLATION	234	0.522603	1.84443	0	0.0594716	0.711	6444	tags=60%, list=33%, signal=88%
GOBP_POSITIVE_REGULATION_BY_HOST_OF_VIRAL_TRANSCRIPTION	16	0.743364	1.84441	0	0.0592103	0.711	4034	tags=75%, list=20%, signal=94%
GOBP_HISTONE_MRNA_METABOLIC_PROCESS	22	0.68229	1.84437	0.00193424	0.0589756	0.711	4211	tags=73%, list=21%, signal=92%
GOBP_NUCLEOSIDE_DIPHOSPHATE_METABOLIC_PROCESS	151	0.507739	1.84312	0.0035524	0.0594124	0.714	6488	tags=55%, list=33%, signal=81%
GOBP_TRANSCRIPTION_INITIATION_FROM_RNA_POLYMERASE_I_PROMOTER	32	0.657874	1.8415	0.00373134	0.0600256	0.717	2984	tags=56%, list=15%, signal=66%
GOBP_POSTREPLICATION_REPAIR	49	0.631741	1.84065	0	0.0603203	0.72	5284	tags=71%, list=27%, signal=97%
GOBP_REGULATION_OF_OXIDATIVE_STRESS_INDUCED_INTRINSIC_APOPTOTIC_SIGNALING_PATHWAY	27	0.619883	1.83982	0	0.0604005	0.722	3376	tags=44%, list=17%, signal=54%
GOBP_CENTRIOLE_ASSEMBLY	43	0.647544	1.83975	0	0.0601863	0.722	4726	tags=70%, list=24%, signal=92%
GOBP_REGULATION_OF_TELOMERE_MAINTENANCE_VIA_TELOMERE_LENGTHENING	57	0.656161	1.83728	0	0.0613007	0.729	4388	tags=68%, list=22%, signal=88%
GOBP_RESPONSE_TO_TEMPERATURE_STIMULUS	217	0.471522	1.83641	0	0.0615564	0.732	4915	tags=41%, list=25%, signal=53%
GOBP_ANAPHASE_PROMOTING_COMPLEX_DEPENDENT_CATABOLIC_PROCESS	81	0.671289	1.8352	0.00576923	0.0621141	0.737	2137	tags=46%, list=11%, signal=51%
GOBP_OOCYTE_DIFFERENTIATION	43	0.51317	1.8316	0.00859107	0.063709	0.744	855	tags=19%, list=4%, signal=19%
GOBP_REGULATION_OF_TYPE_I_INTERFERON_MEDIATED_SIGNALING_PATHWAY	34	0.650532	1.83068	0	0.0639621	0.747	5424	tags=74%, list=27%, signal=101%
GOBP_REGULATION_OF_CELLULAR_AMIDE_METABOLIC_PROCESS	398	0.507253	1.82917	0	0.0646172	0.749	5561	tags=52%, list=28%, signal=70%
GOBP_REGULATION_OF_TRANSCRIPTION_INVOLVED_IN_G1_S_TRANSITION_OF_MITOTIC_CELL_CYCLE	34	0.665673	1.8291	0.00580271	0.0644094	0.749	4739	tags=71%, list=24%, signal=93%
GOBP_REGULATION_OF_NUCLEOTIDE_METABOLIC_PROCESS	112	0.497047	1.82881	0.0035524	0.064292	0.749	6185	tags=51%, list=31%, signal=74%
GOBP_REGULATION_OF_CARBOHYDRATE_CATABOLIC_PROCESS	85	0.551264	1.82775	0	0.0646316	0.751	6302	tags=62%, list=32%, signal=91%
GOBP_REGULATION_OF_MRNA_SPLICING_VIA_SPLICEOSOME	100	0.590654	1.82738	0.00198807	0.064554	0.752	5570	tags=64%, list=28%, signal=89%
GOBP_POSITIVE_REGULATION_OF_PROTEIN_LOCALIZATION_TO_NUCLEUS	84	0.55638	1.82632	0	0.0648029	0.753	4048	tags=44%, list=20%, signal=55%
GOBP_HISTONE_DEUBIQUITINATION	22	0.712763	1.82606	0	0.0647286	0.753	3892	tags=77%, list=20%, signal=96%
GOBP_CELL_AGING	99	0.513749	1.82556	0	0.0647123	0.755	4531	tags=41%, list=23%, signal=53%
GOBP_POSITIVE_REGULATION_OF_TYPE_I_INTERFERON_PRODUCTION	73	0.584929	1.82504	0.00195695	0.0647226	0.755	6506	tags=71%, list=33%, signal=106%
GOBP_ALTERNATIVE_MRNA_SPLICING_VIA_SPLICEOSOME	73	0.591103	1.82414	0	0.0650575	0.757	4913	tags=59%, list=25%, signal=78%
GOBP_POSITIVE_REGULATION_OF_CELLULAR_AMIDE_METABOLIC_PROCESS	152	0.520703	1.82408	0	0.0648584	0.758	5244	tags=48%, list=27%, signal=65%
GOBP_TERMINATION_OF_RNA_POLYMERASE_II_TRANSCRIPTION	35	0.656204	1.82337	0.00192678	0.0649905	0.76	5037	tags=74%, list=25%, signal=100%
GOBP_CELLULAR_RESPONSE_TO_GAMMA_RADIATION	26	0.609025	1.82244	0.00186916	0.0653023	0.763	5469	tags=62%, list=28%, signal=85%
GOBP_NCRNA_EXPORT_FROM_NUCLEUS	36	0.743497	1.82162	0	0.0655417	0.768	3640	tags=86%, list=18%, signal=105%
GOBP_PEPTIDYL_LYSINE_ACETYLATION	164	0.552269	1.82047	0	0.0658837	0.77	5581	tags=60%, list=28%, signal=83%
GOBP_DNA_TEMPLATED_TRANSCRIPTION_ELONGATION	107	0.591145	1.82036	0.00194932	0.0656696	0.77	4835	tags=60%, list=24%, signal=79%
GOBP_POSITIVE_REGULATION_OF_CHROMOSOME_ORGANIZATION	156	0.561821	1.81913	0	0.0659942	0.77	5379	tags=60%, list=27%, signal=81%
GOBP_NUCLEUS_ORGANIZATION	116	0.534454	1.81773	0	0.0665779	0.774	2075	tags=34%, list=11%, signal=37%
GOBP_DNA_METHYLATION	68	0.533023	1.81729	0.00361011	0.0666143	0.775	6117	tags=56%, list=31%, signal=81%
GOBP_PROTEIN_LOCALIZATION_TO_CHROMATIN	22	0.712437	1.81715	0	0.0663996	0.775	2148	tags=59%, list=11%, signal=66%
GOBP_PYRIMIDINE_CONTAINING_COMPOUND_METABOLIC_PROCESS	80	0.505159	1.81712	0.00179533	0.0661483	0.775	3796	tags=34%, list=19%, signal=42%
GOBP_CENTROSOME_SEPARATION	15	0.730141	1.81695	0.00772201	0.0659608	0.775	4726	tags=80%, list=24%, signal=105%
GOBP_REGULATION_OF_GENE_SILENCING_BY_RNA	91	0.567316	1.81369	0	0.0678396	0.786	2927	tags=45%, list=15%, signal=53%
GOBP_NEGATIVE_REGULATION_OF_RESPONSE_TO_DNA_DAMAGE_STIMULUS	72	0.550067	1.81336	0	0.0677804	0.786	5013	tags=51%, list=25%, signal=69%
GOBP_MEMBRANE_DISASSEMBLY	15	0.710691	1.81205	0.0056926	0.0682096	0.788	231	tags=33%, list=1%, signal=34%
GOBP_REGULATION_OF_MITOCHONDRIAL_OUTER_MEMBRANE_PERMEABILIZATION_INVOLVED_IN_APOPTOTIC_SIGNALING_PATHWAY	43	0.572597	1.81193	0.00191205	0.0680356	0.788	5016	tags=49%, list=25%, signal=65%
GOBP_N_TERMINAL_PROTEIN_AMINO_ACID_ACETYLATION	16	0.679987	1.81192	0.00194932	0.0677749	0.788	5322	tags=69%, list=27%, signal=94%
GOBP_TRANSCRIPTION_COUPLED_NUCLEOTIDE_EXCISION_REPAIR	73	0.608042	1.81172	0.00551471	0.0676367	0.788	4834	tags=60%, list=24%, signal=80%
GOBP_CILIARY_BASAL_BODY_PLASMA_MEMBRANE_DOCKING	94	0.599732	1.81124	0	0.0676435	0.789	3337	tags=52%, list=17%, signal=62%
GOBP_FORMATION_OF_EXTRACHROMOSOMAL_CIRCULAR_DNA	15	0.729298	1.81102	0.00190476	0.0675031	0.789	4092	tags=73%, list=21%, signal=92%
GOBP_ERYTHROCYTE_HOMEOSTASIS	114	0.514845	1.8098	0	0.068043	0.792	6113	tags=51%, list=31%, signal=73%
GOBP_NUCLEOBASE_BIOSYNTHETIC_PROCESS	18	0.744852	1.80926	0.00373832	0.0680549	0.793	2692	tags=67%, list=14%, signal=77%
GOBP_MITOCHONDRIAL_OUTER_MEMBRANE_PERMEABILIZATION	53	0.562148	1.80918	0	0.0678466	0.793	5016	tags=49%, list=25%, signal=66%
GOBP_G0_TO_G1_TRANSITION	44	0.625625	1.80913	0	0.0676059	0.793	4677	tags=64%, list=24%, signal=83%
GOBP_HISTONE_H2A_UBIQUITINATION	26	0.679174	1.80824	0	0.0677753	0.795	5182	tags=81%, list=26%, signal=109%
GOBP_DNA_MODIFICATION	114	0.496336	1.80683	0	0.0685366	0.797	6254	tags=49%, list=32%, signal=71%
GOBP_REGULATION_OF_RNA_SPLICING	144	0.567711	1.80585	0.00201207	0.068935	0.798	4913	tags=55%, list=25%, signal=72%
GOBP_RNA_PHOSPHODIESTER_BOND_HYDROLYSIS_EXONUCLEOLYTIC	41	0.630124	1.80503	0.00387597	0.0691395	0.798	4407	tags=61%, list=22%, signal=78%
GOBP_REGULATION_OF_CELL_CYCLE_G1_S_PHASE_TRANSITION	160	0.510222	1.80434	0	0.0693918	0.8	4902	tags=44%, list=25%, signal=58%
GOBP_PROTEIN_LOCALIZATION_TO_NUCLEUS	268	0.508296	1.80331	0	0.0696023	0.801	5870	tags=51%, list=30%, signal=72%
GOBP_PROTEIN_LOCALIZATION_TO_CHROMOSOME_TELOMERIC_REGION	28	0.709879	1.80328	0	0.06936	0.801	4259	tags=79%, list=22%, signal=100%
GOBP_ESTABLISHMENT_OF_PROTEIN_LOCALIZATION_TO_CHROMOSOME	23	0.730849	1.80216	0.00759013	0.0698312	0.803	3761	tags=78%, list=19%, signal=97%
GOBP_IMPORT_INTO_NUCLEUS	160	0.525091	1.80135	0	0.0700439	0.805	5604	tags=52%, list=28%, signal=73%
GOBP_APOPTOTIC_MITOCHONDRIAL_CHANGES	110	0.507413	1.79952	0.00369004	0.0708739	0.807	4635	tags=43%, list=23%, signal=56%
GOBP_NEGATIVE_REGULATION_OF_CELL_CYCLE_G2_M_PHASE_TRANSITION	101	0.58699	1.7977	0.0093633	0.0717777	0.811	3262	tags=43%, list=17%, signal=51%
GOBP_REPLICATIVE_SENESCENCE	16	0.632696	1.79759	0.00546448	0.0715788	0.812	3941	tags=44%, list=20%, signal=55%
GOBP_POSITIVE_REGULATION_OF_MITOCHONDRIAL_OUTER_MEMBRANE_PERMEABILIZATION_INVOLVED_IN_APOPTOTIC_SIGNALING_PATHWAY	34	0.596295	1.79694	0.00194175	0.0717658	0.813	5016	tags=59%, list=25%, signal=79%
GOBP_SPLICEOSOMAL_COMPLEX_ASSEMBLY	57	0.609862	1.79655	0.00199203	0.0718108	0.816	4760	tags=63%, list=24%, signal=83%
GOBP_RRNA_CONTAINING_RIBONUCLEOPROTEIN_COMPLEX_EXPORT_FROM_NUCLEUS	15	0.743991	1.79624	0.00392157	0.0717295	0.817	3640	tags=80%, list=18%, signal=98%
GOBP_CYTOSKELETON_DEPENDENT_CYTOKINESIS	83	0.558773	1.79481	0.00556586	0.0722472	0.821	4726	tags=48%, list=24%, signal=63%
GOBP_RNA_DEPENDENT_DNA_BIOSYNTHETIC_PROCESS	65	0.622209	1.79411	0.00189753	0.0724678	0.821	4983	tags=68%, list=25%, signal=90%
GOBP_ESTABLISHMENT_OF_PROTEIN_LOCALIZATION_TO_TELOMERE	18	0.775851	1.79357	0.00581395	0.0725617	0.822	3761	tags=89%, list=19%, signal=110%
GOBP_DNA_TEMPLATED_TRANSCRIPTION_INITIATION	226	0.509667	1.79332	0	0.0724165	0.822	4108	tags=42%, list=21%, signal=52%
GOBP_PURINE_NUCLEOBASE_METABOLIC_PROCESS	18	0.673023	1.79229	0.0150094	0.072989	0.827	1203	tags=44%, list=6%, signal=47%
GOBP_REGULATION_OF_PROTEIN_LOCALIZATION_TO_NUCLEUS	127	0.517608	1.79141	0	0.0733064	0.827	4199	tags=43%, list=21%, signal=54%
GOBP_DNA_DAMAGE_RESPONSE_DETECTION_OF_DNA_DAMAGE	38	0.639835	1.78702	0.00738007	0.0757656	0.834	5182	tags=66%, list=26%, signal=89%
GOBP_POSITIVE_REGULATION_OF_MITOCHONDRION_ORGANIZATION	80	0.516855	1.78471	0.00184843	0.0770473	0.838	5414	tags=50%, list=27%, signal=69%
GOBP_REGULATION_OF_DNA_TEMPLATED_TRANSCRIPTION_ELONGATION	50	0.624757	1.78414	0	0.0772354	0.838	4835	tags=66%, list=24%, signal=87%
GOBP_POSITIVE_REGULATION_OF_TELOMERASE_ACTIVITY	33	0.609439	1.78364	0.00561798	0.0772736	0.838	4744	tags=64%, list=24%, signal=84%
GOBP_HISTONE_PHOSPHORYLATION	36	0.594956	1.78306	0.00994036	0.0775243	0.84	4162	tags=50%, list=21%, signal=63%
GOBP_PROTEIN_LOCALIZATION_TO_CYTOSKELETON	58	0.598059	1.78004	0	0.0792627	0.843	6179	tags=71%, list=31%, signal=103%
GOBP_DNA_UNWINDING_INVOLVED_IN_DNA_REPLICATION	15	0.760188	1.77895	0.00192308	0.0798039	0.845	3704	tags=80%, list=19%, signal=98%
GOBP_REGULATION_OF_TELOMERASE_ACTIVITY	46	0.58858	1.77802	0.00374532	0.0802295	0.846	4388	tags=59%, list=22%, signal=75%
GOBP_DNA_REPLICATION_CHECKPOINT	17	0.76713	1.77777	0.00808081	0.0801152	0.846	809	tags=59%, list=4%, signal=61%
GOBP_POSITIVE_REGULATION_OF_MITOTIC_NUCLEAR_DIVISION	43	0.543466	1.77726	0.00711744	0.0802415	0.846	4382	tags=37%, list=22%, signal=48%
GOBP_TELOMERE_MAINTENANCE_VIA_RECOMBINATION	15	0.713356	1.77698	0.00194553	0.08022	0.846	4092	tags=73%, list=21%, signal=92%
GOBP_POSITIVE_REGULATION_OF_MRNA_METABOLIC_PROCESS	83	0.569395	1.77624	0	0.0804593	0.846	5243	tags=58%, list=27%, signal=78%
GOBP_RESPONSE_TO_LIGHT_STIMULUS	309	0.438365	1.77482	0.00181159	0.0812735	0.851	5494	tags=39%, list=28%, signal=53%
GOBP_REGULATION_OF_CHROMATIN_ORGANIZATION	169	0.536751	1.77448	0	0.0812551	0.852	5543	tags=59%, list=28%, signal=82%
GOBP_DNA_METHYLATION_OR_DEMETHYLATION	92	0.507786	1.77362	0.00185874	0.0815178	0.855	6117	tags=52%, list=31%, signal=75%
GOBP_NEGATIVE_REGULATION_OF_DNA_RECOMBINATION	28	0.648294	1.77316	0.00194553	0.0815573	0.855	4348	tags=61%, list=22%, signal=78%
GOBP_REGULATION_OF_PROTEIN_POLYUBIQUITINATION	22	0.638031	1.77292	0.00387597	0.0814454	0.855	4810	tags=64%, list=24%, signal=84%
GOBP_RNA_PHOSPHODIESTER_BOND_HYDROLYSIS	148	0.516255	1.77269	0.00554529	0.0813065	0.857	5028	tags=51%, list=25%, signal=67%
GOBP_GLUTAMINE_METABOLIC_PROCESS	21	0.638444	1.77126	0.00371747	0.0819994	0.857	2705	tags=43%, list=14%, signal=50%
GOBP_EXIT_FROM_MITOSIS	27	0.588906	1.771	0.0132827	0.0818777	0.857	2477	tags=37%, list=13%, signal=42%
GOBP_REGULATION_OF_SISTER_CHROMATID_COHESION	18	0.710653	1.77089	0	0.0817428	0.857	4382	tags=78%, list=22%, signal=100%
GOBP_TRANSCRIPTION_ELONGATION_FROM_RNA_POLYMERASE_I_PROMOTER	27	0.642588	1.77004	0.0095057	0.0821998	0.858	4445	tags=63%, list=23%, signal=81%
GOBP_REGULATION_OF_MRNA_POLYADENYLATION	16	0.691735	1.76946	0	0.0823556	0.858	3411	tags=63%, list=17%, signal=75%
GOBP_NEGATIVE_REGULATION_OF_CELLULAR_AMIDE_METABOLIC_PROCESS	151	0.505676	1.7684	0	0.0827846	0.859	5561	tags=52%, list=28%, signal=72%
GOBP_POSITIVE_REGULATION_OF_MEMBRANE_PERMEABILITY	63	0.527205	1.7683	0.00187617	0.0826179	0.859	4635	tags=44%, list=23%, signal=58%
GOBP_POSITIVE_REGULATION_OF_HISTONE_H3_K4_METHYLATION	18	0.676118	1.76824	0.00572519	0.0823855	0.859	5543	tags=72%, list=28%, signal=100%
GOBP_PROTEIN_IMPORT	190	0.510393	1.76824	0	0.082133	0.859	6825	tags=59%, list=35%, signal=90%
GOBP_NEGATIVE_REGULATION_OF_CHROMATIN_ORGANIZATION	51	0.57202	1.76603	0	0.0834053	0.861	5313	tags=63%, list=27%, signal=86%
GOBP_POSITIVE_REGULATION_OF_OXIDOREDUCTASE_ACTIVITY	54	0.513451	1.76499	0.00361664	0.0839165	0.863	5459	tags=44%, list=28%, signal=61%
GOBP_TRANSLESION_SYNTHESIS	39	0.61486	1.76493	0.00564972	0.0837045	0.863	5284	tags=67%, list=27%, signal=91%
GOBP_TELOMERASE_RNA_LOCALIZATION	19	0.780919	1.76485	0.00561798	0.0834845	0.863	1955	tags=74%, list=10%, signal=82%
GOBP_ATTACHMENT_OF_MITOTIC_SPINDLE_MICROTUBULES_TO_KINETOCHORE	15	0.744219	1.76323	0.0225989	0.0842955	0.863	482	tags=53%, list=2%, signal=55%
GOBP_SNO_S_RNA_METABOLIC_PROCESS	15	0.710205	1.76285	0.00994036	0.0842566	0.863	1797	tags=47%, list=9%, signal=51%
GOBP_AMINO_ACID_ACTIVATION	30	0.72021	1.76195	0.00943396	0.0846759	0.866	3965	tags=80%, list=20%, signal=100%
GOBP_TERMINATION_OF_RNA_POLYMERASE_I_TRANSCRIPTION	27	0.639531	1.76192	0.00929368	0.0844222	0.866	2984	tags=56%, list=15%, signal=65%
GOBP_HISTONE_H4_ACETYLATION	67	0.572854	1.76183	0	0.084252	0.866	5543	tags=64%, list=28%, signal=89%
GOBP_REGULATION_OF_DNA_TEMPLATED_TRANSCRIPTION_INITIATION	42	0.577568	1.76168	0.00375235	0.0841138	0.866	5131	tags=55%, list=26%, signal=74%
GOBP_POSITIVE_REGULATION_OF_DOUBLE_STRAND_BREAK_REPAIR	33	0.583886	1.76137	0.011194	0.0840711	0.867	5123	tags=61%, list=26%, signal=82%
GOBP_REGULATION_OF_ALTERNATIVE_MRNA_SPLICING_VIA_SPLICEOSOME	57	0.582147	1.76069	0.00192678	0.0843216	0.867	6309	tags=67%, list=32%, signal=98%
GOBP_ACTIVATION_OF_CYSTEINE_TYPE_ENDOPEPTIDASE_ACTIVITY	15	0.673669	1.75746	0.00572519	0.0863508	0.873	2602	tags=47%, list=13%, signal=54%
GOBP_CELLULAR_SENESCENCE	65	0.519414	1.757	0	0.086384	0.874	3941	tags=42%, list=20%, signal=52%
GOBP_PROTEIN_LOCALIZATION_TO_MICROTUBULE_ORGANIZING_CENTER	35	0.638935	1.75658	0	0.0863718	0.874	6179	tags=86%, list=31%, signal=125%
GOBP_REGULATION_OF_SPINDLE_CHECKPOINT	15	0.715357	1.75602	0.0157171	0.0865584	0.875	4711	tags=73%, list=24%, signal=96%
GOBP_NEGATIVE_REGULATION_OF_TELOMERE_MAINTENANCE	32	0.658651	1.75562	0	0.0866035	0.875	4259	tags=66%, list=22%, signal=84%
GOBP_MYELOID_CELL_HOMEOSTASIS	138	0.49614	1.7541	0	0.0874487	0.877	6113	tags=49%, list=31%, signal=71%
GOBP_CELLULAR_COMPONENT_DISASSEMBLY_INVOLVED_IN_EXECUTION_PHASE_OF_APOPTOSIS	33	0.541791	1.75337	0.00369686	0.0876408	0.877	3411	tags=33%, list=17%, signal=40%
GOBP_NEGATIVE_REGULATION_OF_MRNA_PROCESSING	29	0.671757	1.75168	0.00803213	0.0885272	0.879	3600	tags=69%, list=18%, signal=84%
GOBP_POSITIVE_REGULATION_OF_DNA_RECOMBINATION	38	0.580719	1.75013	0.00198413	0.0894443	0.881	4722	tags=55%, list=24%, signal=72%
GOBP_NUCLEOTIDE_EXCISION_REPAIR_DNA_GAP_FILLING	23	0.679798	1.74976	0.011194	0.0894256	0.881	5175	tags=78%, list=26%, signal=106%
GOBP_SPINDLE_LOCALIZATION	52	0.592449	1.74934	0.00562852	0.0894799	0.881	3666	tags=48%, list=19%, signal=59%
GOBP_REGULATION_OF_TRANSCRIPTION_ELONGATION_FROM_RNA_POLYMERASE_II_PROMOTER	30	0.642644	1.74847	0	0.0898023	0.881	5223	tags=67%, list=26%, signal=90%
GOBP_NEGATIVE_REGULATION_OF_DNA_DEPENDENT_DNA_REPLICATION	16	0.726783	1.74817	0.00578035	0.0898485	0.881	4114	tags=81%, list=21%, signal=103%
GOBP_INTRINSIC_APOPTOTIC_SIGNALING_PATHWAY_IN_RESPONSE_TO_OXIDATIVE_STRESS	43	0.555414	1.74728	0.00182149	0.0902507	0.881	3853	tags=42%, list=20%, signal=52%
GOBP_TETRAHYDROFOLATE_METABOLIC_PROCESS	17	0.645794	1.74681	0.00543478	0.0903589	0.882	2189	tags=47%, list=11%, signal=53%
GOBP_HISTONE_H2A_MONOUBIQUITINATION	17	0.676819	1.74657	0.00192678	0.0902985	0.882	4677	tags=76%, list=24%, signal=100%
GOBP_REGULATION_OF_SPINDLE_ASSEMBLY	25	0.613238	1.74635	0.00377358	0.0901764	0.882	2030	tags=44%, list=10%, signal=49%
GOBP_HOMOLOGOUS_CHROMOSOME_SEGREGATION	48	0.541892	1.74342	0.0164534	0.0921124	0.883	5720	tags=46%, list=29%, signal=64%
GOBP_MEMBRANE_DOCKING	179	0.516969	1.74297	0.00189753	0.0922237	0.883	5827	tags=57%, list=29%, signal=80%
GOBP_EXECUTION_PHASE_OF_APOPTOSIS	90	0.447408	1.74176	0	0.0929401	0.883	3411	tags=27%, list=17%, signal=32%
GOBP_NEGATIVE_REGULATION_OF_CELLULAR_CATABOLIC_PROCESS	234	0.470829	1.74053	0.00368324	0.0936556	0.886	7142	tags=53%, list=36%, signal=81%
GOBP_PURINE_NUCLEOSIDE_MONOPHOSPHATE_BIOSYNTHETIC_PROCESS	21	0.664909	1.73928	0.0133588	0.0943319	0.886	3834	tags=62%, list=19%, signal=77%
GOBP_REGULATION_OF_MITOTIC_SPINDLE_ASSEMBLY	18	0.63666	1.739	0.0111732	0.0942784	0.886	1147	tags=39%, list=6%, signal=41%
GOBP_POSITIVE_REGULATION_OF_NUCLEAR_DIVISION	56	0.495321	1.73842	0.0154639	0.0945956	0.886	5398	tags=38%, list=27%, signal=51%
GOBP_CARBOHYDRATE_CATABOLIC_PROCESS	188	0.468381	1.73839	0.00356506	0.0943633	0.886	6497	tags=47%, list=33%, signal=69%
GOBP_ANATOMICAL_STRUCTURE_HOMEOSTASIS	428	0.437743	1.73783	0	0.0944701	0.888	5074	tags=36%, list=26%, signal=48%
GOBP_TRANSCRIPTION_INITIATION_FROM_RNA_POLYMERASE_II_PROMOTER	184	0.489279	1.73749	0	0.0944468	0.889	4108	tags=39%, list=21%, signal=49%
GOBP_CELL_CYCLE_ARREST	227	0.467972	1.73708	0.00182149	0.0944893	0.889	5224	tags=41%, list=26%, signal=55%
GOBP_REGULATION_OF_UBIQUITIN_DEPENDENT_PROTEIN_CATABOLIC_PROCESS	155	0.501653	1.73673	0	0.0944706	0.889	5253	tags=48%, list=27%, signal=65%
GOBP_RIBONUCLEOPROTEIN_COMPLEX_SUBUNIT_ORGANIZATION	189	0.573413	1.73662	0.0209125	0.0942762	0.889	6501	tags=68%, list=33%, signal=100%
GOBP_MITOCHONDRIAL_RNA_METABOLIC_PROCESS	43	0.651577	1.73587	0.0140845	0.0945911	0.889	3750	tags=65%, list=19%, signal=80%
GOBP_MRNA_CLEAVAGE	21	0.626898	1.73487	0.00581395	0.0950839	0.89	3274	tags=62%, list=17%, signal=74%
GOBP_NUCLEAR_TRANSCRIBED_MRNA_CATABOLIC_PROCESS_DEADENYLATION_DEPENDENT_DECAY	70	0.550317	1.73465	0.00194932	0.0950247	0.892	5512	tags=57%, list=28%, signal=79%
GOBP_POSITIVE_REGULATION_OF_ESTABLISHMENT_OF_PROTEIN_LOCALIZATION_TO_MITOCHONDRION	58	0.553289	1.73441	0.00194932	0.0949622	0.892	4635	tags=52%, list=23%, signal=67%
GOBP_NCRNA_METABOLIC_PROCESS	439	0.539566	1.73293	0.028463	0.0958316	0.892	6614	tags=61%, list=33%, signal=89%
GOBP_REGULATION_OF_CARBOHYDRATE_METABOLIC_PROCESS	192	0.458077	1.73163	0	0.0965677	0.892	6302	tags=48%, list=32%, signal=70%
GOBP_RNA_CATABOLIC_PROCESS	396	0.513637	1.73061	0.0277264	0.0970057	0.892	5561	tags=49%, list=28%, signal=66%
GOBP_POSITIVE_REGULATION_OF_DNA_TEMPLATED_TRANSCRIPTION_INITIATION	35	0.589117	1.73035	0.00192678	0.0970057	0.893	4795	tags=54%, list=24%, signal=72%
GOBP_ENDONUCLEOLYTIC_CLEAVAGE_INVOLVED_IN_RRNA_PROCESSING	15	0.74083	1.73013	0.00772201	0.0968921	0.893	4012	tags=80%, list=20%, signal=100%
GOBP_MODULATION_BY_VIRUS_OF_HOST_PROCESS	29	0.591966	1.72712	0.00382409	0.0990729	0.895	3929	tags=52%, list=20%, signal=64%
GOBP_NUCLEOTIDE_EXCISION_REPAIR_DNA_INCISION	39	0.607038	1.7258	0.00938086	0.099881	0.896	4834	tags=59%, list=24%, signal=78%
GOBP_CELLULAR_RESPONSE_TO_ABIOTIC_STIMULUS	319	0.448907	1.72536	0	0.0999643	0.897	5632	tags=41%, list=29%, signal=57%
GOBP_NEGATIVE_REGULATION_OF_PROTEASOMAL_UBIQUITIN_DEPENDENT_PROTEIN_CATABOLIC_PROCESS	34	0.560274	1.72444	0.00368324	0.100444	0.897	6838	tags=62%, list=35%, signal=94%
GOBP_DEOXYRIBONUCLEOTIDE_METABOLIC_PROCESS	39	0.559795	1.72317	0.0111732	0.101202	0.898	3762	tags=38%, list=19%, signal=47%
GOBP_MICROTUBULE_DEPOLYMERIZATION	42	0.561737	1.72307	0.0094697	0.101052	0.898	2635	tags=36%, list=13%, signal=41%
GOBP_POSITIVE_REGULATION_OF_VIRAL_GENOME_REPLICATION	30	0.612259	1.72295	0.00588235	0.100915	0.898	5826	tags=70%, list=29%, signal=99%
GOBP_ERROR_FREE_TRANSLESION_SYNTHESIS	21	0.678246	1.72273	0.0131579	0.100883	0.898	2852	tags=62%, list=14%, signal=72%
GOBP_POSITIVE_REGULATION_OF_DNA_TEMPLATED_TRANSCRIPTION_ELONGATION	26	0.65583	1.72238	0	0.100904	0.899	4835	tags=73%, list=24%, signal=97%
GOBP_SOMATIC_DIVERSIFICATION_OF_IMMUNE_RECEPTORS	65	0.567172	1.72108	0.00390625	0.101632	0.899	4348	tags=51%, list=22%, signal=65%
GOBP_NEGATIVE_REGULATION_OF_PROTEASOMAL_PROTEIN_CATABOLIC_PROCESS	46	0.525678	1.72062	0.00185529	0.101726	0.899	6838	tags=57%, list=35%, signal=86%
GOBP_MITOTIC_CYTOKINESIS	69	0.560621	1.72055	0.0150943	0.101491	0.899	4726	tags=52%, list=24%, signal=68%
GOBP_POSITIVE_REGULATION_OF_HISTONE_METHYLATION	34	0.614859	1.71976	0.00199203	0.101753	0.899	5543	tags=71%, list=28%, signal=98%
GOBP_MATURATION_OF_5_8S_RRNA_FROM_TRICISTRONIC_RRNA_TRANSCRIPT_SSU_RRNA_5_8S_RRNA_LSU_RRNA	24	0.677787	1.71935	0.0153846	0.101873	0.9	3296	tags=67%, list=17%, signal=80%
GOBP_MODULATION_OF_PROCESS_OF_OTHER_ORGANISM_INVOLVED_IN_SYMBIOTIC_INTERACTION	95	0.493983	1.71925	0	0.101666	0.9	4186	tags=39%, list=21%, signal=49%
GOBP_MULTI_ORGANISM_LOCALIZATION	64	0.567799	1.71819	0.00585938	0.102312	0.9	6185	tags=69%, list=31%, signal=100%
GOBP_REGULATION_OF_HISTONE_MODIFICATION	136	0.5184	1.71647	0.00193798	0.103557	0.902	6493	tags=63%, list=33%, signal=94%
GOBP_REGULATION_OF_MICROTUBULE_BASED_PROCESS	217	0.464968	1.71626	0.00368324	0.103477	0.902	7300	tags=56%, list=37%, signal=87%
GOBP_PROTEIN_K48_LINKED_UBIQUITINATION	59	0.573269	1.71614	0.00773694	0.103305	0.902	5182	tags=59%, list=26%, signal=80%
GOBP_HISTONE_H3_ACETYLATION	58	0.541823	1.71596	0	0.103193	0.903	6419	tags=64%, list=32%, signal=94%
GOBP_NUCLEOSIDE_SALVAGE	15	0.638939	1.71475	0.00943396	0.103991	0.903	2345	tags=40%, list=12%, signal=45%
GOBP_INTRINSIC_APOPTOTIC_SIGNALING_PATHWAY_IN_RESPONSE_TO_DNA_DAMAGE_BY_P53_CLASS_MEDIATOR	43	0.531461	1.7131	0.0075188	0.105109	0.905	5013	tags=47%, list=25%, signal=62%
GOBP_RIBONUCLEOSIDE_MONOPHOSPHATE_BIOSYNTHETIC_PROCESS	32	0.597143	1.71306	0.0186567	0.104883	0.905	3834	tags=53%, list=19%, signal=66%
GOBP_INTRINSIC_APOPTOTIC_SIGNALING_PATHWAY_IN_RESPONSE_TO_DNA_DAMAGE	98	0.488427	1.71185	0.0018018	0.105556	0.906	5013	tags=40%, list=25%, signal=53%
GOBP_REGULATION_OF_NUCLEASE_ACTIVITY	22	0.630116	1.7107	0.0178926	0.106229	0.907	3853	tags=59%, list=20%, signal=73%
GOBP_RIBONUCLEOPROTEIN_COMPLEX_BIOGENESIS	413	0.567111	1.71025	0.0305344	0.10631	0.909	6627	tags=67%, list=34%, signal=99%
GOBP_POSITIVE_REGULATION_OF_MRNA_SPLICING_VIA_SPLICEOSOME	23	0.608215	1.71019	0.00392157	0.106089	0.909	3158	tags=48%, list=16%, signal=57%
GOBP_TYPE_I_INTERFERON_PRODUCTION	120	0.541249	1.70924	0.0077821	0.106549	0.91	5303	tags=58%, list=27%, signal=78%
GOBP_POSITIVE_REGULATION_OF_TRANSLATIONAL_INITIATION	30	0.586608	1.70923	0.00193424	0.106293	0.91	6365	tags=60%, list=32%, signal=88%
GOBP_PROTEIN_POLYUBIQUITINATION	326	0.488633	1.70916	0.00739372	0.106092	0.91	4810	tags=46%, list=24%, signal=59%
GOBP_NEGATIVE_REGULATION_OF_HISTONE_MODIFICATION	42	0.570228	1.70834	0.004	0.10647	0.91	5313	tags=62%, list=27%, signal=85%
GOBP_POSITIVE_REGULATION_OF_TRANSCRIPTION_INITIATION_FROM_RNA_POLYMERASE_II_PROMOTER	28	0.600116	1.70804	0.00779727	0.106494	0.91	3941	tags=54%, list=20%, signal=67%
GOBP_PORE_COMPLEX_ASSEMBLY	19	0.633752	1.70771	0.00766283	0.106446	0.91	2547	tags=47%, list=13%, signal=54%
GOBP_POSITIVE_REGULATION_OF_TRANSCRIPTION_BY_RNA_POLYMERASE_I	22	0.644515	1.70706	0.0115385	0.10674	0.91	3708	tags=59%, list=19%, signal=73%
GOBP_ESTABLISHMENT_OF_ORGANELLE_LOCALIZATION	413	0.474522	1.70634	0.00369686	0.107063	0.911	7016	tags=56%, list=36%, signal=86%
GOBP_TRANSCRIPTION_PREINITIATION_COMPLEX_ASSEMBLY	35	0.598433	1.70593	0.0038835	0.10715	0.911	4795	tags=60%, list=24%, signal=79%
GOBP_MALE_MEIOTIC_NUCLEAR_DIVISION	43	0.499875	1.70578	0.0216306	0.107002	0.911	4204	tags=28%, list=21%, signal=35%
GOBP_REGULATION_OF_MITOCHONDRIAL_MEMBRANE_PERMEABILITY	69	0.508174	1.70565	0.0075188	0.106866	0.911	4635	tags=42%, list=23%, signal=55%
GOBP_MRNA_SPLICE_SITE_SELECTION	31	0.602044	1.70559	0.00595238	0.106666	0.912	4760	tags=61%, list=24%, signal=81%
GOBP_APOPTOTIC_DNA_FRAGMENTATION	22	0.569532	1.70558	0.00559702	0.106404	0.912	3411	tags=41%, list=17%, signal=49%
GOBP_PEPTIDYL_LYSINE_TRIMETHYLATION	37	0.629095	1.70512	0.00587084	0.106548	0.912	5543	tags=76%, list=28%, signal=105%
GOBP_DNA_LIGATION	15	0.656923	1.70457	0.0149254	0.106785	0.912	3543	tags=60%, list=18%, signal=73%
GOBP_REGULATION_OF_UBIQUITIN_PROTEIN_TRANSFERASE_ACTIVITY	53	0.522988	1.70447	0.0110497	0.106599	0.912	7659	tags=66%, list=39%, signal=108%
GOBP_POSITIVE_REGULATION_OF_INTERFERON_ALPHA_PRODUCTION	22	0.655854	1.70116	0.00988142	0.109048	0.915	5269	tags=73%, list=27%, signal=99%
GOBP_INTRINSIC_APOPTOTIC_SIGNALING_PATHWAY	267	0.447791	1.70066	0	0.10927	0.915	5112	tags=39%, list=26%, signal=51%
GOBP_MODULATION_BY_VIRUS_OF_HOST_CELLULAR_PROCESS	18	0.63046	1.70029	0.00390625	0.10935	0.915	3609	tags=56%, list=18%, signal=68%
GOBP_NEGATIVE_REGULATION_OF_CATABOLIC_PROCESS	289	0.449809	1.6997	0.00183486	0.109579	0.915	7214	tags=51%, list=37%, signal=79%
GOBP_DEMETHYLATION	69	0.521671	1.69875	0.00571429	0.110046	0.915	5182	tags=51%, list=26%, signal=69%
GOBP_NUCLEOTIDE_EXCISION_REPAIR_PREINCISION_COMPLEX_STABILIZATION	21	0.651009	1.6984	0.00961539	0.11005	0.916	4157	tags=62%, list=21%, signal=78%
GOBP_NEGATIVE_REGULATION_OF_OXIDATIVE_STRESS_INDUCED_INTRINSIC_APOPTOTIC_SIGNALING_PATHWAY	19	0.603696	1.69813	0.00912409	0.110013	0.917	3376	tags=42%, list=17%, signal=51%
GOBP_REGULATION_OF_TELOMERE_CAPPING	26	0.621985	1.69714	0	0.110676	0.917	4388	tags=62%, list=22%, signal=79%
GOBP_MODULATION_OF_PROCESS_OF_OTHER_ORGANISM	120	0.457246	1.69464	0.00176367	0.112679	0.919	6687	tags=45%, list=34%, signal=68%
GOBP_REGULATION_OF_MICROTUBULE_CYTOSKELETON_ORGANIZATION	133	0.482936	1.6945	0.00377358	0.112527	0.919	7245	tags=60%, list=37%, signal=94%
GOBP_NCRNA_TRANSCRIPTION	99	0.540355	1.69361	0.0136187	0.113015	0.919	4070	tags=53%, list=21%, signal=66%
GOBP_POSITIVE_REGULATION_OF_INTERFERON_BETA_PRODUCTION	32	0.603504	1.69285	0.00795229	0.113462	0.921	6383	tags=69%, list=32%, signal=101%
GOBP_SOMATIC_DIVERSIFICATION_OF_IMMUNOGLOBULINS	55	0.570937	1.69059	0.00788955	0.115286	0.924	2835	tags=44%, list=14%, signal=51%
GOBP_REGULATION_OF_PROTEASOMAL_UBIQUITIN_DEPENDENT_PROTEIN_CATABOLIC_PROCESS	126	0.496328	1.69019	0.00543478	0.115359	0.924	4238	tags=42%, list=21%, signal=53%
GOBP_NEGATIVE_REGULATION_OF_TELOMERE_MAINTENANCE_VIA_TELOMERE_LENGTHENING	24	0.662751	1.68859	0	0.116579	0.926	3375	tags=63%, list=17%, signal=75%
GOBP_PROTEIN_PHOSPHOPANTETHEINYLATION	316	0.452455	1.68774	0.00189394	0.117036	0.926	6361	tags=44%, list=32%, signal=64%
GOBP_ERROR_PRONE_TRANSLESION_SYNTHESIS	21	0.638888	1.68763	0.0207547	0.1169	0.926	2590	tags=52%, list=13%, signal=60%
GOBP_TRANSCRIPTION_BY_RNA_POLYMERASE_III	45	0.553834	1.68728	0.00769231	0.116917	0.926	4525	tags=56%, list=23%, signal=72%
GOBP_TRANSCRIPTION_ELONGATION_FROM_RNA_POLYMERASE_II_PROMOTER	81	0.550911	1.68673	0.0214008	0.117118	0.926	4835	tags=53%, list=24%, signal=70%
GOBP_MATURATION_OF_SSU_RRNA	46	0.629931	1.6864	0.0247148	0.11709	0.926	4187	tags=57%, list=21%, signal=72%
GOBP_NCRNA_PROCESSING	366	0.536919	1.68517	0.0455408	0.117909	0.926	6614	tags=60%, list=33%, signal=89%
GOBP_NEGATIVE_REGULATION_OF_PROTEOLYSIS_INVOLVED_IN_CELLULAR_PROTEIN_CATABOLIC_PROCESS	61	0.502821	1.68507	0.0165441	0.11771	0.927	6908	tags=54%, list=35%, signal=83%
GOBP_DNA_DAMAGE_RESPONSE_SIGNAL_TRANSDUCTION_RESULTING_IN_TRANSCRIPTION	18	0.593823	1.68477	0.0276753	0.117746	0.927	581	tags=28%, list=3%, signal=29%
GOBP_CLEAVAGE_INVOLVED_IN_RRNA_PROCESSING	27	0.660847	1.68469	0.0172084	0.117557	0.927	5306	tags=78%, list=27%, signal=106%
GOBP_PROTEIN_K63_LINKED_UBIQUITINATION	55	0.547862	1.68463	0.00193424	0.117343	0.927	6722	tags=65%, list=34%, signal=99%
GOBP_NEGATIVE_REGULATION_OF_MRNA_SPLICING_VIA_SPLICEOSOME	20	0.689284	1.68422	0.0226337	0.117507	0.927	4730	tags=80%, list=24%, signal=105%
GOBP_PYRIMIDINE_NUCLEOTIDE_METABOLIC_PROCESS	48	0.528775	1.68419	0.0092081	0.117269	0.927	3796	tags=38%, list=19%, signal=46%
GOBP_DOSAGE_COMPENSATION	15	0.723027	1.68391	0.00398406	0.117298	0.927	3819	tags=80%, list=19%, signal=99%
GOBP_NUCLEOTIDE_EXCISION_REPAIR_PREINCISION_COMPLEX_ASSEMBLY	29	0.60936	1.68356	0.0185185	0.117331	0.927	4619	tags=55%, list=23%, signal=72%
GOBP_REGULATION_OF_DNA_METHYLATION	22	0.612115	1.68355	0.00585938	0.117075	0.927	7118	tags=77%, list=36%, signal=121%
GOBP_RESPONSE_TO_ARSENIC_CONTAINING_SUBSTANCE	30	0.534965	1.68322	0.0233393	0.11709	0.927	4846	tags=47%, list=25%, signal=62%
GOBP_NUCLEOSIDE_MONOPHOSPHATE_METABOLIC_PROCESS	71	0.498872	1.68297	0.0108696	0.117006	0.927	3834	tags=38%, list=19%, signal=47%
GOBP_POSITIVE_REGULATION_OF_STEM_CELL_PROLIFERATION	22	0.56473	1.68265	0.00371058	0.117028	0.927	4419	tags=41%, list=22%, signal=53%
GOBP_PROTEIN_K48_LINKED_DEUBIQUITINATION	30	0.61479	1.68252	0.00796813	0.116887	0.927	4810	tags=60%, list=24%, signal=79%
GOBP_PROTEASOMAL_PROTEIN_CATABOLIC_PROCESS	465	0.465414	1.68181	0.00720721	0.117227	0.927	4874	tags=42%, list=25%, signal=55%
GOBP_NEGATIVE_REGULATION_OF_RNA_SPLICING	25	0.643088	1.68089	0.0269151	0.117767	0.928	4730	tags=68%, list=24%, signal=89%
GOBP_PEPTIDYL_ARGININE_MODIFICATION	27	0.532551	1.68038	0.0109489	0.117938	0.928	3555	tags=30%, list=18%, signal=36%
GOBP_PROTEIN_DNA_COMPLEX_DISASSEMBLY	18	0.644961	1.67962	0.0132325	0.118344	0.928	3624	tags=61%, list=18%, signal=75%
GOBP_REGULATION_OF_TRANSCRIPTION_INITIATION_FROM_RNA_POLYMERASE_II_PROMOTER	34	0.574744	1.67911	0.00387597	0.118561	0.928	3941	tags=50%, list=20%, signal=62%
GOBP_MODULATION_BY_SYMBIONT_OF_HOST_PROCESS	37	0.544071	1.679	0.00371058	0.118384	0.928	3929	tags=43%, list=20%, signal=54%
GOBP_REGULATION_OF_RELEASE_OF_CYTOCHROME_C_FROM_MITOCHONDRIA	42	0.521236	1.67875	0.0272727	0.118324	0.928	4635	tags=48%, list=23%, signal=62%
GOBP_POSITIVE_REGULATION_OF_METAPHASE_ANAPHASE_TRANSITION_OF_CELL_CYCLE	15	0.676711	1.67808	0.0134615	0.118685	0.928	4382	tags=73%, list=22%, signal=94%
GOBP_NEGATIVE_REGULATION_OF_CELL_AGING	23	0.578048	1.67716	0.0146252	0.119319	0.929	4392	tags=43%, list=22%, signal=56%
GOBP_HISTONE_H3_K9_MODIFICATION	44	0.573661	1.6763	0.00984252	0.119911	0.93	5543	tags=61%, list=28%, signal=85%
GOBP_REGULATION_OF_CENTROSOME_CYCLE	46	0.576869	1.67618	0.0094518	0.119704	0.93	6796	tags=76%, list=34%, signal=116%
GOBP_REGULATION_OF_TRANSCRIPTION_BY_RNA_POLYMERASE_III	22	0.603946	1.67582	0.00963391	0.11976	0.93	3685	tags=55%, list=19%, signal=67%
GOBP_REGULATION_OF_HISTONE_METHYLATION	57	0.577425	1.67558	0.006	0.119763	0.93	5543	tags=67%, list=28%, signal=92%
GOBP_HISTONE_H3_K9_METHYLATION	33	0.621558	1.67532	0.0139165	0.119725	0.93	5379	tags=70%, list=27%, signal=96%
GOBP_HISTONE_H4_K16_ACETYLATION	20	0.66421	1.67505	0.00201613	0.11973	0.93	5543	tags=80%, list=28%, signal=111%
GOBP_MITOCHONDRIAL_TRANSCRIPTION	15	0.649568	1.6749	0.0200803	0.119632	0.931	3750	tags=60%, list=19%, signal=74%
GOBP_REGULATION_OF_PROTEIN_MODIFICATION_BY_SMALL_PROTEIN_CONJUGATION_OR_REMOVAL	220	0.479013	1.67478	0.00759013	0.119453	0.931	5813	tags=50%, list=29%, signal=71%
GOBP_REGULATION_OF_ERYTHROCYTE_DIFFERENTIATION	44	0.562831	1.67422	0.00386847	0.119731	0.931	5503	tags=55%, list=28%, signal=75%
GOBP_REGULATION_OF_TRANSLATIONAL_INITIATION_IN_RESPONSE_TO_STRESS	15	0.688239	1.67415	0.0170778	0.119564	0.931	4897	tags=73%, list=25%, signal=97%
GOBP_TRNA_METABOLIC_PROCESS	151	0.566461	1.67407	0.0340909	0.119382	0.931	6614	tags=70%, list=33%, signal=104%
GOBP_POSITIVE_REGULATION_OF_ERYTHROCYTE_DIFFERENTIATION	29	0.59184	1.6739	0.00573614	0.119256	0.931	5503	tags=62%, list=28%, signal=86%
GOBP_ESTABLISHMENT_OF_PROTEIN_LOCALIZATION_TO_MITOCHONDRIAL_MEMBRANE	50	0.54216	1.67319	0.0173745	0.119678	0.932	5063	tags=56%, list=26%, signal=75%
GOBP_REGULATION_OF_CELL_AGING	46	0.508815	1.67266	0.0105448	0.119817	0.932	4392	tags=43%, list=22%, signal=56%
GOBP_FC_RECEPTOR_SIGNALING_PATHWAY	176	0.518785	1.67225	0.00970874	0.119912	0.933	7682	tags=71%, list=39%, signal=115%
GOBP_SOMATIC_RECOMBINATION_OF_IMMUNOGLOBULIN_GENE_SEGMENTS	48	0.569267	1.67218	0.00585938	0.119735	0.934	2703	tags=44%, list=14%, signal=51%
GOBP_THYMOCYTE_APOPTOTIC_PROCESS	16	0.610583	1.67112	0.0171429	0.120461	0.935	4931	tags=56%, list=25%, signal=75%
GOBP_PROTEIN_K11_LINKED_UBIQUITINATION	27	0.604516	1.67103	0.027027	0.120282	0.935	5586	tags=67%, list=28%, signal=93%
GOBP_POSITIVE_REGULATION_OF_NUCLEOCYTOPLASMIC_TRANSPORT	61	0.522035	1.67089	0	0.120138	0.935	6750	tags=61%, list=34%, signal=92%
GOBP_HOMOLOGOUS_CHROMOSOME_PAIRING_AT_MEIOSIS	41	0.524815	1.67012	0.027881	0.120527	0.935	5720	tags=44%, list=29%, signal=62%
GOBP_MATURATION_OF_5_8S_RRNA	34	0.625	1.67	0.0339623	0.120379	0.935	3296	tags=59%, list=17%, signal=70%
GOBP_MALE_MEIOSIS_I	22	0.545845	1.66983	0.0238908	0.120292	0.935	1905	tags=18%, list=10%, signal=20%
GOBP_MITOCHONDRIAL_TRANSMEMBRANE_TRANSPORT	87	0.501024	1.6684	0.0242991	0.121322	0.935	4526	tags=44%, list=23%, signal=56%
GOBP_MITOCHONDRIAL_GENOME_MAINTENANCE	21	0.599536	1.66812	0.00377358	0.121277	0.935	2834	tags=52%, list=14%, signal=61%
GOBP_RESPONSE_TO_SALT	16	0.586592	1.66734	0.0217391	0.121658	0.936	3411	tags=31%, list=17%, signal=38%
GOBP_TELOMERE_CAPPING	38	0.584766	1.66726	0.00580271	0.121482	0.936	4388	tags=55%, list=22%, signal=71%
GOBP_POSITIVE_REGULATION_OF_TELOMERE_CAPPING	17	0.614769	1.66721	0.0131579	0.121258	0.936	4388	tags=59%, list=22%, signal=76%
GOBP_PROTEIN_LOCALIZATION_TO_MITOCHONDRION	140	0.493862	1.66666	0.0183824	0.121538	0.936	7118	tags=59%, list=36%, signal=92%
GOBP_POSITIVE_REGULATION_OF_INTRACELLULAR_PROTEIN_TRANSPORT	175	0.46254	1.666	0	0.121874	0.937	6750	tags=54%, list=34%, signal=81%
GOBP_BIOLOGICAL_PROCESS_INVOLVED_IN_INTERACTION_WITH_SYMBIONT	89	0.431789	1.66411	0.011745	0.123526	0.939	4186	tags=28%, list=21%, signal=35%
GOBP_FEMALE_GAMETE_GENERATION	117	0.406594	1.66384	0.00662252	0.123529	0.939	4252	tags=26%, list=22%, signal=32%
GOBP_BINDING_OF_SPERM_TO_ZONA_PELLUCIDA	43	0.481663	1.66338	0.0151261	0.123681	0.939	3243	tags=23%, list=16%, signal=28%
GOBP_NEGATIVE_REGULATION_OF_CELLULAR_PROTEIN_CATABOLIC_PROCESS	73	0.475104	1.66312	0.00891266	0.12365	0.939	7142	tags=51%, list=36%, signal=79%
GOBP_PROTEIN_DESTABILIZATION	44	0.538132	1.6623	0.00574713	0.124176	0.939	5099	tags=55%, list=26%, signal=73%
GOBP_REGULATION_OF_CENTRIOLE_REPLICATION	20	0.673908	1.66223	0.00385356	0.123984	0.939	2544	tags=60%, list=13%, signal=69%
GOBP_PYRIMIDINE_NUCLEOBASE_METABOLIC_PROCESS	16	0.628019	1.66219	0.00560748	0.123779	0.939	674	tags=31%, list=3%, signal=32%
GOBP_POSITIVE_REGULATION_OF_UBIQUITIN_PROTEIN_TRANSFERASE_ACTIVITY	34	0.530357	1.65941	0.0288288	0.126238	0.942	7183	tags=62%, list=36%, signal=97%
GOBP_FC_RECEPTOR_MEDIATED_STIMULATORY_SIGNALING_PATHWAY	83	0.552294	1.65907	0.0211538	0.126273	0.942	7009	tags=75%, list=35%, signal=115%
GOBP_SNRNA_METABOLIC_PROCESS	42	0.543693	1.65817	0.0365854	0.126876	0.943	5028	tags=43%, list=25%, signal=57%
GOBP_REGULATION_OF_SMALL_MOLECULE_METABOLIC_PROCESS	406	0.404468	1.6577	0.00687285	0.127131	0.945	5989	tags=39%, list=30%, signal=55%
GOBP_REGULATION_OF_HEMATOPOIETIC_PROGENITOR_CELL_DIFFERENTIATION	89	0.524925	1.65478	0.0299625	0.12959	0.948	4795	tags=49%, list=24%, signal=65%
GOBP_POSITIVE_REGULATION_OF_RELEASE_OF_CYTOCHROME_C_FROM_MITOCHONDRIA	27	0.535559	1.65248	0.0207547	0.131565	0.949	5414	tags=52%, list=27%, signal=71%
GOBP_REGULATION_OF_NUCLEOBASE_CONTAINING_COMPOUND_TRANSPORT	16	0.71361	1.65226	0.00809717	0.131456	0.949	1705	tags=56%, list=9%, signal=62%
GOBP_NEGATIVE_REGULATION_OF_PROTEIN_CATABOLIC_PROCESS	116	0.438122	1.65225	0.0017452	0.131194	0.949	7188	tags=48%, list=36%, signal=75%
GOBP_NUCLEAR_TRANSCRIBED_MRNA_POLY_A_TAIL_SHORTENING	29	0.635116	1.65186	0.00198807	0.131286	0.949	4628	tags=62%, list=23%, signal=81%
GOBP_REGULATION_OF_RETINOIC_ACID_RECEPTOR_SIGNALING_PATHWAY	16	0.58738	1.65169	0.0134615	0.131174	0.949	5871	tags=56%, list=30%, signal=80%
GOBP_REGULATION_OF_ORGANELLE_ASSEMBLY	178	0.479622	1.65094	0.00378072	0.131568	0.949	7370	tags=60%, list=37%, signal=94%
GOBP_INTRINSIC_APOPTOTIC_SIGNALING_PATHWAY_BY_P53_CLASS_MEDIATOR	72	0.475892	1.65079	0.0127273	0.131441	0.949	5064	tags=40%, list=26%, signal=54%
GOBP_NEGATIVE_REGULATION_OF_UBIQUITIN_DEPENDENT_PROTEIN_CATABOLIC_PROCESS	47	0.530146	1.65013	0.0168856	0.13186	0.949	6908	tags=60%, list=35%, signal=91%
GOBP_POSITIVE_REGULATION_OF_UBIQUITIN_DEPENDENT_PROTEIN_CATABOLIC_PROCESS	99	0.48533	1.64979	0.00736648	0.131926	0.95	4409	tags=41%, list=22%, signal=53%
GOBP_NEGATIVE_REGULATION_OF_DNA_REPAIR	28	0.588752	1.64918	0.019305	0.132176	0.95	3883	tags=50%, list=20%, signal=62%
GOBP_CELLULAR_PROTEIN_CONTAINING_COMPLEX_LOCALIZATION	19	0.633375	1.64854	0.00585938	0.132549	0.95	3335	tags=42%, list=17%, signal=51%
GOBP_HISTONE_DEACETYLATION	74	0.517595	1.64805	0.0154143	0.132775	0.95	6493	tags=59%, list=33%, signal=88%
GOBP_MONOSACCHARIDE_BIOSYNTHETIC_PROCESS	90	0.454512	1.64748	0.0143113	0.133199	0.952	6226	tags=42%, list=32%, signal=61%
GOBP_BLASTOCYST_FORMATION	34	0.509673	1.64731	0.0160428	0.133125	0.952	4407	tags=38%, list=22%, signal=49%
GOBP_POSITIVE_REGULATION_OF_VASCULAR_ENDOTHELIAL_CELL_PROLIFERATION	15	0.59466	1.64681	0.0169492	0.133374	0.952	5398	tags=53%, list=27%, signal=73%
GOBP_MICROTUBULE_POLYMERIZATION_OR_DEPOLYMERIZATION	110	0.473505	1.64679	0.00756144	0.13313	0.952	5835	tags=46%, list=30%, signal=65%
GOBP_POSITIVE_REGULATION_OF_PROTEIN_MODIFICATION_BY_SMALL_PROTEIN_CONJUGATION_OR_REMOVAL	128	0.498458	1.64666	0.00754717	0.133006	0.952	4321	tags=44%, list=22%, signal=56%
GOBP_REGULATION_OF_CELLULAR_PROTEIN_CATABOLIC_PROCESS	241	0.454695	1.64641	0.00363636	0.132977	0.952	4874	tags=40%, list=25%, signal=53%
GOBP_POSITIVE_REGULATION_OF_RNA_SPLICING	37	0.560542	1.64593	0.00400802	0.133196	0.953	3473	tags=46%, list=18%, signal=56%
GOBP_MITOCHONDRIAL_TRANSPORT	241	0.458791	1.64591	0.0201097	0.132956	0.953	4526	tags=39%, list=23%, signal=51%
GOBP_RNA_METHYLATION	72	0.565058	1.64566	0.0153551	0.132929	0.953	6967	tags=74%, list=35%, signal=113%
GOBP_INTRA_S_DNA_DAMAGE_CHECKPOINT	16	0.667736	1.6449	0.0179641	0.133434	0.953	4619	tags=75%, list=23%, signal=98%
GOBP_POSITIVE_REGULATION_OF_MEIOTIC_CELL_CYCLE	21	0.567738	1.64351	0.0335196	0.134572	0.955	855	tags=24%, list=4%, signal=25%
GOBP_TRNA_MODIFICATION	82	0.558712	1.64106	0.0341556	0.136901	0.958	5794	tags=62%, list=29%, signal=88%
GOBP_BLASTOCYST_GROWTH	19	0.654716	1.64102	0.015873	0.13668	0.958	2383	tags=47%, list=12%, signal=54%
GOBP_NEURAL_TUBE_FORMATION	96	0.501044	1.64048	0.0131579	0.136913	0.958	6387	tags=52%, list=32%, signal=77%
GOBP_NEGATIVE_REGULATION_OF_DNA_TEMPLATED_TRANSCRIPTION_ELONGATION	17	0.648947	1.63903	0.0277228	0.138251	0.958	2516	tags=47%, list=13%, signal=54%
GOBP_POSITIVE_REGULATION_OF_CHROMATIN_ORGANIZATION	96	0.509362	1.63871	0.00585938	0.138304	0.958	5652	tags=55%, list=29%, signal=77%
GOBP_HISTONE_H2A_ACETYLATION	16	0.656171	1.63781	0.0171756	0.138973	0.958	3327	tags=63%, list=17%, signal=75%
GOBP_MITOCHONDRIAL_MEMBRANE_ORGANIZATION	115	0.480159	1.63775	0.0220183	0.138758	0.958	5859	tags=49%, list=30%, signal=69%
GOBP_MRNA_CIS_SPLICING_VIA_SPLICEOSOME	21	0.6332	1.63772	0.0159363	0.138523	0.958	5748	tags=76%, list=29%, signal=107%
GOBP_SPLICEOSOMAL_SNRNP_ASSEMBLY	39	0.645006	1.63702	0.0383142	0.138963	0.958	5964	tags=77%, list=30%, signal=110%
GOBP_CELLULAR_RESPONSE_TO_ARSENIC_CONTAINING_SUBSTANCE	18	0.595405	1.63674	0.0191571	0.138944	0.958	4279	tags=56%, list=22%, signal=71%
GOBP_RIBONUCLEOSIDE_MONOPHOSPHATE_METABOLIC_PROCESS	54	0.492774	1.63613	0.0234657	0.139269	0.959	5919	tags=50%, list=30%, signal=71%
GOBP_GLUCOSE_CATABOLIC_PROCESS	34	0.563341	1.63592	0.0429105	0.139228	0.959	6482	tags=59%, list=33%, signal=87%
GOBP_CYTOPLASMIC_PATTERN_RECOGNITION_RECEPTOR_SIGNALING_PATHWAY	66	0.522169	1.63543	0.00770713	0.139464	0.96	6383	tags=58%, list=32%, signal=85%
GOBP_PEPTIDYL_GLUTAMIC_ACID_MODIFICATION	28	0.52038	1.63509	0.0207156	0.139547	0.96	6031	tags=50%, list=31%, signal=72%
GOBP_MIRNA_METABOLIC_PROCESS	25	0.591979	1.63403	0.0238095	0.140349	0.961	5490	tags=64%, list=28%, signal=89%
GOBP_REGULATION_OF_STEM_CELL_DIFFERENTIATION	110	0.478005	1.63355	0.0292505	0.140623	0.961	4795	tags=40%, list=24%, signal=53%
GOBP_MODULATION_BY_SYMBIONT_OF_HOST_CELLULAR_PROCESS	24	0.568139	1.63274	0.00954198	0.14115	0.961	3609	tags=46%, list=18%, signal=56%
GOBP_REGULATION_OF_ESTABLISHMENT_OF_PROTEIN_LOCALIZATION_TO_MITOCHONDRION	70	0.506377	1.6321	0.00974659	0.141464	0.963	7118	tags=60%, list=36%, signal=93%
GOBP_REGULATION_OF_PROTEIN_ACETYLATION	74	0.484285	1.63196	0.00948767	0.141346	0.963	6397	tags=55%, list=32%, signal=82%
GOBP_MITOCHONDRION_MORPHOGENESIS	18	0.603954	1.63188	0.0266667	0.141154	0.963	2756	tags=50%, list=14%, signal=58%
GOBP_PEPTIDYL_THREONINE_MODIFICATION	121	0.4805	1.63126	0.00361011	0.141606	0.963	7593	tags=59%, list=38%, signal=95%
GOBP_TRNA_PROCESSING	119	0.547119	1.63079	0.0418251	0.141882	0.964	6710	tags=66%, list=34%, signal=100%
GOBP_HISTONE_H3_K4_TRIMETHYLATION	17	0.694314	1.63077	0.0182186	0.141655	0.964	5543	tags=82%, list=28%, signal=114%
GOBP_SNRNA_TRANSCRIPTION	71	0.532963	1.63044	0.0198413	0.141676	0.964	3700	tags=51%, list=19%, signal=62%
GOBP_POSITIVE_REGULATION_OF_MRNA_CATABOLIC_PROCESS	51	0.569563	1.62951	0.00592885	0.142382	0.964	5243	tags=59%, list=27%, signal=80%
GOBP_RNA_POLYMERASE_II_PREINITIATION_COMPLEX_ASSEMBLY	23	0.590506	1.62862	0.0311284	0.143061	0.965	3941	tags=52%, list=20%, signal=65%
GOBP_FOLIC_ACID_CONTAINING_COMPOUND_METABOLIC_PROCESS	25	0.555502	1.62828	0.0240296	0.143185	0.965	4368	tags=52%, list=22%, signal=67%
GOBP_RNA_MODIFICATION	153	0.508692	1.6282	0.0265152	0.142986	0.965	6974	tags=62%, list=35%, signal=95%
GOBP_REGULATION_OF_PROTEIN_STABILITY	276	0.441195	1.628	0.00364964	0.142927	0.965	5331	tags=42%, list=27%, signal=57%
GOBP_N_TERMINAL_PROTEIN_AMINO_ACID_MODIFICATION	28	0.558642	1.62709	0.0132576	0.143729	0.965	6559	tags=64%, list=33%, signal=96%
GOBP_TRNA_METHYLATION	37	0.609664	1.62704	0.0253906	0.143514	0.965	6367	tags=78%, list=32%, signal=115%
GOBP_REGULATION_OF_CIRCADIAN_RHYTHM	116	0.451047	1.62646	0.00552486	0.14384	0.965	4336	tags=34%, list=22%, signal=44%
GOBP_POSITIVE_REGULATION_OF_MONOOXYGENASE_ACTIVITY	32	0.527619	1.62638	0.0163934	0.143698	0.965	5459	tags=50%, list=28%, signal=69%
GOBP_NEGATIVE_REGULATION_OF_TELOMERE_MAINTENANCE_VIA_TELOMERASE	17	0.674084	1.62604	0.0121951	0.143784	0.965	3375	tags=65%, list=17%, signal=78%
GOBP_POLY_A_PLUS_MRNA_EXPORT_FROM_NUCLEUS	22	0.558749	1.62585	0.0310078	0.143726	0.965	5534	tags=50%, list=28%, signal=69%
GOBP_PURINE_NUCLEOSIDE_MONOPHOSPHATE_METABOLIC_PROCESS	41	0.516044	1.62573	0.0236364	0.143592	0.965	4757	tags=46%, list=24%, signal=61%
GOBP_NEGATIVE_REGULATION_OF_PROTEIN_ACETYLATION	23	0.550859	1.62521	0.0174419	0.143887	0.965	3343	tags=39%, list=17%, signal=47%
GOBP_PROTEIN_HETEROOLIGOMERIZATION	24	0.502059	1.62458	0.0198198	0.144266	0.965	5277	tags=42%, list=27%, signal=57%
GOBP_PYRIMIDINE_CONTAINING_COMPOUND_BIOSYNTHETIC_PROCESS	36	0.541164	1.62446	0.0220994	0.144104	0.965	3796	tags=39%, list=19%, signal=48%
GOBP_PURINE_CONTAINING_COMPOUND_METABOLIC_PROCESS	416	0.394473	1.62238	0.010118	0.146063	0.965	6244	tags=39%, list=32%, signal=56%
GOBP_PYRIMIDINE_NUCLEOSIDE_METABOLIC_PROCESS	34	0.509279	1.62234	0.02693	0.145846	0.965	1998	tags=24%, list=10%, signal=26%
GOBP_RIBOSOME_BIOGENESIS	284	0.547432	1.6221	0.0659134	0.145817	0.965	6627	tags=63%, list=34%, signal=93%
GOBP_RETROGRADE_TRANSPORT_ENDOSOME_TO_PLASMA_MEMBRANE	23	0.606559	1.62095	0.011236	0.146687	0.966	5774	tags=61%, list=29%, signal=86%
GOBP_POSITIVE_REGULATION_OF_PROTEOLYSIS_INVOLVED_IN_CELLULAR_PROTEIN_CATABOLIC_PROCESS	121	0.471889	1.62038	0.00558659	0.147006	0.966	4850	tags=43%, list=25%, signal=57%
GOBP_CELLULAR_RESPONSE_TO_CHEMICAL_STRESS	324	0.421051	1.62	0.00176056	0.147148	0.966	5729	tags=41%, list=29%, signal=57%
GOBP_POSITIVE_REGULATION_OF_VIRAL_PROCESS	89	0.480811	1.61915	0.0110906	0.147785	0.966	6821	tags=55%, list=35%, signal=84%
GOBP_ESTABLISHMENT_OF_MITOTIC_SPINDLE_LOCALIZATION	33	0.600109	1.6188	0.0189394	0.147832	0.967	2477	tags=42%, list=13%, signal=48%
GOBP_HETEROCHROMATIN_ORGANIZATION	48	0.535528	1.61814	0.0150094	0.148245	0.967	8187	tags=79%, list=41%, signal=135%
GOBP_REGULATION_OF_INTRINSIC_APOPTOTIC_SIGNALING_PATHWAY	147	0.437144	1.61787	0.0262697	0.14828	0.968	5076	tags=38%, list=26%, signal=51%
GOBP_RNA_SPLICING_VIA_ENDONUCLEOLYTIC_CLEAVAGE_AND_LIGATION	15	0.663356	1.61721	0.00968992	0.1487	0.968	4822	tags=73%, list=24%, signal=97%
GOBP_POSITIVE_REGULATION_OF_TELOMERASE_RNA_LOCALIZATION_TO_CAJAL_BODY	15	0.780493	1.61682	0.0225989	0.148827	0.968	1955	tags=73%, list=10%, signal=81%
GOBP_POSITIVE_REGULATION_OF_FIBROBLAST_PROLIFERATION	44	0.498178	1.61681	0.0313589	0.148566	0.968	2362	tags=20%, list=12%, signal=23%
GOBP_REGULATION_OF_CYTOPLASMIC_TRANSLATION	21	0.56556	1.61675	0.0117647	0.14836	0.968	3819	tags=43%, list=19%, signal=53%
GOBP_REGULATION_OF_PEPTIDYL_LYSINE_ACETYLATION	62	0.489162	1.61661	0.0115607	0.148289	0.968	6397	tags=58%, list=32%, signal=86%
GOBP_POSITIVE_REGULATION_OF_RESPONSE_TO_BIOTIC_STIMULUS	243	0.458411	1.61493	0.0398482	0.14986	0.968	6138	tags=48%, list=31%, signal=68%
GOBP_CELLULAR_RESPONSE_TO_DRUG	62	0.466009	1.6149	0.014733	0.149628	0.968	5382	tags=37%, list=27%, signal=51%
GOBP_EMBRYONIC_CRANIAL_SKELETON_MORPHOGENESIS	45	0.514428	1.61454	0.0253623	0.149779	0.968	5750	tags=44%, list=29%, signal=63%
GOBP_POSITIVE_REGULATION_OF_INTRACELLULAR_TRANSPORT	211	0.445793	1.61327	0.00364964	0.150908	0.968	7125	tags=54%, list=36%, signal=83%
GOBP_REGULATION_OF_MITOCHONDRION_ORGANIZATION	144	0.451519	1.61261	0.00915751	0.151342	0.968	4783	tags=41%, list=24%, signal=54%
GOBP_REGULATION_OF_UBIQUITIN_PROTEIN_LIGASE_ACTIVITY	23	0.572549	1.61204	0.0444015	0.151777	0.968	2384	tags=35%, list=12%, signal=40%
GOBP_REGULATION_OF_PROTEASOMAL_PROTEIN_CATABOLIC_PROCESS	173	0.462224	1.61161	0.00739372	0.151993	0.968	6350	tags=49%, list=32%, signal=72%
GOBP_REGULATION_OF_GLUCONEOGENESIS	40	0.482264	1.61037	0.0133843	0.15312	0.968	6046	tags=50%, list=31%, signal=72%
GOBP_NEGATIVE_REGULATION_OF_DNA_BINDING	51	0.469335	1.60904	0.0214669	0.15426	0.968	7611	tags=57%, list=39%, signal=92%
GOBP_NUCLEOBASE_CONTAINING_SMALL_MOLECULE_INTERCONVERSION	26	0.578566	1.60849	0.038674	0.154605	0.968	3762	tags=42%, list=19%, signal=52%
GOBP_IN_UTERO_EMBRYONIC_DEVELOPMENT	329	0.419756	1.60811	0.00539568	0.154737	0.968	7087	tags=48%, list=36%, signal=74%
GOBP_NUCLEAR_ENVELOPE_ORGANIZATION	51	0.513039	1.60724	0.0283019	0.155368	0.968	5870	tags=53%, list=30%, signal=75%
GOBP_POSITIVE_REGULATION_OF_CELLULAR_PROTEIN_LOCALIZATION	286	0.441807	1.60657	0	0.155935	0.968	6103	tags=45%, list=31%, signal=65%
GOBP_P_BODY_ASSEMBLY	19	0.657208	1.60649	0.0102249	0.155767	0.968	5758	tags=89%, list=29%, signal=126%
GOBP_LIVER_REGENERATION	31	0.539051	1.60597	0.0166976	0.156032	0.968	3818	tags=35%, list=19%, signal=44%
GOBP_NUCLEOSIDE_PHOSPHATE_BIOSYNTHETIC_PROCESS	228	0.406906	1.60597	0.0137694	0.155766	0.968	6535	tags=44%, list=33%, signal=65%
GOBP_REGULATION_OF_MEMBRANE_PERMEABILITY	82	0.455784	1.60519	0.0126582	0.156344	0.969	4635	tags=39%, list=23%, signal=51%
GOBP_3_UTR_MEDIATED_MRNA_STABILIZATION	22	0.576484	1.60518	0.0257937	0.156086	0.969	6967	tags=64%, list=35%, signal=98%
GOBP_HEMATOPOIETIC_PROGENITOR_CELL_DIFFERENTIATION	158	0.459648	1.60501	0.0147059	0.156057	0.969	6169	tags=47%, list=31%, signal=68%
GOBP_NEGATIVE_REGULATION_OF_ATPASE_ACTIVITY	17	0.572553	1.60481	0.0148699	0.155987	0.969	5130	tags=53%, list=26%, signal=71%
GOBP_EPITHELIAL_TUBE_FORMATION	125	0.458478	1.60433	0.010929	0.156253	0.969	6223	tags=45%, list=32%, signal=65%
GOBP_GLYCOSYL_COMPOUND_BIOSYNTHETIC_PROCESS	38	0.518411	1.604	0.0353817	0.156397	0.969	4757	tags=42%, list=24%, signal=55%
GOBP_NCRNA_CATABOLIC_PROCESS	32	0.533686	1.60386	0.0304762	0.156279	0.969	6206	tags=59%, list=31%, signal=86%
GOBP_RESPONSE_TO_LEUKEMIA_INHIBITORY_FACTOR	80	0.506036	1.6038	0.0128676	0.156121	0.969	3818	tags=40%, list=19%, signal=49%
GOBP_RNA_PHOSPHODIESTER_BOND_HYDROLYSIS_ENDONUCLEOLYTIC	75	0.487738	1.60273	0.0225989	0.157044	0.97	7721	tags=64%, list=39%, signal=105%
GOBP_MODULATION_BY_HOST_OF_SYMBIONT_PROCESS	59	0.474739	1.60169	0.00932836	0.157943	0.97	4186	tags=37%, list=21%, signal=47%
GOBP_NEGATIVE_REGULATION_OF_HISTONE_METHYLATION	19	0.636255	1.60148	0.01222	0.157968	0.971	2971	tags=58%, list=15%, signal=68%
GOBP_PROTEIN_AUTOUBIQUITINATION	68	0.500193	1.60085	0.0113208	0.158355	0.971	5386	tags=50%, list=27%, signal=69%
GOBP_MACROMOLECULE_DEACYLATION	106	0.474021	1.60081	0.0114723	0.158145	0.971	6493	tags=54%, list=33%, signal=80%
GOBP_FC_EPSILON_RECEPTOR_SIGNALING_PATHWAY	111	0.501756	1.60076	0.0268714	0.157924	0.971	7682	tags=68%, list=39%, signal=110%
GOBP_NEGATIVE_REGULATION_OF_PROTEIN_TYROSINE_KINASE_ACTIVITY	28	0.559398	1.60022	0.0233463	0.158273	0.971	3828	tags=46%, list=19%, signal=58%
GOBP_POSITIVE_REGULATION_OF_CHROMOSOME_SEPARATION	17	0.622348	1.5979	0.0270793	0.160609	0.971	4382	tags=65%, list=22%, signal=83%
GOBP_POSITIVE_REGULATION_OF_PROTEIN_CONTAINING_COMPLEX_ASSEMBLY	234	0.424993	1.59785	0.00366972	0.160424	0.971	6243	tags=48%, list=32%, signal=69%
GOBP_REGULATION_OF_TRANSLATION_IN_RESPONSE_TO_STRESS	21	0.638645	1.59768	0.0233918	0.160338	0.971	5825	tags=76%, list=29%, signal=108%
GOBP_GLUCOSE_METABOLIC_PROCESS	199	0.399014	1.5975	0.00517241	0.160256	0.972	7475	tags=46%, list=38%, signal=73%
GOBP_CHROMATIN_DISASSEMBLY	18	0.615653	1.59743	0.028463	0.160058	0.972	3624	tags=56%, list=18%, signal=68%
GOBP_MORPHOGENESIS_OF_EMBRYONIC_EPITHELIUM	140	0.451326	1.59716	0.0108108	0.160122	0.972	6223	tags=44%, list=32%, signal=63%
GOBP_INTERFERON_ALPHA_PRODUCTION	28	0.601574	1.59702	0.0422535	0.160004	0.972	5269	tags=64%, list=27%, signal=88%
GOBP_CELLULAR_RESPONSE_TO_ESTRADIOL_STIMULUS	35	0.503058	1.59622	0.011257	0.160665	0.972	3619	tags=34%, list=18%, signal=42%
GOBP_RRNA_TRANSCRIPTION	27	0.582908	1.59578	0.0414313	0.160881	0.972	6619	tags=78%, list=34%, signal=117%
GOBP_RRNA_METABOLIC_PROCESS	220	0.537414	1.59541	0.0703422	0.161058	0.972	4442	tags=48%, list=22%, signal=61%
GOBP_MITOCHONDRION_ORGANIZATION	493	0.435875	1.59429	0.0383912	0.162053	0.972	6513	tags=47%, list=33%, signal=69%
GOBP_HOMEOSTASIS_OF_NUMBER_OF_CELLS	238	0.4405	1.59391	0.0259259	0.162253	0.972	7462	tags=53%, list=38%, signal=84%
GOBP_REGULATION_OF_ATPASE_ACTIVITY	79	0.45259	1.59367	0.0236794	0.162235	0.972	5130	tags=39%, list=26%, signal=53%
GOBP_RNA_INTERFERENCE	16	0.667685	1.59358	0.0237154	0.162082	0.972	5480	tags=88%, list=28%, signal=121%
GOBP_POSITIVE_REGULATION_OF_PROTEIN_IMPORT	40	0.505438	1.59356	0.0167598	0.161834	0.972	6750	tags=55%, list=34%, signal=83%
GOBP_CELLULAR_PROCESS_INVOLVED_IN_REPRODUCTION_IN_MULTICELLULAR_ORGANISM	326	0.362868	1.59333	0.00821018	0.161801	0.972	4538	tags=23%, list=23%, signal=29%
GOBP_REGULATION_OF_TRANSCRIPTION_BY_RNA_POLYMERASE_I	29	0.550966	1.59314	0.0325671	0.161757	0.972	3708	tags=48%, list=19%, signal=59%
GOBP_AGING	285	0.392036	1.59212	0.010118	0.162667	0.972	7357	tags=43%, list=37%, signal=67%
GOBP_PROTEIN_K63_LINKED_DEUBIQUITINATION	31	0.588623	1.59159	0.015625	0.162951	0.972	4810	tags=61%, list=24%, signal=81%
GOBP_REGULATION_OF_NUCLEOCYTOPLASMIC_TRANSPORT	102	0.473273	1.59115	0.00746269	0.163192	0.972	6960	tags=56%, list=35%, signal=86%
GOBP_TROPHECTODERMAL_CELL_DIFFERENTIATION	16	0.587321	1.59099	0.0320151	0.163121	0.972	4407	tags=50%, list=22%, signal=64%
GOBP_ACTIVATION_OF_INNATE_IMMUNE_RESPONSE	140	0.469649	1.59094	0.0260708	0.162931	0.972	5815	tags=49%, list=29%, signal=69%
GOBP_MONOSACCHARIDE_CATABOLIC_PROCESS	59	0.482487	1.59056	0.0481481	0.163043	0.972	6604	tags=47%, list=33%, signal=71%
GOBP_POSITIVE_REGULATION_OF_PROTEOLYSIS	346	0.408102	1.59045	0.00537634	0.162885	0.972	5268	tags=37%, list=27%, signal=49%
GOBP_REGULATION_OF_PROTEIN_CATABOLIC_PROCESS	369	0.420351	1.58968	0.00357782	0.163484	0.972	7526	tags=51%, list=38%, signal=81%
GOBP_DNA_CATABOLIC_PROCESS	37	0.50793	1.58872	0.0204842	0.164249	0.973	3761	tags=41%, list=19%, signal=50%
GOBP_CYTOPLASMIC_PATTERN_RECOGNITION_RECEPTOR_SIGNALING_PATHWAY_IN_RESPONSE_TO_VIRUS	28	0.559021	1.58862	0.0210325	0.16409	0.973	6383	tags=64%, list=32%, signal=95%
GOBP_RESPONSE_TO_ANTIBIOTIC	43	0.505879	1.58811	0.00738007	0.16437	0.973	3941	tags=42%, list=20%, signal=52%
GOBP_PROTEIN_INSERTION_INTO_MEMBRANE	72	0.483386	1.5877	0.0332717	0.16451	0.973	5307	tags=47%, list=27%, signal=64%
GOBP_POSITIVE_REGULATION_OF_CELLULAR_PROTEIN_CATABOLIC_PROCESS	144	0.45388	1.58763	0.0109091	0.164342	0.973	4850	tags=41%, list=25%, signal=54%
GOBP_PROTEIN_AUTOPHOSPHORYLATION	224	0.456671	1.58725	0.00750469	0.164472	0.973	7578	tags=55%, list=38%, signal=88%
GOBP_T_CELL_RECEPTOR_SIGNALING_PATHWAY	190	0.478284	1.58698	0.0603113	0.164555	0.973	7682	tags=66%, list=39%, signal=107%
GOBP_VASCULAR_ENDOTHELIAL_CELL_PROLIFERATION	20	0.540453	1.58689	0.0276243	0.164387	0.973	5398	tags=40%, list=27%, signal=55%
GOBP_PEPTIDYL_LYSINE_DIMETHYLATION	20	0.608673	1.58557	0.0248566	0.165563	0.973	6397	tags=80%, list=32%, signal=118%
GOBP_RESPONSE_TO_VITAMIN_D	33	0.51092	1.58458	0.0380435	0.16643	0.974	4907	tags=36%, list=25%, signal=48%
GOBP_REGULATION_OF_CHROMATIN_BINDING	21	0.567473	1.58453	0.0238569	0.166213	0.974	7023	tags=81%, list=36%, signal=125%
GOBP_REGULATION_OF_HISTONE_H3_K9_METHYLATION	19	0.622004	1.58407	0.0313725	0.166527	0.975	5123	tags=74%, list=26%, signal=99%
GOBP_DNA_CATABOLIC_PROCESS_ENDONUCLEOLYTIC	28	0.531042	1.58359	0.0318352	0.166853	0.975	3411	tags=39%, list=17%, signal=47%
GOBP_PYRIMIDINE_RIBONUCLEOSIDE_TRIPHOSPHATE_METABOLIC_PROCESS	17	0.59533	1.58328	0.0319549	0.166961	0.975	2823	tags=41%, list=14%, signal=48%
GOBP_REGULATION_OF_DEFENSE_RESPONSE_TO_VIRUS	61	0.513327	1.58299	0.0351562	0.167026	0.975	6559	tags=59%, list=33%, signal=88%
GOBP_PEPTIDYL_SERINE_MODIFICATION	323	0.415768	1.5821	0.00900901	0.167811	0.975	7575	tags=51%, list=38%, signal=82%
GOBP_ATP_METABOLIC_PROCESS	280	0.42623	1.58164	0.0508167	0.1681	0.975	4937	tags=36%, list=25%, signal=47%
GOBP_PYRIMIDINE_NUCLEOTIDE_BIOSYNTHETIC_PROCESS	28	0.554947	1.58138	0.0362319	0.168109	0.975	3796	tags=43%, list=19%, signal=53%
GOBP_REGULATION_OF_RESPONSE_TO_BIOTIC_STIMULUS	395	0.441139	1.5808	0.0599251	0.168543	0.975	7758	tags=55%, list=39%, signal=89%
GOBP_MICROTUBULE_POLYMERIZATION	74	0.462685	1.58019	0.0128913	0.168952	0.975	7385	tags=59%, list=37%, signal=95%
GOBP_INTEGRATED_STRESS_RESPONSE_SIGNALING	27	0.557914	1.57962	0.0358491	0.169349	0.975	4897	tags=48%, list=25%, signal=64%
GOBP_POSITIVE_REGULATION_OF_G1_S_TRANSITION_OF_MITOTIC_CELL_CYCLE	33	0.511492	1.57926	0.0255474	0.169494	0.975	5467	tags=48%, list=28%, signal=67%
GOBP_REGULATION_OF_RIG_I_SIGNALING_PATHWAY	17	0.601292	1.57918	0.0231214	0.16932	0.975	5697	tags=65%, list=29%, signal=91%
GOBP_POSITIVE_REGULATION_OF_ESTABLISHMENT_OF_PROTEIN_LOCALIZATION	320	0.404579	1.57852	0.00359066	0.169874	0.975	6924	tags=45%, list=35%, signal=69%
GOBP_REGULATION_OF_INTRINSIC_APOPTOTIC_SIGNALING_PATHWAY_IN_RESPONSE_TO_DNA_DAMAGE_BY_P53_CLASS_MEDIATOR	16	0.557633	1.57813	0.0359848	0.170111	0.976	5013	tags=50%, list=25%, signal=67%
GOBP_VIRAL_LIFE_CYCLE	332	0.424781	1.57769	0.0215827	0.170396	0.976	6491	tags=45%, list=33%, signal=66%
GOBP_CIRCADIAN_RHYTHM	209	0.407453	1.57761	0.00700525	0.170226	0.976	4874	tags=33%, list=25%, signal=43%
GOBP_RESPONSE_TO_INTERLEUKIN_12	50	0.496544	1.57625	0.023301	0.171519	0.976	3771	tags=36%, list=19%, signal=44%
GOBP_RIG_I_SIGNALING_PATHWAY	23	0.579126	1.57606	0.034749	0.17142	0.976	6383	tags=70%, list=32%, signal=103%
GOBP_MRNA_MODIFICATION	24	0.582725	1.57572	0.0383877	0.1715	0.976	4813	tags=58%, list=24%, signal=77%
GOBP_NUCLEOSIDE_METABOLIC_PROCESS	98	0.429412	1.5752	0.0230089	0.17189	0.976	3834	tags=31%, list=19%, signal=38%
GOBP_PYRIMIDINE_NUCLEOSIDE_TRIPHOSPHATE_BIOSYNTHETIC_PROCESS	18	0.606922	1.57517	0.0385321	0.171667	0.976	2692	tags=39%, list=14%, signal=45%
GOBP_PRODUCTION_OF_SMALL_RNA_INVOLVED_IN_GENE_SILENCING_BY_RNA	51	0.533102	1.5748	0.0194932	0.17179	0.976	6370	tags=65%, list=32%, signal=95%
GOBP_ARP2_3_COMPLEX_MEDIATED_ACTIN_NUCLEATION	34	0.540765	1.57431	0.0345489	0.172105	0.976	6352	tags=68%, list=32%, signal=100%
GOBP_REGULATION_OF_RAC_PROTEIN_SIGNAL_TRANSDUCTION	18	0.591112	1.57422	0.0155642	0.171965	0.976	5225	tags=61%, list=26%, signal=83%
GOBP_POSITIVE_REGULATION_OF_ISOTYPE_SWITCHING	20	0.571114	1.57352	0.0205339	0.172529	0.976	4071	tags=50%, list=21%, signal=63%
GOBP_PHOSPHATIDYLINOSITOL_PHOSPHORYLATION	52	0.521065	1.57329	0.0317757	0.172507	0.976	5196	tags=54%, list=26%, signal=73%
GOBP_SYNAPTONEMAL_COMPLEX_ORGANIZATION	23	0.532806	1.57288	0.0444444	0.172773	0.976	5377	tags=43%, list=27%, signal=60%
GOBP_REGULATION_OF_ALCOHOL_BIOSYNTHETIC_PROCESS	70	0.471907	1.57273	0.0263653	0.172668	0.976	4818	tags=43%, list=24%, signal=56%
GOBP_MITOCHONDRIAL_RNA_PROCESSING	16	0.66628	1.57204	0.0396825	0.173263	0.976	6382	tags=94%, list=32%, signal=138%
GOBP_REGULATION_OF_INTRINSIC_APOPTOTIC_SIGNALING_PATHWAY_BY_P53_CLASS_MEDIATOR	25	0.529944	1.57169	0.0508475	0.173387	0.976	5064	tags=48%, list=26%, signal=64%
GOBP_ASYMMETRIC_CELL_DIVISION	17	0.569231	1.57151	0.0185874	0.173322	0.976	5605	tags=47%, list=28%, signal=66%
GOBP_NEGATIVE_REGULATION_OF_DEPHOSPHORYLATION	102	0.433123	1.57137	0.00182815	0.173258	0.976	5195	tags=38%, list=26%, signal=52%
GOBP_PROTEIN_CONTAINING_COMPLEX_DISASSEMBLY	314	0.422286	1.57083	0.0319149	0.173547	0.977	6569	tags=48%, list=33%, signal=71%
GOBP_REGULATION_OF_INNATE_IMMUNE_RESPONSE	299	0.454154	1.57082	0.0535373	0.173292	0.977	7682	tags=58%, list=39%, signal=93%
GOBP_REGULATION_OF_CHROMATIN_ASSEMBLY_OR_DISASSEMBLY	23	0.560759	1.5706	0.0278293	0.173294	0.977	4051	tags=52%, list=21%, signal=66%
GOBP_REGULATION_OF_VIRAL_INDUCED_CYTOPLASMIC_PATTERN_RECOGNITION_RECEPTOR_SIGNALING_PATHWAY	19	0.58743	1.56992	0.0285171	0.173837	0.977	5697	tags=63%, list=29%, signal=89%
GOBP_REGULATION_OF_OXIDOREDUCTASE_ACTIVITY	95	0.412608	1.56966	0.00869565	0.173881	0.977	5459	tags=39%, list=28%, signal=54%
GOBP_MICROTUBULE_NUCLEATION	30	0.547528	1.56933	0.036965	0.174031	0.977	4234	tags=50%, list=21%, signal=64%
GOBP_DEOXYRIBONUCLEOSIDE_MONOPHOSPHATE_METABOLIC_PROCESS	16	0.578698	1.56868	0.0481696	0.17463	0.977	3762	tags=38%, list=19%, signal=46%
GOBP_NONRIBOSOMAL_PEPTIDE_BIOSYNTHETIC_PROCESS	18	0.563991	1.56843	0.0449438	0.174624	0.977	2948	tags=33%, list=15%, signal=39%
GOBP_REGULATION_OF_DNA_BINDING	113	0.415914	1.56801	0.0265957	0.174861	0.978	7653	tags=50%, list=39%, signal=80%
GOBP_REGULATION_OF_MITOCHONDRIAL_GENE_EXPRESSION	27	0.608553	1.56795	0.0563107	0.174676	0.978	5244	tags=67%, list=27%, signal=91%
GOBP_NUCLEOTIDE_TRANSMEMBRANE_TRANSPORT	16	0.579274	1.56745	0.0359848	0.174992	0.978	5662	tags=63%, list=29%, signal=88%
GOBP_NCRNA_3_END_PROCESSING	46	0.531702	1.56701	0.0589431	0.175216	0.978	6382	tags=46%, list=32%, signal=67%
GOBP_PRIMARY_NEURAL_TUBE_FORMATION	88	0.477182	1.5665	0.0242991	0.175512	0.978	6160	tags=48%, list=31%, signal=69%
GOBP_STRESS_GRANULE_ASSEMBLY	23	0.611848	1.56591	0.042065	0.175978	0.978	4279	tags=65%, list=22%, signal=83%
GOBP_NEGATIVE_REGULATION_OF_TRANSFERASE_ACTIVITY	271	0.411065	1.56442	0.00738007	0.177351	0.978	7514	tags=50%, list=38%, signal=79%
GOBP_CELL_DEATH_IN_RESPONSE_TO_OXIDATIVE_STRESS	76	0.448689	1.5643	0.0215054	0.177245	0.979	6322	tags=46%, list=32%, signal=67%
GOBP_MATURATION_OF_SSU_RRNA_FROM_TRICISTRONIC_RRNA_TRANSCRIPT_SSU_RRNA_5_8S_RRNA_LSU_RRNA	34	0.616313	1.56291	0.0539499	0.178533	0.979	4187	tags=53%, list=21%, signal=67%
GOBP_ANTIGEN_RECEPTOR_MEDIATED_SIGNALING_PATHWAY	235	0.463771	1.56289	0.0773694	0.178301	0.979	7682	tags=64%, list=39%, signal=103%
GOBP_MITOCHONDRIAL_CALCIUM_ION_TRANSMEMBRANE_TRANSPORT	23	0.576055	1.56281	0.0354478	0.178128	0.979	4431	tags=52%, list=22%, signal=67%
GOBP_RHYTHMIC_PROCESS	290	0.402315	1.56276	0.00722022	0.177914	0.979	5118	tags=32%, list=26%, signal=43%
GOBP_REGULATION_OF_INTRACELLULAR_PROTEIN_TRANSPORT	239	0.426735	1.56271	0.00927644	0.177733	0.979	7142	tags=51%, list=36%, signal=79%
GOBP_NEGATIVE_REGULATION_OF_DNA_BIOSYNTHETIC_PROCESS	35	0.525768	1.56228	0.0213592	0.17799	0.979	3941	tags=40%, list=20%, signal=50%
GOBP_CYTOSKELETON_DEPENDENT_INTRACELLULAR_TRANSPORT	186	0.455273	1.56222	0.0301887	0.177808	0.979	7501	tags=60%, list=38%, signal=96%
GOBP_TOR_SIGNALING	109	0.446108	1.56205	0.0183486	0.17777	0.98	7126	tags=56%, list=36%, signal=87%
GOBP_MITOCHONDRIAL_FISSION	38	0.531055	1.56059	0.0281955	0.179186	0.98	6169	tags=53%, list=31%, signal=76%
GOBP_MAINTENANCE_OF_CELL_NUMBER	146	0.444623	1.56044	0.0186567	0.179093	0.98	5331	tags=40%, list=27%, signal=54%
GOBP_RESPONSE_TO_TESTOSTERONE	41	0.45373	1.56022	0.0132576	0.179087	0.98	3411	tags=32%, list=17%, signal=38%
GOBP_NEGATIVE_REGULATION_OF_CELLULAR_SENESCENCE	18	0.585589	1.55988	0.0319549	0.179215	0.98	4392	tags=50%, list=22%, signal=64%
GOBP_HEPATICOBILIARY_SYSTEM_DEVELOPMENT	140	0.409441	1.55965	0.0070922	0.179254	0.981	5469	tags=36%, list=28%, signal=49%
GOBP_MATURATION_OF_LSU_RRNA_FROM_TRICISTRONIC_RRNA_TRANSCRIPT_SSU_RRNA_5_8S_RRNA_LSU_RRNA	15	0.676284	1.55944	0.0605469	0.179256	0.981	3121	tags=67%, list=16%, signal=79%
GOBP_POSITIVE_REGULATION_OF_CELL_CYCLE_G1_S_PHASE_TRANSITION	44	0.470128	1.55934	0.0211268	0.179126	0.981	5511	tags=43%, list=28%, signal=60%
GOBP_NEGATIVE_REGULATION_OF_PEPTIDYL_LYSINE_ACETYLATION	19	0.54329	1.55932	0.0328185	0.178897	0.981	6023	tags=58%, list=30%, signal=83%
GOBP_REGULATION_OF_APOPTOTIC_SIGNALING_PATHWAY	327	0.399039	1.55878	0.00702988	0.179265	0.982	7393	tags=47%, list=37%, signal=74%
GOBP_IMMUNOGLOBULIN_PRODUCTION	96	0.478476	1.55836	0.0581395	0.179531	0.982	7482	tags=57%, list=38%, signal=92%
GOBP_REGULATION_OF_PROTEIN_DEPHOSPHORYLATION	137	0.430612	1.55735	0.00927644	0.180541	0.983	5130	tags=39%, list=26%, signal=53%
GOBP_CEREBRAL_CORTEX_DEVELOPMENT	101	0.445524	1.55626	0.0127042	0.181446	0.983	8576	tags=60%, list=43%, signal=106%
GOBP_RNA_DESTABILIZATION	35	0.566185	1.55374	0.0325866	0.184197	0.983	5243	tags=57%, list=27%, signal=78%
GOBP_REGULATION_OF_BINDING	340	0.393616	1.55325	0.00891266	0.184515	0.983	8300	tags=54%, list=42%, signal=91%
GOBP_INTRACILIARY_TRANSPORT_INVOLVED_IN_CILIUM_ASSEMBLY	37	0.557228	1.5529	0.0485437	0.184682	0.983	7265	tags=81%, list=37%, signal=128%
GOBP_RESPONSE_TO_NITRIC_OXIDE	18	0.556074	1.5522	0.0436433	0.18534	0.984	6533	tags=67%, list=33%, signal=100%
GOBP_IMMUNE_RESPONSE_REGULATING_SIGNALING_PATHWAY	389	0.448828	1.5516	0.0726577	0.185766	0.984	7682	tags=59%, list=39%, signal=95%
GOBP_REGULATION_OF_PROTEIN_EXPORT_FROM_NUCLEUS	32	0.50415	1.5515	0.0325048	0.185585	0.984	7125	tags=63%, list=36%, signal=98%
GOBP_RIBOSE_PHOSPHATE_BIOSYNTHETIC_PROCESS	164	0.416592	1.55077	0.026643	0.186226	0.984	6523	tags=46%, list=33%, signal=69%
GOBP_ANIMAL_ORGAN_REGENERATION	73	0.455014	1.55016	0.0284192	0.186729	0.984	3834	tags=30%, list=19%, signal=37%
GOBP_REGULATION_OF_REPRODUCTIVE_PROCESS	149	0.37788	1.55005	0.0306452	0.186622	0.984	1847	tags=14%, list=9%, signal=15%
GOBP_RESPONSE_TO_OXIDATIVE_STRESS	416	0.380579	1.54979	0.00863558	0.186702	0.984	6794	tags=42%, list=34%, signal=63%
GOBP_NEGATIVE_REGULATION_OF_APOPTOTIC_SIGNALING_PATHWAY	213	0.408293	1.54955	0.00888099	0.186761	0.984	7393	tags=48%, list=37%, signal=76%
GOBP_REGULATION_OF_HEMATOPOIETIC_STEM_CELL_DIFFERENTIATION	74	0.505941	1.54869	0.070632	0.187566	0.984	5815	tags=51%, list=29%, signal=73%
GOBP_POSITIVE_REGULATION_OF_ORGANELLE_ASSEMBLY	61	0.527696	1.54841	0.0219561	0.187622	0.985	7549	tags=70%, list=38%, signal=114%
GOBP_NUCLEOTIDE_EXCISION_REPAIR_DNA_DUPLEX_UNWINDING	22	0.577705	1.54838	0.0564972	0.187395	0.985	4619	tags=50%, list=23%, signal=65%
GOBP_MONOSACCHARIDE_METABOLIC_PROCESS	259	0.381706	1.54771	0.0101868	0.187907	0.985	7475	tags=43%, list=38%, signal=69%
GOBP_INTERFERON_BETA_PRODUCTION	49	0.536197	1.54726	0.0240481	0.18817	0.985	6559	tags=61%, list=33%, signal=91%
GOBP_NADH_METABOLIC_PROCESS	41	0.511121	1.54658	0.0654206	0.188755	0.985	7320	tags=59%, list=37%, signal=93%
GOBP_NEGATIVE_REGULATION_OF_PROTEIN_MODIFICATION_BY_SMALL_PROTEIN_CONJUGATION_OR_REMOVAL	83	0.436304	1.54645	0.0151229	0.188666	0.985	7957	tags=59%, list=40%, signal=98%
GOBP_REGULATION_OF_MEGAKARYOCYTE_DIFFERENTIATION	54	0.472495	1.5464	0.028463	0.188472	0.985	5561	tags=50%, list=28%, signal=69%
GOBP_DETERMINATION_OF_ADULT_LIFESPAN	17	0.573612	1.54609	0.0321361	0.188626	0.985	5469	tags=53%, list=28%, signal=73%
GOBP_ESTABLISHMENT_OF_SPINDLE_ORIENTATION	34	0.553663	1.54521	0.0322581	0.189475	0.985	6321	tags=62%, list=32%, signal=91%
GOBP_TUBE_FORMATION	139	0.439397	1.54515	0.0237226	0.189295	0.985	6223	tags=43%, list=32%, signal=63%
GOBP_ACTIVATION_OF_IMMUNE_RESPONSE	437	0.429504	1.54476	0.0743494	0.189537	0.985	7682	tags=55%, list=39%, signal=88%
GOBP_NEGATIVE_REGULATION_OF_PROTEIN_DEPHOSPHORYLATION	61	0.438586	1.54475	0.0127042	0.189281	0.985	5002	tags=39%, list=25%, signal=53%
GOBP_MEGAKARYOCYTE_DIFFERENTIATION	70	0.475083	1.54393	0.0172745	0.190054	0.986	5561	tags=50%, list=28%, signal=69%
GOBP_REGULATION_OF_MONOOXYGENASE_ACTIVITY	57	0.445578	1.54287	0.0304114	0.191008	0.986	5459	tags=44%, list=28%, signal=60%
GOBP_MATURATION_OF_LSU_RRNA	27	0.636221	1.54252	0.0758755	0.191184	0.986	5173	tags=74%, list=26%, signal=100%
GOBP_POSITIVE_REGULATION_OF_PROTEIN_EXPORT_FROM_NUCLEUS	20	0.548343	1.54204	0.0346821	0.191539	0.986	3941	tags=50%, list=20%, signal=62%
GOBP_GLUCOSE_6_PHOSPHATE_METABOLIC_PROCESS	24	0.529958	1.54136	0.0634921	0.192102	0.986	4618	tags=42%, list=23%, signal=54%
GOBP_RELEASE_OF_CYTOCHROME_C_FROM_MITOCHONDRIA	53	0.466137	1.5403	0.0569853	0.193188	0.986	4635	tags=40%, list=23%, signal=52%
GOBP_REGULATION_OF_INTRACELLULAR_TRANSPORT	332	0.417578	1.53964	0.0201835	0.193767	0.986	7143	tags=50%, list=36%, signal=77%
GOBP_RNA_CAPPING	32	0.541154	1.53942	0.0489642	0.193784	0.986	3455	tags=44%, list=17%, signal=53%
GOBP_FATTY_ACID_HOMEOSTASIS	16	0.564952	1.53929	0.0305927	0.193724	0.987	5479	tags=50%, list=28%, signal=69%
GOBP_BETA_CATENIN_TCF_COMPLEX_ASSEMBLY	31	0.57378	1.53929	0.0396825	0.193463	0.987	4034	tags=58%, list=20%, signal=73%
GOBP_PLACENTA_DEVELOPMENT	132	0.407978	1.53865	0.0243056	0.194055	0.987	5398	tags=38%, list=27%, signal=52%
GOBP_POSITIVE_REGULATION_OF_NITRIC_OXIDE_SYNTHASE_ACTIVITY	23	0.534105	1.5371	0.0415162	0.195795	0.987	5459	tags=57%, list=28%, signal=78%
GOBP_HEMATOPOIETIC_STEM_CELL_DIFFERENTIATION	88	0.481438	1.53707	0.0599251	0.195566	0.987	6113	tags=49%, list=31%, signal=70%
GOBP_NEGATIVE_REGULATION_OF_GENE_SILENCING	24	0.54142	1.53647	0.0215686	0.196088	0.987	3941	tags=42%, list=20%, signal=52%
GOBP_POSITIVE_REGULATION_OF_CATABOLIC_PROCESS	436	0.412175	1.53642	0.0238095	0.195886	0.987	5268	tags=39%, list=27%, signal=51%
GOBP_PROTEIN_DEMETHYLATION	31	0.582116	1.5363	0.0402414	0.195784	0.987	5182	tags=68%, list=26%, signal=92%
GOBP_CELLULAR_RESPONSE_TO_FATTY_ACID	37	0.463755	1.536	0.060219	0.195952	0.987	3577	tags=27%, list=18%, signal=33%
GOBP_CELLULAR_RESPONSE_TO_REACTIVE_OXYGEN_SPECIES	144	0.416835	1.53426	0.0146789	0.197914	0.987	6017	tags=42%, list=30%, signal=60%
GOBP_PTERIDINE_CONTAINING_COMPOUND_METABOLIC_PROCESS	31	0.500843	1.53425	0.0492701	0.197656	0.987	5311	tags=52%, list=27%, signal=70%
GOBP_ERYTHROCYTE_DEVELOPMENT	30	0.505635	1.53423	0.0237154	0.197411	0.987	6102	tags=53%, list=31%, signal=77%
GOBP_RESPONSE_TO_IRON_ION	28	0.487269	1.53381	0.0382514	0.197709	0.987	5573	tags=39%, list=28%, signal=55%
GOBP_NEGATIVE_REGULATION_OF_HISTONE_ACETYLATION	16	0.555454	1.53307	0.0449219	0.198379	0.987	6023	tags=63%, list=30%, signal=90%
GOBP_NUCLEAR_TRANSCRIBED_MRNA_CATABOLIC_PROCESS_EXONUCLEOLYTIC	35	0.541994	1.5327	0.0726577	0.198582	0.987	8231	tags=80%, list=42%, signal=137%
GOBP_NEGATIVE_REGULATION_OF_INTRINSIC_APOPTOTIC_SIGNALING_PATHWAY	89	0.433781	1.53154	0.0412926	0.199814	0.989	5013	tags=37%, list=25%, signal=49%
GOBP_REGULATION_OF_T_CELL_CHEMOTAXIS	16	0.576959	1.53145	0.0658915	0.199662	0.989	6682	tags=69%, list=34%, signal=104%
GOBP_REGULATION_OF_STEROID_BIOSYNTHETIC_PROCESS	85	0.433126	1.53074	0.0440367	0.200326	0.989	4818	tags=36%, list=24%, signal=48%
GOBP_CYTOPLASMIC_TRANSLATIONAL_INITIATION	33	0.585488	1.53033	0.0831793	0.20064	0.989	4183	tags=61%, list=21%, signal=77%
GOBP_NEGATIVE_REGULATION_OF_ORGANELLE_ASSEMBLY	40	0.492051	1.53029	0.0333952	0.200405	0.989	5331	tags=45%, list=27%, signal=62%
GOBP_POSITIVE_REGULATION_OF_PROTEASOMAL_UBIQUITIN_DEPENDENT_PROTEIN_CATABOLIC_PROCESS	83	0.464402	1.5295	0.0294118	0.201104	0.989	4238	tags=39%, list=21%, signal=49%
GOBP_MACROAUTOPHAGY	296	0.438569	1.5291	0.0644007	0.201392	0.989	7338	tags=55%, list=37%, signal=86%
GOBP_REGULATION_OF_DEPHOSPHORYLATION	201	0.417354	1.52835	0.00744879	0.202038	0.989	5195	tags=37%, list=26%, signal=50%
GOBP_RNA_SURVEILLANCE	15	0.61201	1.5283	0.0697211	0.201831	0.989	5470	tags=67%, list=28%, signal=92%
GOBP_RAS_PROTEIN_SIGNAL_TRANSDUCTION	326	0.433791	1.52776	0.0451128	0.202274	0.989	6000	tags=46%, list=30%, signal=65%
GOBP_PALLIUM_DEVELOPMENT	149	0.399561	1.52774	0.0226481	0.202022	0.989	7649	tags=46%, list=39%, signal=75%
GOBP_POSITIVE_REGULATION_OF_PROTEIN_TARGETING_TO_MITOCHONDRION	32	0.514787	1.52762	0.0305927	0.201911	0.989	7118	tags=59%, list=36%, signal=93%
GOBP_REGULATION_OF_MICROTUBULE_POLYMERIZATION_OR_DEPOLYMERIZATION	77	0.440472	1.52755	0.0291971	0.20173	0.989	7385	tags=55%, list=37%, signal=87%
GOBP_PYRIMIDINE_NUCLEOSIDE_MONOPHOSPHATE_METABOLIC_PROCESS	18	0.53558	1.52753	0.0402299	0.201488	0.989	3796	tags=39%, list=19%, signal=48%
GOBP_NUCLEOTIDE_EXCISION_REPAIR_DNA_DAMAGE_RECOGNITION	23	0.587316	1.52712	0.0602637	0.201788	0.989	4714	tags=52%, list=24%, signal=68%
GOBP_PATTERN_RECOGNITION_RECEPTOR_SIGNALING_PATHWAY	194	0.445822	1.52711	0.0509434	0.201541	0.989	7524	tags=55%, list=38%, signal=87%
GOBP_PIGMENT_BIOSYNTHETIC_PROCESS	56	0.46112	1.52645	0.0404218	0.202116	0.989	5153	tags=39%, list=26%, signal=53%
GOBP_REGULATION_OF_CHOLESTEROL_BIOSYNTHETIC_PROCESS	43	0.538485	1.52604	0.0718447	0.202415	0.989	5187	tags=53%, list=26%, signal=72%
GOBP_NEGATIVE_REGULATION_OF_KINASE_ACTIVITY	243	0.407053	1.52588	0.012963	0.202388	0.989	6823	tags=45%, list=35%, signal=68%
GOBP_MICROTUBULE_BASED_MOVEMENT	342	0.407529	1.52526	0.0638686	0.202943	0.989	6402	tags=39%, list=32%, signal=56%
GOBP_NEGATIVE_REGULATION_OF_INTRINSIC_APOPTOTIC_SIGNALING_PATHWAY_BY_P53_CLASS_MEDIATOR	18	0.540002	1.52521	0.0540541	0.202745	0.989	5013	tags=50%, list=25%, signal=67%
GOBP_REGULATION_OF_LAMELLIPODIUM_ASSEMBLY	38	0.524832	1.52498	0.0444444	0.202765	0.989	6136	tags=58%, list=31%, signal=84%
GOBP_NEGATIVE_REGULATION_OF_PHOSPHORUS_METABOLIC_PROCESS	476	0.392968	1.52439	0.00915751	0.203215	0.989	7533	tags=47%, list=38%, signal=75%
GOBP_GLYCOLYTIC_PROCESS_THROUGH_FRUCTOSE_6_PHOSPHATE	29	0.552257	1.52412	0.0796117	0.203298	0.989	6482	tags=59%, list=33%, signal=87%
GOBP_GLOBAL_GENOME_NUCLEOTIDE_EXCISION_REPAIR	26	0.553859	1.52375	0.0609524	0.203544	0.989	4672	tags=50%, list=24%, signal=65%
GOBP_PYRIMIDINE_NUCLEOSIDE_TRIPHOSPHATE_METABOLIC_PROCESS	23	0.555651	1.52313	0.0421245	0.204013	0.989	6488	tags=61%, list=33%, signal=91%
GOBP_CYTOKINETIC_PROCESS	38	0.523256	1.52308	0.0579439	0.20382	0.989	3742	tags=42%, list=19%, signal=52%
GOBP_MITOCHONDRIAL_CALCIUM_ION_HOMEOSTASIS	24	0.50879	1.52288	0.0510018	0.203821	0.989	4431	tags=42%, list=22%, signal=54%
GOBP_CELLULAR_RESPONSE_TO_VIRUS	57	0.489542	1.52233	0.0451866	0.204234	0.989	6906	tags=58%, list=35%, signal=89%
GOBP_REGULATION_OF_PROTEIN_CONTAINING_COMPLEX_ASSEMBLY	413	0.391147	1.52211	0.0161871	0.204255	0.989	7714	tags=52%, list=39%, signal=83%
GOBP_SINGLE_STRANDED_VIRAL_RNA_REPLICATION_VIA_DOUBLE_STRANDED_DNA_INTERMEDIATE	18	0.561563	1.5214	0.0673077	0.204917	0.989	4229	tags=39%, list=21%, signal=49%
GOBP_EMBRYONIC_PLACENTA_DEVELOPMENT	78	0.44453	1.5212	0.0357143	0.204925	0.989	5398	tags=42%, list=27%, signal=58%
GOBP_FOLIC_ACID_METABOLIC_PROCESS	18	0.552635	1.52106	0.0440367	0.204848	0.989	2521	tags=39%, list=13%, signal=45%
GOBP_RESPONSE_TO_INTERLEUKIN_7	26	0.530344	1.51915	0.0515267	0.206961	0.989	5052	tags=42%, list=26%, signal=57%
GOBP_DNA_DEMETHYLATION	27	0.509759	1.5176	0.0509434	0.208791	0.989	5094	tags=44%, list=26%, signal=60%
GOBP_NUCLEOTIDE_TRANSPORT	32	0.471612	1.51741	0.0309654	0.208786	0.989	5662	tags=47%, list=29%, signal=66%
GOBP_INTRACELLULAR_RECEPTOR_SIGNALING_PATHWAY	262	0.419683	1.51723	0.0148976	0.208723	0.989	6672	tags=45%, list=34%, signal=67%
GOBP_REGULATION_OF_PROTEIN_TARGETING_TO_MITOCHONDRION	42	0.484274	1.51638	0.0348162	0.209507	0.989	7118	tags=55%, list=36%, signal=85%
GOBP_NUCLEOTIDE_BINDING_DOMAIN_LEUCINE_RICH_REPEAT_CONTAINING_RECEPTOR_SIGNALING_PATHWAY	39	0.514935	1.51629	0.0410156	0.209349	0.989	7433	tags=64%, list=38%, signal=103%
GOBP_GERM_CELL_DEVELOPMENT	234	0.344901	1.51595	0.0191083	0.209577	0.989	6399	tags=29%, list=32%, signal=42%
GOBP_SMALL_GTPASE_MEDIATED_SIGNAL_TRANSDUCTION	487	0.425834	1.51568	0.0415879	0.209658	0.989	6193	tags=46%, list=31%, signal=65%
GOBP_ESTABLISHMENT_OR_MAINTENANCE_OF_CELL_POLARITY	205	0.434832	1.51549	0.0349265	0.20962	0.989	6647	tags=49%, list=34%, signal=73%
GOBP_NAD_METABOLIC_PROCESS	49	0.480785	1.51495	0.0763501	0.210033	0.989	6482	tags=51%, list=33%, signal=76%
GOBP_REGULATION_OF_EMBRYONIC_DEVELOPMENT	56	0.466116	1.51494	0.0558659	0.20979	0.989	5082	tags=39%, list=26%, signal=53%
GOBP_CELLULAR_MODIFIED_AMINO_ACID_BIOSYNTHETIC_PROCESS	45	0.470549	1.51477	0.057971	0.209757	0.989	4749	tags=36%, list=24%, signal=47%
GOBP_REGULATION_OF_STEM_CELL_POPULATION_MAINTENANCE	30	0.509047	1.51411	0.0482375	0.210332	0.989	4407	tags=40%, list=22%, signal=51%
GOBP_REGULATION_OF_MAMMARY_GLAND_EPITHELIAL_CELL_PROLIFERATION	16	0.537785	1.51346	0.0580524	0.210917	0.989	2075	tags=25%, list=11%, signal=28%
GOBP_FIBROBLAST_PROLIFERATION	77	0.43397	1.51297	0.0356506	0.211305	0.989	5469	tags=38%, list=28%, signal=52%
GOBP_ANTIGEN_PROCESSING_AND_PRESENTATION_OF_PEPTIDE_OR_POLYSACCHARIDE_ANTIGEN_VIA_MHC_CLASS_II	100	0.472624	1.51288	0.0522388	0.211152	0.989	7888	tags=66%, list=40%, signal=109%
GOBP_REGULATION_OF_AUTOPHAGY	318	0.423234	1.51255	0.0436364	0.211296	0.989	7335	tags=53%, list=37%, signal=84%
GOBP_VIRAL_GENOME_REPLICATION	120	0.455095	1.51243	0.0531309	0.211181	0.989	9158	tags=68%, list=46%, signal=127%
GOBP_PROTEIN_TARGETING_TO_MITOCHONDRION	96	0.473578	1.51168	0.0715631	0.211917	0.989	7118	tags=56%, list=36%, signal=88%
GOBP_PURINE_NUCLEOSIDE_BIOSYNTHETIC_PROCESS	20	0.53345	1.51104	0.0798479	0.212451	0.989	5440	tags=45%, list=28%, signal=62%
GOBP_ALCOHOL_BIOSYNTHETIC_PROCESS	148	0.404508	1.51052	0.0392857	0.212868	0.989	6709	tags=45%, list=34%, signal=68%
GOBP_TRANSPORT_ALONG_MICROTUBULE	147	0.448766	1.51041	0.0616822	0.212729	0.989	7501	tags=60%, list=38%, signal=96%
GOBP_PROTEIN_STABILIZATION	178	0.416425	1.50993	0.0346084	0.213139	0.989	5314	tags=39%, list=27%, signal=53%
GOBP_REGULATION_OF_OXIDATIVE_STRESS_INDUCED_CELL_DEATH	56	0.43984	1.50967	0.0338681	0.213218	0.989	5188	tags=39%, list=26%, signal=53%
GOBP_POSITIVE_REGULATION_OF_PROTEIN_CATABOLIC_PROCESS	217	0.413894	1.50959	0.0273723	0.213058	0.989	5268	tags=39%, list=27%, signal=53%
GOBP_RAC_PROTEIN_SIGNAL_TRANSDUCTION	37	0.522679	1.50931	0.0442308	0.213186	0.989	5864	tags=59%, list=30%, signal=84%
GOBP_GENETIC_IMPRINTING	24	0.506523	1.50878	0.0469043	0.213654	0.989	7118	tags=63%, list=36%, signal=98%
GOBP_DNA_METHYLATION_DEPENDENT_HETEROCHROMATIN_ASSEMBLY	18	0.575267	1.5087	0.0533088	0.213517	0.989	4051	tags=56%, list=21%, signal=70%
GOBP_PROTEIN_COMPLEX_OLIGOMERIZATION	225	0.377287	1.50826	0.0105079	0.213839	0.99	6952	tags=38%, list=35%, signal=58%
GOBP_CELLULAR_PROTEIN_COMPLEX_DISASSEMBLY	212	0.422736	1.50688	0.0683453	0.215408	0.99	6569	tags=47%, list=33%, signal=70%
GOBP_HISTONE_H3_K27_METHYLATION	15	0.601611	1.50604	0.0526316	0.216205	0.99	4874	tags=60%, list=25%, signal=80%
GOBP_CELLULAR_RESPONSE_TO_ALKALOID	32	0.480439	1.50579	0.0646853	0.216277	0.99	2945	tags=22%, list=15%, signal=26%
GOBP_POSITIVE_REGULATION_OF_NEURON_DEATH	89	0.429703	1.50561	0.0408163	0.216198	0.99	5736	tags=44%, list=29%, signal=61%
GOBP_CILIUM_ORGANIZATION	368	0.431659	1.50559	0.0642722	0.215966	0.99	6402	tags=45%, list=32%, signal=66%
GOBP_PROTEIN_DEPHOSPHORYLATION	311	0.40553	1.50548	0.0222222	0.215825	0.99	7533	tags=50%, list=38%, signal=80%
GOBP_REGULATION_OF_PROTEIN_SERINE_THREONINE_KINASE_ACTIVITY	468	0.385881	1.50513	0.0375	0.21602	0.99	7541	tags=46%, list=38%, signal=73%
GOBP_ESTABLISHMENT_OF_MITOTIC_SPINDLE_ORIENTATION	28	0.553529	1.50416	0.0485075	0.216974	0.991	2126	tags=36%, list=11%, signal=40%
GOBP_REGULATION_OF_STEM_CELL_PROLIFERATION	37	0.470037	1.50406	0.047259	0.21682	0.991	6011	tags=43%, list=30%, signal=62%
GOBP_PURINE_CONTAINING_COMPOUND_TRANSMEMBRANE_TRANSPORT	17	0.526517	1.5032	0.051756	0.217694	0.991	5662	tags=47%, list=29%, signal=66%
GOBP_HISTONE_H4_K5_ACETYLATION	16	0.611872	1.50286	0.046	0.21788	0.991	4874	tags=63%, list=25%, signal=83%
GOBP_RNA_5_END_PROCESSING	22	0.601183	1.50286	0.0603113	0.217624	0.991	2234	tags=41%, list=11%, signal=46%
GOBP_DEPHOSPHORYLATION	450	0.393389	1.50232	0.0183486	0.218088	0.991	7533	tags=48%, list=38%, signal=76%
GOBP_PROTEIN_TETRAMERIZATION	83	0.39846	1.50211	0.0228873	0.218069	0.991	5063	tags=30%, list=26%, signal=40%
GOBP_PURINE_CONTAINING_COMPOUND_BIOSYNTHETIC_PROCESS	175	0.389295	1.50208	0.0243902	0.217837	0.991	5084	tags=35%, list=26%, signal=47%
GOBP_GOLGI_ORGANIZATION	143	0.476882	1.50135	0.0625	0.218435	0.991	7760	tags=58%, list=39%, signal=95%
GOBP_T_CELL_CHEMOTAXIS	27	0.525382	1.50126	0.100189	0.218325	0.991	8151	tags=70%, list=41%, signal=120%
GOBP_FIBROBLAST_APOPTOTIC_PROCESS	20	0.571572	1.50001	0.046875	0.219623	0.991	4704	tags=60%, list=24%, signal=79%
GOBP_REGULATION_OF_CHOLESTEROL_METABOLIC_PROCESS	56	0.481295	1.49995	0.076779	0.219436	0.991	5187	tags=46%, list=26%, signal=63%
GOBP_NUCLEOSIDE_TRIPHOSPHATE_METABOLIC_PROCESS	83	0.42288	1.49995	0.0448833	0.219185	0.991	6488	tags=47%, list=33%, signal=70%
GOBP_ORGANELLE_INHERITANCE	15	0.577464	1.49983	0.0454545	0.21909	0.991	2688	tags=40%, list=14%, signal=46%
GOBP_DNA_DEALKYLATION	33	0.485671	1.49979	0.0493359	0.218894	0.991	5094	tags=42%, list=26%, signal=57%
GOBP_CELLULAR_RESPONSE_TO_ALCOHOL	86	0.437229	1.4992	0.0447227	0.219426	0.991	6023	tags=43%, list=30%, signal=62%
GOBP_MAINTENANCE_OF_PROTEIN_LOCATION_IN_NUCLEUS	23	0.483862	1.49836	0.0307971	0.220183	0.991	7539	tags=57%, list=38%, signal=91%
GOBP_REGULATION_OF_INSULIN_RECEPTOR_SIGNALING_PATHWAY	65	0.454566	1.49801	0.0247148	0.220352	0.991	5604	tags=43%, list=28%, signal=60%
GOBP_NEGATIVE_REGULATION_OF_BINDING	149	0.383568	1.49795	0.0210896	0.22017	0.991	7711	tags=48%, list=39%, signal=79%
GOBP_TELENCEPHALON_DEVELOPMENT	223	0.384666	1.49689	0.0276817	0.22129	0.991	7649	tags=44%, list=39%, signal=72%
GOBP_PROTEIN_REFOLDING	22	0.567477	1.49684	0.094	0.221076	0.991	4882	tags=45%, list=25%, signal=60%
GOBP_REGULATION_OF_MACROAUTOPHAGY	156	0.446529	1.49631	0.0701439	0.221517	0.991	7636	tags=58%, list=39%, signal=93%
GOBP_ENDOPLASMIC_RETICULUM_ORGANIZATION	77	0.457375	1.49586	0.0755396	0.221851	0.991	7303	tags=56%, list=37%, signal=88%
GOBP_TOLL_LIKE_RECEPTOR_9_SIGNALING_PATHWAY	26	0.544239	1.49527	0.0679612	0.222399	0.991	7149	tags=73%, list=36%, signal=114%
GOBP_IRON_SULFUR_CLUSTER_ASSEMBLY	21	0.609724	1.49467	0.0894632	0.222887	0.991	4347	tags=52%, list=22%, signal=67%
GOBP_REGULATION_OF_DNA_DAMAGE_RESPONSE_SIGNAL_TRANSDUCTION_BY_P53_CLASS_MEDIATOR	31	0.474452	1.49455	0.0500928	0.222781	0.991	6284	tags=52%, list=32%, signal=76%
GOBP_RESPONSE_TO_ALKALOID	99	0.383205	1.49411	0.031405	0.223088	0.991	2945	tags=21%, list=15%, signal=25%
GOBP_PYRIMIDINE_CONTAINING_COMPOUND_CATABOLIC_PROCESS	39	0.440922	1.49329	0.037234	0.223949	0.991	4229	tags=28%, list=21%, signal=36%
GOBP_HIPPOCAMPUS_DEVELOPMENT	72	0.397864	1.49326	0.0367279	0.223719	0.991	7572	tags=42%, list=38%, signal=67%
GOBP_MIDBRAIN_DEVELOPMENT	82	0.408548	1.49309	0.0402098	0.223674	0.991	5642	tags=38%, list=29%, signal=53%
GOBP_TRNA_THREONYLCARBAMOYLADENOSINE_METABOLIC_PROCESS	16	0.600496	1.49212	0.0947776	0.224693	0.991	5794	tags=56%, list=29%, signal=80%
GOBP_NEGATIVE_REGULATION_OF_INTRINSIC_APOPTOTIC_SIGNALING_PATHWAY_IN_RESPONSE_TO_DNA_DAMAGE	29	0.47689	1.49194	0.0601093	0.224659	0.991	5013	tags=41%, list=25%, signal=55%
GOBP_INNATE_IMMUNE_RESPONSE_ACTIVATING_SIGNAL_TRANSDUCTION	115	0.445179	1.49194	0.0791897	0.224396	0.991	8649	tags=64%, list=44%, signal=114%
GOBP_REGULATION_OF_PHOSPHATASE_ACTIVITY	167	0.40393	1.4914	0.0217391	0.224881	0.991	3917	tags=31%, list=20%, signal=38%
GOBP_NEGATIVE_REGULATION_OF_SIGNAL_TRANSDUCTION_BY_P53_CLASS_MEDIATOR	26	0.497627	1.4908	0.0662879	0.225431	0.991	5013	tags=46%, list=25%, signal=62%
GOBP_REGULATION_OF_TOR_SIGNALING	88	0.441672	1.49027	0.0392523	0.225862	0.991	7126	tags=56%, list=36%, signal=87%
GOBP_ORGANELLE_FUSION	136	0.416156	1.48864	0.0487365	0.227779	0.991	6456	tags=47%, list=33%, signal=69%
GOBP_POSITIVE_REGULATION_OF_DENDRITE_DEVELOPMENT	15	0.560754	1.48782	0.0300752	0.228614	0.991	3686	tags=33%, list=19%, signal=41%
GOBP_STEM_CELL_DIFFERENTIATION	246	0.386881	1.48758	0.0314136	0.228717	0.991	6248	tags=37%, list=32%, signal=53%
GOBP_NLS_BEARING_PROTEIN_IMPORT_INTO_NUCLEUS	20	0.586985	1.48657	0.0838207	0.229958	0.991	2332	tags=40%, list=12%, signal=45%
GOBP_REGULATION_OF_FILOPODIUM_ASSEMBLY	43	0.476676	1.48594	0.0408922	0.230441	0.991	5458	tags=47%, list=28%, signal=64%
GOBP_REGULATION_OF_ARP2_3_COMPLEX_MEDIATED_ACTIN_NUCLEATION	20	0.541126	1.48451	0.0589391	0.232081	0.991	5330	tags=60%, list=27%, signal=82%
GOBP_RESPONSE_TO_AMINO_ACID_STARVATION	46	0.470967	1.48383	0.0500928	0.232759	0.991	7214	tags=57%, list=37%, signal=89%
GOBP_CELLULAR_RESPONSE_TO_KETONE	91	0.427483	1.48329	0.040146	0.233214	0.991	7865	tags=52%, list=40%, signal=85%
GOBP_ESTABLISHMENT_OF_CELL_POLARITY	132	0.444594	1.48283	0.0486891	0.233533	0.991	6647	tags=51%, list=34%, signal=76%
GOBP_THYMUS_DEVELOPMENT	45	0.454831	1.48249	0.0478821	0.233699	0.991	6248	tags=44%, list=32%, signal=65%
GOBP_EMBRYONIC_CAMERA_TYPE_EYE_MORPHOGENESIS	24	0.498204	1.48224	0.0597826	0.233764	0.991	5242	tags=46%, list=27%, signal=62%
GOBP_REPRODUCTIVE_SYSTEM_DEVELOPMENT	402	0.361592	1.48213	0.0354132	0.233684	0.991	5131	tags=29%, list=26%, signal=39%
GOBP_V_D_J_RECOMBINATION	15	0.594029	1.48136	0.0599613	0.234563	0.991	5972	tags=67%, list=30%, signal=95%
GOBP_RESPONSE_TO_INTERLEUKIN_4	35	0.476158	1.48055	0.100733	0.235412	0.991	6767	tags=49%, list=34%, signal=74%
GOBP_REGULATION_OF_DEFENSE_RESPONSE_TO_VIRUS_BY_HOST	37	0.511021	1.4805	0.0889328	0.235196	0.991	6183	tags=54%, list=31%, signal=79%
GOBP_NEGATIVE_REGULATION_OF_CELL_CYCLE_ARREST	22	0.472863	1.47739	0.0429553	0.239156	0.991	4539	tags=36%, list=23%, signal=47%
GOBP_WATER_SOLUBLE_VITAMIN_METABOLIC_PROCESS	79	0.422472	1.47734	0.0516014	0.23896	0.991	5311	tags=37%, list=27%, signal=50%
GOBP_NEGATIVE_REGULATION_OF_PHOSPHORYLATION	368	0.387663	1.47727	0.0257827	0.238791	0.991	7533	tags=47%, list=38%, signal=75%
GOBP_INTERLEUKIN_1_MEDIATED_SIGNALING_PATHWAY	100	0.469288	1.47678	0.0789474	0.239221	0.991	7682	tags=59%, list=39%, signal=96%
GOBP_POSITIVE_REGULATION_OF_BINDING	163	0.392157	1.47678	0.0341113	0.238949	0.991	3963	tags=31%, list=20%, signal=39%
GOBP_RESPONSE_TO_STEROL	31	0.485448	1.47671	0.0497132	0.238763	0.991	5017	tags=42%, list=25%, signal=56%
GOBP_EPHRIN_RECEPTOR_SIGNALING_PATHWAY	86	0.444608	1.47639	0.054409	0.23893	0.991	6189	tags=48%, list=31%, signal=69%
GOBP_T_CELL_HOMEOSTASIS	36	0.502375	1.47448	0.0860421	0.241324	0.991	4996	tags=50%, list=25%, signal=67%
GOBP_RESPONSE_TO_HYDROGEN_PEROXIDE	126	0.395591	1.47445	0.0378657	0.241108	0.991	5729	tags=37%, list=29%, signal=52%
GOBP_NEGATIVE_REGULATION_OF_STRESS_ACTIVATED_PROTEIN_KINASE_SIGNALING_CASCADE	44	0.458675	1.47422	0.0315399	0.241162	0.991	3376	tags=30%, list=17%, signal=36%
GOBP_ER_NUCLEUS_SIGNALING_PATHWAY	51	0.508707	1.4739	0.0653846	0.241264	0.991	6493	tags=57%, list=33%, signal=84%
GOBP_GLYCOSYL_COMPOUND_METABOLIC_PROCESS	121	0.392507	1.47376	0.0450607	0.241199	0.991	8049	tags=49%, list=41%, signal=82%
GOBP_RESPONSE_TO_REACTIVE_OXYGEN_SPECIES	208	0.377308	1.47366	0.034662	0.241029	0.991	5458	tags=36%, list=28%, signal=49%
GOBP_MICROTUBULE_ORGANIZING_CENTER_LOCALIZATION	28	0.549059	1.47293	0.049904	0.241816	0.991	6245	tags=64%, list=32%, signal=94%
GOBP_INTRACILIARY_TRANSPORT	48	0.512659	1.4725	0.0802348	0.242095	0.991	8132	tags=79%, list=41%, signal=134%
GOBP_RIBOSOMAL_SMALL_SUBUNIT_BIOGENESIS	69	0.554385	1.47241	0.12069	0.241966	0.991	2646	tags=39%, list=13%, signal=45%
GOBP_POSITIVE_REGULATION_OF_LAMELLIPODIUM_ASSEMBLY	28	0.53439	1.472	0.0754717	0.242314	0.991	6136	tags=64%, list=31%, signal=93%
GOBP_RRNA_METHYLATION	21	0.573918	1.47176	0.0958904	0.242355	0.991	4405	tags=52%, list=22%, signal=67%
GOBP_AXO_DENDRITIC_TRANSPORT	68	0.462275	1.47168	0.0551331	0.242191	0.991	7446	tags=57%, list=38%, signal=92%
GOBP_PYRIMIDINE_RIBONUCLEOTIDE_BIOSYNTHETIC_PROCESS	21	0.526237	1.47139	0.0703971	0.242344	0.991	3796	tags=38%, list=19%, signal=47%
GOBP_REGULATION_OF_DOUBLE_STRAND_BREAK_REPAIR_VIA_NONHOMOLOGOUS_END_JOINING	20	0.5214	1.47068	0.0582707	0.243092	0.991	3891	tags=45%, list=20%, signal=56%
GOBP_RESPONSE_TO_COCAINE	43	0.412856	1.47062	0.0448505	0.242895	0.991	2602	tags=21%, list=13%, signal=24%
GOBP_REGULATION_OF_RESPONSE_TO_OXIDATIVE_STRESS	75	0.420508	1.47062	0.0498221	0.242651	0.991	5348	tags=39%, list=27%, signal=53%
GOBP_RIBONUCLEOSIDE_TRIPHOSPHATE_METABOLIC_PROCESS	62	0.415772	1.47059	0.0568384	0.24241	0.991	6482	tags=47%, list=33%, signal=69%
GOBP_REGULATION_OF_VIRAL_GENOME_REPLICATION	78	0.467888	1.4704	0.0812379	0.242397	0.991	4346	tags=36%, list=22%, signal=46%
GOBP_DEFENSE_RESPONSE_TO_VIRUS	246	0.42198	1.47005	0.100559	0.24261	0.991	8920	tags=62%, list=45%, signal=112%
GOBP_RESPONSE_TO_VIRUS	336	0.405237	1.46897	0.0875233	0.243814	0.991	9284	tags=63%, list=47%, signal=117%
GOBP_REGULATION_OF_DNA_BINDING_TRANSCRIPTION_FACTOR_ACTIVITY	417	0.38163	1.46778	0.0495413	0.245202	0.992	7659	tags=48%, list=39%, signal=76%
GOBP_ASPARTATE_FAMILY_AMINO_ACID_BIOSYNTHETIC_PROCESS	21	0.543227	1.46757	0.0549242	0.245218	0.992	5582	tags=62%, list=28%, signal=86%
GOBP_REGULATION_OF_PROTEIN_IMPORT	58	0.442191	1.46756	0.043088	0.24496	0.992	6750	tags=48%, list=34%, signal=73%
GOBP_RIBOSOMAL_LARGE_SUBUNIT_BIOGENESIS	68	0.583139	1.46729	0.126953	0.245062	0.992	6627	tags=71%, list=34%, signal=106%
GOBP_ANTIGEN_PROCESSING_AND_PRESENTATION_OF_PEPTIDE_ANTIGEN	189	0.451033	1.46626	0.0949721	0.246257	0.992	7781	tags=59%, list=39%, signal=96%
GOBP_PROTEIN_TRANSPORT_ALONG_MICROTUBULE	63	0.473647	1.46546	0.0894942	0.247066	0.992	8132	tags=70%, list=41%, signal=118%
GOBP_NIK_NF_KAPPAB_SIGNALING	165	0.421988	1.46454	0.0739372	0.248111	0.992	8679	tags=61%, list=44%, signal=108%
GOBP_B_CELL_ACTIVATION_INVOLVED_IN_IMMUNE_RESPONSE	73	0.474973	1.46445	0.109589	0.247938	0.992	7482	tags=62%, list=38%, signal=99%
GOBP_REGULATION_OF_GTPASE_ACTIVITY	465	0.406097	1.46419	0.0609524	0.248037	0.992	7070	tags=48%, list=36%, signal=72%
GOBP_DENDRITE_EXTENSION	34	0.446696	1.46379	0.0625	0.248337	0.992	5382	tags=35%, list=27%, signal=48%
GOBP_B_CELL_ACTIVATION	244	0.431087	1.46364	0.118908	0.248284	0.992	7482	tags=55%, list=38%, signal=87%
GOBP_NEGATIVE_REGULATION_OF_DEFENSE_RESPONSE_TO_VIRUS	20	0.551282	1.46258	0.0857143	0.249457	0.992	6559	tags=65%, list=33%, signal=97%
GOBP_REGULATION_OF_CHROMATIN_ASSEMBLY	18	0.55564	1.46209	0.0672897	0.249956	0.992	4051	tags=56%, list=21%, signal=70%
GOBP_ORGANELLE_TRANSPORT_ALONG_MICROTUBULE	77	0.461183	1.46208	0.104673	0.249691	0.992	6321	tags=55%, list=32%, signal=80%
GOBP_ANTIGEN_PROCESSING_AND_PRESENTATION	229	0.442342	1.46141	0.103189	0.250428	0.992	7888	tags=60%, list=40%, signal=99%
GOBP_ANDROGEN_RECEPTOR_SIGNALING_PATHWAY	39	0.501905	1.46058	0.055336	0.251288	0.992	7547	tags=64%, list=38%, signal=104%
GOBP_POSITIVE_REGULATION_OF_CELLULAR_COMPONENT_BIOGENESIS	493	0.384816	1.46037	0.0404412	0.251326	0.992	6245	tags=41%, list=32%, signal=59%
GOBP_SULFATE_TRANSPORT	18	0.49199	1.46035	0.0731707	0.25108	0.992	6218	tags=39%, list=31%, signal=57%
GOBP_CARBOHYDRATE_BIOSYNTHETIC_PROCESS	202	0.362991	1.46	0.0370995	0.251301	0.992	7465	tags=42%, list=38%, signal=66%
GOBP_LYMPHOCYTE_APOPTOTIC_PROCESS	70	0.437618	1.45965	0.0976059	0.251531	0.992	9054	tags=69%, list=46%, signal=126%
GOBP_REGULATION_OF_PROTEIN_SUMOYLATION	25	0.508584	1.45957	0.0724907	0.251349	0.992	5682	tags=48%, list=29%, signal=67%
GOBP_POSITIVE_REGULATION_OF_DEFENSE_RESPONSE_TO_VIRUS_BY_HOST	27	0.522592	1.45862	0.11332	0.25235	0.992	6183	tags=59%, list=31%, signal=86%
GOBP_REGULATION_OF_INTRINSIC_APOPTOTIC_SIGNALING_PATHWAY_IN_RESPONSE_TO_DNA_DAMAGE	35	0.456458	1.45848	0.0580762	0.252284	0.992	5013	tags=37%, list=25%, signal=50%
GOBP_NEGATIVE_REGULATION_OF_OXIDATIVE_STRESS_INDUCED_CELL_DEATH	39	0.434038	1.45847	0.0685921	0.25203	0.992	6322	tags=44%, list=32%, signal=64%
GOBP_GENERATION_OF_PRECURSOR_METABOLITES_AND_ENERGY	482	0.365899	1.45827	0.0896309	0.252028	0.992	6497	tags=38%, list=33%, signal=55%
GOBP_TUMOR_NECROSIS_FACTOR_MEDIATED_SIGNALING_PATHWAY	166	0.414636	1.45815	0.102941	0.251913	0.992	7828	tags=54%, list=40%, signal=88%
GOBP_VIRAL_TRANSLATION	15	0.63952	1.45762	0.0936903	0.252377	0.992	6037	tags=87%, list=31%, signal=125%
GOBP_POSITIVE_REGULATION_OF_DEFENSE_RESPONSE	335	0.388144	1.45748	0.0972973	0.252306	0.992	8649	tags=53%, list=44%, signal=92%
GOBP_IMMUNOGLOBULIN_PRODUCTION_INVOLVED_IN_IMMUNOGLOBULIN_MEDIATED_IMMUNE_RESPONSE	48	0.491322	1.45744	0.104854	0.252103	0.992	4415	tags=44%, list=22%, signal=56%
GOBP_PROTEIN_TRANSMEMBRANE_IMPORT_INTO_INTRACELLULAR_ORGANELLE	35	0.533356	1.45705	0.109405	0.252381	0.992	6211	tags=63%, list=31%, signal=92%
GOBP_REGULATION_OF_DENDRITE_DEVELOPMENT	95	0.409515	1.45689	0.0559441	0.25234	0.992	8737	tags=56%, list=44%, signal=100%
GOBP_REGULATION_OF_MITOCHONDRIAL_FISSION	24	0.520662	1.45681	0.0666667	0.252173	0.992	6064	tags=50%, list=31%, signal=72%
GOBP_REGULATION_OF_CYSTEINE_TYPE_ENDOPEPTIDASE_ACTIVITY	220	0.370313	1.45592	0.0427807	0.253163	0.992	7385	tags=45%, list=37%, signal=70%
GOBP_SULFUR_COMPOUND_TRANSPORT	49	0.418401	1.45532	0.059754	0.253737	0.992	5666	tags=35%, list=29%, signal=49%
GOBP_CELLULAR_RESPONSE_TO_DSRNA	20	0.513042	1.45472	0.0791075	0.254303	0.992	6112	tags=50%, list=31%, signal=72%
GOBP_FOREBRAIN_DEVELOPMENT	349	0.373416	1.45456	0.0452174	0.254263	0.992	7653	tags=43%, list=39%, signal=68%
GOBP_CELLULAR_AMINO_ACID_METABOLIC_PROCESS	295	0.390049	1.45451	0.0759717	0.254063	0.992	4795	tags=32%, list=24%, signal=41%
GOBP_NON_MOTILE_CILIUM_ASSEMBLY	50	0.497922	1.45427	0.0823529	0.25413	0.993	7937	tags=70%, list=40%, signal=117%
GOBP_CELLULAR_RESPONSE_TO_INTERFERON_BETA	19	0.515588	1.45423	0.0984556	0.253911	0.993	6574	tags=58%, list=33%, signal=87%
GOBP_REGULATION_OF_GENE_EXPRESSION_BY_GENETIC_IMPRINTING	16	0.525442	1.45335	0.0812854	0.254861	0.993	7118	tags=63%, list=36%, signal=98%
GOBP_CELLULAR_RESPONSE_TO_OXYGEN_LEVELS	215	0.380488	1.45326	0.0491228	0.254703	0.993	4969	tags=33%, list=25%, signal=43%
GOBP_STRESS_ACTIVATED_PROTEIN_KINASE_SIGNALING_CASCADE	261	0.402812	1.45309	0.0616822	0.254688	0.993	7890	tags=55%, list=40%, signal=90%
GOBP_ESTABLISHMENT_OF_MITOCHONDRION_LOCALIZATION	24	0.497605	1.453	0.0578035	0.254544	0.993	2561	tags=33%, list=13%, signal=38%
GOBP_NEGATIVE_REGULATION_OF_PEPTIDYL_TYROSINE_PHOSPHORYLATION	51	0.479169	1.45287	0.0669291	0.254459	0.993	3976	tags=39%, list=20%, signal=49%
GOBP_CELLULAR_RESPONSE_TO_HYDROGEN_PEROXIDE	81	0.41845	1.45271	0.0590406	0.25439	0.993	5441	tags=40%, list=28%, signal=54%
GOBP_PSEUDOURIDINE_SYNTHESIS	18	0.621044	1.45263	0.109804	0.254217	0.993	4983	tags=67%, list=25%, signal=89%
GOBP_LYMPHOCYTE_HOMEOSTASIS	56	0.485551	1.45239	0.133962	0.254281	0.993	8822	tags=79%, list=45%, signal=142%
GOBP_NEGATIVE_REGULATION_OF_GLUCONEOGENESIS	16	0.497232	1.45152	0.0744102	0.255281	0.993	3675	tags=38%, list=19%, signal=46%
GOBP_VESICLE_CYTOSKELETAL_TRAFFICKING	69	0.459081	1.45125	0.0876191	0.255352	0.993	7446	tags=62%, list=38%, signal=100%
GOBP_CELLULAR_RESPONSE_TO_GONADOTROPIN_STIMULUS	15	0.53634	1.45074	0.0767754	0.255835	0.993	4016	tags=33%, list=20%, signal=42%
GOBP_PYRIMIDINE_RIBONUCLEOTIDE_METABOLIC_PROCESS	28	0.462841	1.45026	0.0749543	0.256259	0.993	3796	tags=32%, list=19%, signal=40%
GOBP_ENDOSOMAL_TRANSPORT	219	0.436874	1.45015	0.0833333	0.256151	0.993	7640	tags=60%, list=39%, signal=97%
GOBP_POSITIVE_REGULATION_OF_CELLULAR_RESPONSE_TO_INSULIN_STIMULUS	23	0.515986	1.45004	0.0728347	0.256027	0.993	5398	tags=43%, list=27%, signal=60%
GOBP_PHOSPHATIDYLINOSITOL_BIOSYNTHETIC_PROCESS	115	0.443055	1.44973	0.0552381	0.256221	0.993	7774	tags=60%, list=39%, signal=98%
GOBP_POSITIVE_REGULATION_OF_CARBOHYDRATE_METABOLIC_PROCESS	73	0.405999	1.44952	0.056042	0.256241	0.993	7711	tags=48%, list=39%, signal=78%
GOBP_POSITIVE_REGULATION_OF_MITOCHONDRIAL_FISSION	15	0.577526	1.4495	0.0886793	0.256008	0.993	6064	tags=60%, list=31%, signal=87%
GOBP_ACETYL_COA_BIOSYNTHETIC_PROCESS_FROM_PYRUVATE	15	0.561514	1.44905	0.0960452	0.256469	0.993	4861	tags=60%, list=25%, signal=80%
GOBP_POSITIVE_REGULATION_OF_GTPASE_ACTIVITY	392	0.40287	1.44876	0.0684411	0.256633	0.993	7070	tags=48%, list=36%, signal=73%
GOBP_GOLGI_VESICLE_TRANSPORT	362	0.418277	1.44871	0.106618	0.256463	0.993	7800	tags=56%, list=39%, signal=91%
GOBP_PROTEIN_POLYMERIZATION	274	0.376977	1.44752	0.0364299	0.25782	0.993	6485	tags=43%, list=33%, signal=63%
GOBP_POSITIVE_REGULATION_OF_T_CELL_MIGRATION	29	0.494799	1.4473	0.116981	0.257822	0.993	6768	tags=55%, list=34%, signal=84%
GOBP_POSITIVE_REGULATION_OF_RESPONSE_TO_CYTOKINE_STIMULUS	55	0.47213	1.44695	0.101562	0.258013	0.993	6112	tags=51%, list=31%, signal=74%
GOBP_REGULATION_OF_IMMUNOGLOBULIN_PRODUCTION	60	0.452922	1.44655	0.117063	0.2583	0.993	7482	tags=53%, list=38%, signal=86%
GOBP_RETROGRADE_VESICLE_MEDIATED_TRANSPORT_GOLGI_TO_ENDOPLASMIC_RETICULUM	85	0.482848	1.44598	0.108159	0.258883	0.994	5854	tags=48%, list=30%, signal=68%
GOBP_RETROGRADE_TRANSPORT_ENDOSOME_TO_GOLGI	80	0.485503	1.44591	0.1079	0.258709	0.994	7640	tags=69%, list=39%, signal=112%
GOBP_POSITIVE_REGULATION_OF_PEPTIDASE_ACTIVITY	187	0.376164	1.44574	0.0607143	0.258692	0.994	4485	tags=30%, list=23%, signal=39%
GOBP_POSITIVE_REGULATION_OF_ANION_TRANSPORT	466	0.350783	1.4457	0.0121317	0.258466	0.994	6924	tags=39%, list=35%, signal=59%
GOBP_REGULATION_OF_PHOSPHOPROTEIN_PHOSPHATASE_ACTIVITY	114	0.402024	1.44474	0.0478821	0.259636	0.994	5130	tags=37%, list=26%, signal=49%
GOBP_REGULATION_OF_KILLING_OF_CELLS_OF_OTHER_ORGANISM	16	0.555675	1.44449	0.122605	0.259717	0.994	5798	tags=50%, list=29%, signal=71%
GOBP_POSITIVE_REGULATION_OF_GLIAL_CELL_PROLIFERATION	15	0.540162	1.44434	0.0761905	0.259664	0.994	6113	tags=53%, list=31%, signal=77%
GOBP_DEOXYRIBONUCLEOSIDE_TRIPHOSPHATE_METABOLIC_PROCESS	15	0.585213	1.44419	0.0810277	0.259611	0.994	6488	tags=67%, list=33%, signal=99%
GOBP_CYTOPLASMIC_MICROTUBULE_ORGANIZATION	60	0.473665	1.44375	0.079922	0.259928	0.994	6503	tags=52%, list=33%, signal=77%
GOBP_ACTIVATION_OF_CYSTEINE_TYPE_ENDOPEPTIDASE_ACTIVITY_INVOLVED_IN_APOPTOTIC_PROCESS	84	0.413979	1.44322	0.053407	0.260443	0.994	4897	tags=36%, list=25%, signal=47%
GOBP_POSITIVE_REGULATION_OF_INTRINSIC_APOPTOTIC_SIGNALING_PATHWAY	53	0.435739	1.44294	0.0805861	0.26055	0.994	5076	tags=38%, list=26%, signal=51%
GOBP_PROTEIN_NEDDYLATION	17	0.533785	1.44241	0.107075	0.261114	0.994	2844	tags=29%, list=14%, signal=34%
GOBP_RRNA_MODIFICATION	33	0.548844	1.44236	0.123314	0.260908	0.994	4983	tags=55%, list=25%, signal=73%
GOBP_LIPID_PHOSPHORYLATION	67	0.455982	1.44221	0.079096	0.260853	0.994	6354	tags=52%, list=32%, signal=77%
GOBP_DEFINITIVE_HEMOPOIESIS	19	0.528748	1.44129	0.101533	0.26194	0.994	3129	tags=26%, list=16%, signal=31%
GOBP_POSITIVE_REGULATION_OF_PROTEIN_POLYMERIZATION	121	0.396617	1.44078	0.0588235	0.262425	0.994	6352	tags=47%, list=32%, signal=69%
GOBP_POSITIVE_REGULATION_OF_MITOCHONDRIAL_TRANSLATION	15	0.603488	1.44069	0.107004	0.26229	0.994	2795	tags=53%, list=14%, signal=62%
GOBP_DENDRITIC_SPINE_DEVELOPMENT	96	0.435334	1.44026	0.0726257	0.262628	0.994	8103	tags=57%, list=41%, signal=97%
GOBP_NUCLEAR_ENVELOPE_REASSEMBLY	18	0.576458	1.43994	0.0848126	0.262734	0.994	2853	tags=44%, list=14%, signal=52%
GOBP_PYRIMIDINE_DEOXYRIBONUCLEOTIDE_METABOLIC_PROCESS	22	0.513945	1.43993	0.0789474	0.262492	0.994	3762	tags=32%, list=19%, signal=39%
GOBP_MITOCHONDRION_LOCALIZATION	46	0.445324	1.43953	0.060219	0.262848	0.994	5331	tags=41%, list=27%, signal=56%
GOBP_POLYOL_CATABOLIC_PROCESS	24	0.478039	1.43924	0.0700758	0.263001	0.995	8173	tags=67%, list=41%, signal=114%
GOBP_GUANOSINE_CONTAINING_COMPOUND_METABOLIC_PROCESS	38	0.462284	1.4392	0.0754717	0.262819	0.995	8049	tags=61%, list=41%, signal=102%
GOBP_REGULATION_OF_CELLULAR_RESPIRATION	21	0.500987	1.43901	0.0808824	0.262872	0.995	4029	tags=43%, list=20%, signal=54%
GOBP_ACTIN_NUCLEATION	46	0.448541	1.4388	0.0750469	0.262927	0.995	6352	tags=54%, list=32%, signal=80%
GOBP_JNK_CASCADE	182	0.40366	1.43834	0.0685185	0.263347	0.995	7630	tags=53%, list=39%, signal=86%
GOBP_NEURON_DEATH	328	0.371533	1.43777	0.04947	0.263912	0.995	7856	tags=48%, list=40%, signal=79%
GOBP_POSITIVE_REGULATION_OF_ATPASE_ACTIVITY	57	0.427575	1.43774	0.0724907	0.263712	0.995	4915	tags=35%, list=25%, signal=47%
GOBP_NEGATIVE_REGULATION_OF_CYCLIN_DEPENDENT_PROTEIN_KINASE_ACTIVITY	30	0.469714	1.43696	0.0674157	0.264584	0.995	5178	tags=47%, list=26%, signal=63%
GOBP_REGULATION_OF_PROTEIN_DEACETYLATION	42	0.453746	1.43675	0.0545113	0.264657	0.995	6493	tags=55%, list=33%, signal=81%
GOBP_MITOCHONDRIAL_GENE_EXPRESSION	158	0.529142	1.43663	0.151277	0.264549	0.995	4576	tags=51%, list=23%, signal=65%
GOBP_3_UTR_MEDIATED_MRNA_DESTABILIZATION	17	0.553743	1.43648	0.083871	0.264525	0.995	5243	tags=47%, list=27%, signal=64%
GOBP_REGULATION_OF_RESPONSE_TO_CYTOKINE_STIMULUS	167	0.414223	1.43629	0.0883459	0.264548	0.995	6672	tags=47%, list=34%, signal=70%
GOBP_MULTICELLULAR_ORGANISM_AGING	30	0.449213	1.43562	0.0699816	0.265224	0.995	6975	tags=47%, list=35%, signal=72%
GOBP_NEGATIVE_REGULATION_OF_RECEPTOR_SIGNALING_PATHWAY_VIA_STAT	24	0.515519	1.43538	0.0628571	0.2653	0.995	3969	tags=42%, list=20%, signal=52%
GOBP_POSITIVE_REGULATION_OF_CYSTEINE_TYPE_ENDOPEPTIDASE_ACTIVITY	144	0.380987	1.43515	0.0605505	0.265354	0.995	5267	tags=35%, list=27%, signal=47%
GOBP_T_CELL_APOPTOTIC_PROCESS	49	0.446787	1.4351	0.110906	0.265164	0.995	8839	tags=67%, list=45%, signal=122%
GOBP_REGULATION_OF_CELLULAR_RESPONSE_TO_INSULIN_STIMULUS	62	0.443464	1.43433	0.0534351	0.266005	0.995	5604	tags=40%, list=28%, signal=56%
GOBP_POSITIVE_REGULATION_OF_WNT_SIGNALING_PATHWAY	174	0.398278	1.43418	0.066787	0.265991	0.995	6175	tags=43%, list=31%, signal=62%
GOBP_PROTEIN_HOMOOLIGOMERIZATION	176	0.357141	1.43306	0.0268456	0.267313	0.995	6952	tags=36%, list=35%, signal=55%
GOBP_RESPONSE_TO_ALCOHOL	230	0.348541	1.43303	0.0480132	0.267072	0.995	6584	tags=34%, list=33%, signal=50%
GOBP_STEROL_BIOSYNTHETIC_PROCESS	71	0.450062	1.43253	0.114662	0.267527	0.995	5187	tags=41%, list=26%, signal=55%
GOBP_PROTEIN_FOLDING	215	0.396065	1.43152	0.104425	0.268743	0.995	4206	tags=31%, list=21%, signal=39%
GOBP_REGULATION_OF_MYELOID_CELL_DIFFERENTIATION	222	0.401208	1.43109	0.0806754	0.269097	0.995	6240	tags=41%, list=32%, signal=59%
GOBP_POSITIVE_REGULATION_OF_TRANSCRIPTION_OF_NOTCH_RECEPTOR_TARGET	18	0.608449	1.43094	0.0645161	0.269038	0.995	5890	tags=61%, list=30%, signal=87%
GOBP_POSITIVE_REGULATION_OF_IMMUNOGLOBULIN_PRODUCTION	38	0.462899	1.43093	0.10241	0.26878	0.995	4151	tags=32%, list=21%, signal=40%
GOBP_LAMELLIPODIUM_ORGANIZATION	84	0.44807	1.4309	0.0786517	0.268547	0.995	7602	tags=54%, list=38%, signal=87%
GOBP_NEURON_DEATH_IN_RESPONSE_TO_OXIDATIVE_STRESS	23	0.507173	1.43025	0.0797774	0.269284	0.995	2948	tags=35%, list=15%, signal=41%
GOBP_REGULATION_OF_ENDOPLASMIC_RETICULUM_UNFOLDED_PROTEIN_RESPONSE	27	0.52625	1.43005	0.0592885	0.269293	0.995	4420	tags=44%, list=22%, signal=57%
GOBP_RESPONSE_TO_DEXAMETHASONE	38	0.436832	1.42993	0.0582192	0.26919	0.995	2882	tags=21%, list=15%, signal=25%
GOBP_SPLEEN_DEVELOPMENT	33	0.457716	1.4297	0.0796296	0.269263	0.995	4537	tags=36%, list=23%, signal=47%
GOBP_TOLL_LIKE_RECEPTOR_SIGNALING_PATHWAY	148	0.42508	1.42957	0.104478	0.269187	0.995	7638	tags=53%, list=39%, signal=86%
GOBP_MICROTUBULE_BASED_TRANSPORT	176	0.421138	1.42907	0.094697	0.269614	0.995	8132	tags=59%, list=41%, signal=99%
GOBP_REGULATION_OF_STEROID_METABOLIC_PROCESS	114	0.378957	1.42906	0.0748663	0.26937	0.995	4895	tags=31%, list=25%, signal=41%
GOBP_REGULATION_OF_DEFENSE_RESPONSE_TO_VIRUS_BY_VIRUS	29	0.519848	1.42898	0.12381	0.269214	0.995	6973	tags=72%, list=35%, signal=112%
GOBP_POSITIVE_REGULATION_OF_LEUKOCYTE_APOPTOTIC_PROCESS	26	0.484808	1.42887	0.120229	0.269115	0.995	9054	tags=81%, list=46%, signal=149%
GOBP_RESPONSE_TO_GONADOTROPIN	24	0.486134	1.42824	0.0954955	0.269706	0.995	4016	tags=29%, list=20%, signal=37%
GOBP_PENTOSE_METABOLIC_PROCESS	15	0.566717	1.42823	0.120438	0.269447	0.995	1276	tags=33%, list=6%, signal=36%
GOBP_REGULATION_OF_HEMOPOIESIS	373	0.396751	1.42677	0.118421	0.271373	0.996	6459	tags=42%, list=33%, signal=61%
GOBP_CRANIAL_SKELETAL_SYSTEM_DEVELOPMENT	65	0.436507	1.42615	0.0802139	0.272019	0.996	7598	tags=48%, list=38%, signal=77%
GOBP_REGULATION_OF_GLUCOSE_METABOLIC_PROCESS	108	0.372065	1.42531	0.0536673	0.273003	0.996	7465	tags=45%, list=38%, signal=73%
GOBP_RESPONSE_TO_DRUG	353	0.331413	1.42493	0.0414013	0.273251	0.996	5457	tags=26%, list=28%, signal=36%
GOBP_MITOCHONDRIAL_FUSION	25	0.509837	1.42479	0.0932836	0.273176	0.996	4271	tags=48%, list=22%, signal=61%
GOBP_VIRAL_RNA_GENOME_REPLICATION	33	0.489197	1.42456	0.0673077	0.273229	0.996	4575	tags=42%, list=23%, signal=55%
GOBP_NEURAL_TUBE_DEVELOPMENT	145	0.416338	1.42412	0.0746812	0.273613	0.996	6223	tags=43%, list=32%, signal=62%
GOBP_MULTICELLULAR_ORGANISM_GROWTH	126	0.383936	1.42375	0.072695	0.273845	0.996	7891	tags=46%, list=40%, signal=76%
GOBP_FIBROBLAST_MIGRATION	41	0.482271	1.42343	0.0760234	0.274	0.996	7798	tags=66%, list=39%, signal=109%
GOBP_RAB_PROTEIN_SIGNAL_TRANSDUCTION	21	0.507436	1.42337	0.0594059	0.27383	0.996	5954	tags=67%, list=30%, signal=95%
GOBP_PEPTIDYL_TYROSINE_DEPHOSPHORYLATION	98	0.415044	1.42302	0.0576208	0.27408	0.996	7423	tags=50%, list=38%, signal=80%
GOBP_REGULATION_OF_CARBOHYDRATE_BIOSYNTHETIC_PROCESS	89	0.383563	1.4224	0.0347349	0.274682	0.996	7465	tags=46%, list=38%, signal=74%
GOBP_LAMELLIPODIUM_ASSEMBLY	68	0.453855	1.42236	0.0850662	0.274468	0.996	7602	tags=54%, list=38%, signal=88%
GOBP_POSITIVE_REGULATION_OF_PROTEIN_ACETYLATION	43	0.444689	1.42197	0.0852273	0.274722	0.996	7000	tags=53%, list=35%, signal=83%
GOBP_REGULATION_OF_MICROTUBULE_POLYMERIZATION	48	0.428775	1.42191	0.0656934	0.27453	0.996	7627	tags=58%, list=39%, signal=95%
GOBP_REGULATION_OF_ISOTYPE_SWITCHING	29	0.506257	1.4218	0.0817996	0.274426	0.996	4348	tags=45%, list=22%, signal=57%
GOBP_POSITIVE_REGULATION_OF_PROTEIN_AUTOPHOSPHORYLATION	26	0.532791	1.42136	0.0665399	0.274832	0.996	7533	tags=62%, list=38%, signal=99%
GOBP_MHC_CLASS_II_BIOSYNTHETIC_PROCESS	17	0.528586	1.42112	0.12549	0.274899	0.996	6672	tags=47%, list=34%, signal=71%
GOBP_MYELOID_CELL_DIFFERENTIATION	378	0.389088	1.42035	0.0861423	0.275746	0.996	7535	tags=47%, list=38%, signal=74%
GOBP_CELL_GROWTH	446	0.362212	1.42028	0.0547703	0.275603	0.996	5826	tags=34%, list=29%, signal=48%
GOBP_RECEPTOR_LOCALIZATION_TO_SYNAPSE	51	0.432796	1.41995	0.0990991	0.27583	0.996	8518	tags=55%, list=43%, signal=96%
GOBP_POSITIVE_REGULATION_OF_CELL_GROWTH	147	0.379457	1.41989	0.0607143	0.275626	0.996	5825	tags=35%, list=29%, signal=49%
GOBP_NEGATIVE_REGULATION_OF_PROTEIN_SERINE_THREONINE_KINASE_ACTIVITY	132	0.390994	1.41967	0.0701439	0.2757	0.996	6232	tags=39%, list=32%, signal=57%
GOBP_POSITIVE_REGULATION_OF_CILIUM_ASSEMBLY	20	0.507254	1.41945	0.105769	0.275776	0.996	5029	tags=45%, list=25%, signal=60%
GOBP_REGULATION_OF_CELL_ADHESION_MEDIATED_BY_INTEGRIN	47	0.444754	1.41944	0.108209	0.275518	0.996	5472	tags=47%, list=28%, signal=65%
GOBP_REGULATION_OF_T_CELL_DIFFERENTIATION	142	0.434366	1.41906	0.153398	0.275776	0.996	6821	tags=49%, list=35%, signal=75%
GOBP_REGULATION_OF_SMALL_GTPASE_MEDIATED_SIGNAL_TRANSDUCTION	310	0.412912	1.41877	0.102662	0.275926	0.996	7069	tags=48%, list=36%, signal=74%
GOBP_POSITIVE_REGULATION_OF_INTERLEUKIN_2_PRODUCTION	30	0.533033	1.41871	0.14741	0.275737	0.996	7385	tags=67%, list=37%, signal=106%
GOBP_RESPONSE_TO_STARVATION	185	0.385211	1.41826	0.0619308	0.276191	0.996	6593	tags=42%, list=33%, signal=63%
GOBP_PRODUCTION_OF_MOLECULAR_MEDIATOR_OF_IMMUNE_RESPONSE	183	0.400618	1.41744	0.141791	0.277205	0.996	7666	tags=48%, list=39%, signal=78%
GOBP_DENDRITE_DEVELOPMENT	230	0.393244	1.41731	0.0710382	0.27718	0.996	8822	tags=55%, list=45%, signal=99%
GOBP_RESPONSE_TO_NUTRIENT	164	0.351045	1.41713	0.0737018	0.277169	0.996	5118	tags=29%, list=26%, signal=39%
GOBP_CELLULAR_RESPONSE_TO_BIOTIC_STIMULUS	216	0.401855	1.41702	0.132841	0.277057	0.996	7552	tags=47%, list=38%, signal=76%
GOBP_SCF_DEPENDENT_PROTEASOMAL_UBIQUITIN_DEPENDENT_PROTEIN_CATABOLIC_PROCESS	91	0.453119	1.41678	0.123106	0.27714	0.996	4394	tags=40%, list=22%, signal=51%
GOBP_NEGATIVE_REGULATION_OF_GTPASE_ACTIVITY	45	0.451894	1.41641	0.0516899	0.277424	0.996	6791	tags=49%, list=34%, signal=74%
GOBP_NEGATIVE_REGULATION_OF_MITOCHONDRION_ORGANIZATION	44	0.432075	1.41637	0.103387	0.277218	0.996	4538	tags=36%, list=23%, signal=47%
GOBP_NEGATIVE_REGULATION_OF_MYELOID_CELL_DIFFERENTIATION	77	0.408715	1.41616	0.0875233	0.277292	0.996	5727	tags=35%, list=29%, signal=49%
GOBP_POLYOL_METABOLIC_PROCESS	123	0.366864	1.41595	0.0468468	0.277337	0.996	7415	tags=46%, list=38%, signal=74%
GOBP_NEGATIVE_REGULATION_OF_T_CELL_RECEPTOR_SIGNALING_PATHWAY	22	0.513304	1.41592	0.133205	0.277114	0.996	6561	tags=59%, list=33%, signal=88%
GOBP_REGULATION_OF_T_CELL_RECEPTOR_SIGNALING_PATHWAY	39	0.491085	1.41558	0.160243	0.277366	0.996	6809	tags=64%, list=34%, signal=98%
GOBP_NEGATIVE_REGULATION_OF_UBIQUITIN_PROTEIN_TRANSFERASE_ACTIVITY	16	0.539655	1.41551	0.102913	0.277211	0.996	7906	tags=75%, list=40%, signal=125%
GOBP_RESPONSE_TO_PEPTIDE_HORMONE	421	0.354661	1.41504	0.0552677	0.277607	0.996	7508	tags=42%, list=38%, signal=66%
GOBP_N_GLYCAN_PROCESSING	19	0.51421	1.41445	0.0961538	0.278168	0.996	7062	tags=53%, list=36%, signal=82%
GOBP_ACTIVATION_OF_NF_KAPPAB_INDUCING_KINASE_ACTIVITY	18	0.546362	1.41443	0.0697211	0.277927	0.996	6809	tags=67%, list=34%, signal=102%
GOBP_PROTEIN_LOCALIZATION_TO_MICROTUBULE	18	0.520937	1.41429	0.0949612	0.277867	0.997	6503	tags=50%, list=33%, signal=74%
GOBP_PURINE_CONTAINING_COMPOUND_SALVAGE	15	0.524274	1.41422	0.112994	0.277707	0.997	3725	tags=47%, list=19%, signal=57%
GOBP_B_CELL_DIFFERENTIATION	134	0.423357	1.41374	0.141473	0.278152	0.997	7466	tags=51%, list=38%, signal=81%
GOBP_POLYOL_BIOSYNTHETIC_PROCESS	62	0.377003	1.41371	0.0525394	0.277912	0.997	6709	tags=45%, list=34%, signal=68%
GOBP_ACTIVATION_OF_JUN_KINASE_ACTIVITY	36	0.475218	1.41362	0.0925197	0.277782	0.997	7630	tags=67%, list=39%, signal=108%
GOBP_MEMBRANE_FUSION	160	0.387103	1.41347	0.0733945	0.277713	0.997	7483	tags=49%, list=38%, signal=78%
GOBP_GASTRULATION_WITH_MOUTH_FORMING_SECOND	21	0.499692	1.41326	0.0977012	0.277812	0.997	5930	tags=48%, list=30%, signal=68%
GOBP_NEGATIVE_REGULATION_OF_INTRACELLULAR_SIGNAL_TRANSDUCTION	459	0.371384	1.41283	0.0598911	0.278183	0.997	7251	tags=43%, list=37%, signal=67%
GOBP_REGULATION_OF_NITRIC_OXIDE_SYNTHASE_ACTIVITY	46	0.422959	1.41223	0.078853	0.278805	0.997	5459	tags=43%, list=28%, signal=60%
GOBP_ENDOMEMBRANE_SYSTEM_ORGANIZATION	452	0.37818	1.41201	0.0957447	0.278894	0.997	7165	tags=46%, list=36%, signal=70%
GOBP_CELLULAR_RESPONSE_TO_CHOLESTEROL	16	0.531923	1.412	0.100775	0.278645	0.997	5017	tags=50%, list=25%, signal=67%
GOBP_MYD88_DEPENDENT_TOLL_LIKE_RECEPTOR_SIGNALING_PATHWAY	35	0.494208	1.41194	0.132554	0.278495	0.997	7449	tags=60%, list=38%, signal=96%
GOBP_SNRNA_PROCESSING	32	0.470456	1.41126	0.138075	0.279326	0.997	6356	tags=38%, list=32%, signal=55%
GOBP_REGULATION_OF_PROTEIN_TYROSINE_KINASE_ACTIVITY	90	0.428726	1.41093	0.107807	0.279514	0.997	6924	tags=46%, list=35%, signal=70%
GOBP_INTRACELLULAR_ESTROGEN_RECEPTOR_SIGNALING_PATHWAY	54	0.455334	1.41073	0.0910891	0.279612	0.997	7135	tags=56%, list=36%, signal=87%
GOBP_MATERNAL_PLACENTA_DEVELOPMENT	28	0.448489	1.41049	0.0897196	0.279687	0.997	5346	tags=39%, list=27%, signal=54%
GOBP_RESPONSE_TO_PEPTIDE	497	0.355247	1.4096	0.0694445	0.280799	0.997	7554	tags=42%, list=38%, signal=66%
GOBP_REGULATION_OF_DENDRITE_MORPHOGENESIS	63	0.415635	1.40936	0.0613718	0.280889	0.997	8892	tags=62%, list=45%, signal=112%
GOBP_REGULATION_OF_CELL_MATURATION	20	0.48595	1.40889	0.0860215	0.281347	0.997	1524	tags=15%, list=8%, signal=16%
GOBP_REGULATION_OF_ANTIGEN_RECEPTOR_MEDIATED_SIGNALING_PATHWAY	62	0.473717	1.40843	0.166324	0.281755	0.997	6809	tags=60%, list=34%, signal=91%
GOBP_LACTATION	44	0.411147	1.40834	0.0697674	0.28164	0.997	6120	tags=39%, list=31%, signal=56%
GOBP_NEGATIVE_REGULATION_OF_RESPONSE_TO_CYTOKINE_STIMULUS	61	0.415199	1.40826	0.0893855	0.281478	0.997	6322	tags=41%, list=32%, signal=60%
GOBP_REGULATORY_T_CELL_DIFFERENTIATION	33	0.518695	1.40774	0.158203	0.281982	0.997	6821	tags=64%, list=35%, signal=97%
GOBP_EPIDERMAL_GROWTH_FACTOR_RECEPTOR_SIGNALING_PATHWAY	117	0.429939	1.40763	0.125461	0.281886	0.997	8440	tags=56%, list=43%, signal=96%
GOBP_VESICLE_TARGETING	91	0.462007	1.40748	0.137996	0.281862	0.997	7760	tags=65%, list=39%, signal=106%
GOBP_NEGATIVE_REGULATION_OF_MAPK_CASCADE	163	0.380354	1.40716	0.0636364	0.282027	0.997	6968	tags=40%, list=35%, signal=61%
GOBP_NEGATIVE_REGULATION_OF_CD4_POSITIVE_ALPHA_BETA_T_CELL_DIFFERENTIATION	22	0.53225	1.4068	0.14	0.282305	0.997	6362	tags=59%, list=32%, signal=87%
GOBP_NEGATIVE_REGULATION_OF_AUTOPHAGY	78	0.421173	1.40669	0.0927273	0.282214	0.997	7597	tags=55%, list=38%, signal=89%
GOBP_RESPONSE_TO_NERVE_GROWTH_FACTOR	50	0.443921	1.40669	0.0964083	0.281961	0.997	6291	tags=52%, list=32%, signal=76%
GOBP_INTRACELLULAR_STEROID_HORMONE_RECEPTOR_SIGNALING_PATHWAY	109	0.428965	1.40642	0.11368	0.282094	0.997	7256	tags=51%, list=37%, signal=81%
GOBP_PHOSPHATIDYLINOSITOL_METABOLIC_PROCESS	178	0.400458	1.40638	0.102564	0.281895	0.997	8042	tags=54%, list=41%, signal=91%
GOBP_DEVELOPMENT_OF_PRIMARY_SEXUAL_CHARACTERISTICS	214	0.33542	1.40613	0.0390879	0.281972	0.997	7821	tags=38%, list=40%, signal=63%
GOBP_POSITIVE_REGULATION_OF_NF_KAPPAB_TRANSCRIPTION_FACTOR_ACTIVITY	159	0.40257	1.40607	0.0810811	0.281796	0.997	7592	tags=49%, list=38%, signal=79%
GOBP_NEGATIVE_REGULATION_OF_EXTRINSIC_APOPTOTIC_SIGNALING_PATHWAY_VIA_DEATH_DOMAIN_RECEPTORS	39	0.446968	1.40584	0.10536	0.281907	0.997	2602	tags=26%, list=13%, signal=29%
GOBP_NON_CANONICAL_WNT_SIGNALING_PATHWAY	153	0.404454	1.40573	0.0859232	0.281818	0.997	8705	tags=59%, list=44%, signal=106%
GOBP_LEUKOCYTE_APOPTOTIC_PROCESS	100	0.418232	1.40569	0.12334	0.281625	0.997	9054	tags=62%, list=46%, signal=114%
GOBP_NLRP3_INFLAMMASOME_COMPLEX_ASSEMBLY	15	0.527986	1.40563	0.115079	0.281478	0.997	5581	tags=53%, list=28%, signal=74%
GOBP_REGULATION_OF_T_CELL_ACTIVATION	315	0.417736	1.40525	0.176584	0.28179	0.997	7629	tags=54%, list=39%, signal=87%
GOBP_VESICLE_LOCALIZATION	216	0.407809	1.40513	0.121547	0.28172	0.997	8063	tags=58%, list=41%, signal=97%
GOBP_EXOCYTIC_PROCESS	77	0.406074	1.40462	0.0881295	0.282223	0.997	8337	tags=61%, list=42%, signal=105%
GOBP_CEREBRAL_CORTEX_CELL_MIGRATION	37	0.443678	1.40451	0.0902527	0.282125	0.997	7539	tags=51%, list=38%, signal=83%
GOBP_POSITIVE_REGULATION_OF_MICROTUBULE_POLYMERIZATION_OR_DEPOLYMERIZATION	32	0.466943	1.40444	0.0898662	0.281979	0.997	7627	tags=66%, list=39%, signal=107%
GOBP_HEPATOCYTE_GROWTH_FACTOR_RECEPTOR_SIGNALING_PATHWAY	16	0.514615	1.40408	0.113027	0.282287	0.997	7526	tags=56%, list=38%, signal=91%
GOBP_POSITIVE_REGULATION_OF_DNA_BINDING_TRANSCRIPTION_FACTOR_ACTIVITY	261	0.379007	1.40376	0.0800745	0.282487	0.997	7592	tags=47%, list=38%, signal=75%
GOBP_NEGATIVE_REGULATION_OF_RELEASE_OF_CYTOCHROME_C_FROM_MITOCHONDRIA	16	0.535087	1.40361	0.121442	0.282446	0.997	4538	tags=50%, list=23%, signal=65%
GOBP_POSITIVE_REGULATION_OF_LAMELLIPODIUM_ORGANIZATION	35	0.486662	1.40316	0.0984848	0.282877	0.997	7464	tags=63%, list=38%, signal=101%
GOBP_PROTEIN_IMPORT_INTO_MITOCHONDRIAL_MATRIX	19	0.582135	1.40256	0.140594	0.283542	0.997	6742	tags=68%, list=34%, signal=104%
GOBP_PLATELET_MORPHOGENESIS	20	0.519201	1.4024	0.0886793	0.283512	0.997	3379	tags=35%, list=17%, signal=42%
GOBP_PROTEIN_DEPOLYMERIZATION	105	0.422116	1.4024	0.103131	0.283265	0.997	6673	tags=46%, list=34%, signal=69%
GOBP_PROTEIN_AUTOPROCESSING	23	0.455898	1.40166	0.0869565	0.284209	0.997	1072	tags=17%, list=5%, signal=18%
GOBP_POST_TRANSLATIONAL_PROTEIN_MODIFICATION	353	0.364399	1.40052	0.0880829	0.285651	0.997	5815	tags=34%, list=29%, signal=48%
GOBP_REGULATION_OF_LYMPHOCYTE_DIFFERENTIATION	170	0.426286	1.40011	0.166344	0.285983	0.997	6821	tags=48%, list=35%, signal=73%
GOBP_CELLULAR_RESPONSE_TO_INSULIN_STIMULUS	218	0.378879	1.40004	0.0766423	0.285844	0.997	7465	tags=47%, list=38%, signal=74%
GOBP_NEGATIVE_REGULATION_OF_G_PROTEIN_COUPLED_RECEPTOR_SIGNALING_PATHWAY	46	0.404205	1.40002	0.0805604	0.285611	0.997	5546	tags=35%, list=28%, signal=48%
GOBP_VESICLE_MEDIATED_TRANSPORT_TO_THE_PLASMA_MEMBRANE	83	0.430509	1.39981	0.113208	0.285658	0.997	6648	tags=51%, list=34%, signal=76%
GOBP_SPERMATID_DIFFERENTIATION	144	0.339596	1.39972	0.0844156	0.285528	0.997	6399	tags=28%, list=32%, signal=41%
GOBP_METANEPHRIC_MESENCHYME_DEVELOPMENT	15	0.531262	1.39969	0.104478	0.285338	0.997	4367	tags=33%, list=22%, signal=43%
GOBP_PYRIMIDINE_NUCLEOTIDE_CATABOLIC_PROCESS	19	0.490609	1.39931	0.0990291	0.285649	0.997	3762	tags=32%, list=19%, signal=39%
GOBP_SEX_DIFFERENTIATION	258	0.337147	1.39911	0.0582363	0.285635	0.997	7821	tags=38%, list=40%, signal=62%
GOBP_NEGATIVE_REGULATION_OF_TOR_SIGNALING	37	0.475475	1.39859	0.108317	0.286129	0.997	7984	tags=70%, list=40%, signal=118%
GOBP_RESPONSE_TO_INSULIN	268	0.371641	1.39853	0.0688406	0.285948	0.997	7465	tags=45%, list=38%, signal=72%
GOBP_REGULATION_OF_INTRACELLULAR_ESTROGEN_RECEPTOR_SIGNALING_PATHWAY	36	0.49686	1.39847	0.12426	0.285774	0.997	5144	tags=50%, list=26%, signal=67%
GOBP_MYELOID_CELL_DEVELOPMENT	63	0.430339	1.39826	0.125475	0.285833	0.997	6102	tags=43%, list=31%, signal=62%
GOBP_PEPTIDYL_CYSTEINE_MODIFICATION	46	0.411623	1.39825	0.0673953	0.28559	0.997	6444	tags=43%, list=33%, signal=64%
GOBP_PROTEIN_LOCALIZATION_TO_CILIUM	59	0.453795	1.39753	0.106742	0.286418	0.997	8150	tags=64%, list=41%, signal=109%
GOBP_TORC1_SIGNALING	40	0.469126	1.39733	0.112811	0.286475	0.997	6025	tags=50%, list=31%, signal=72%
GOBP_CELLULAR_CARBOHYDRATE_METABOLIC_PROCESS	269	0.355725	1.39706	0.0409253	0.286603	0.997	7724	tags=45%, list=39%, signal=73%
GOBP_REGULATION_OF_DNA_TEMPLATED_TRANSCRIPTION_IN_RESPONSE_TO_STRESS	111	0.42244	1.39703	0.116788	0.286392	0.997	5833	tags=43%, list=30%, signal=61%
GOBP_MATERNAL_PROCESS_INVOLVED_IN_FEMALE_PREGNANCY	56	0.416767	1.3964	0.0931559	0.287075	0.997	6232	tags=38%, list=32%, signal=55%
GOBP_POSITIVE_REGULATION_OF_ALPHA_BETA_T_CELL_DIFFERENTIATION	48	0.489789	1.39527	0.163743	0.288392	0.997	6809	tags=56%, list=34%, signal=86%
GOBP_ACTIVATION_OF_PROTEIN_KINASE_ACTIVITY	321	0.364119	1.39506	0.0877514	0.288459	0.997	7705	tags=47%, list=39%, signal=75%
GOBP_MODIFICATION_OF_SYNAPTIC_STRUCTURE	19	0.544355	1.39498	0.111111	0.288312	0.997	6751	tags=63%, list=34%, signal=96%
GOBP_PROTEIN_ADP_RIBOSYLATION	31	0.463314	1.39447	0.104854	0.28873	0.997	6235	tags=52%, list=32%, signal=75%
GOBP_POSITIVE_REGULATION_OF_DENDRITIC_SPINE_MORPHOGENESIS	18	0.521399	1.39429	0.124521	0.288726	0.997	3217	tags=39%, list=16%, signal=46%
GOBP_PROTEIN_LOCALIZATION_TO_SYNAPSE	78	0.389657	1.39411	0.0945709	0.288759	0.997	8536	tags=53%, list=43%, signal=92%
GOBP_B_CELL_HOMEOSTASIS	27	0.547009	1.3941	0.136546	0.288524	0.997	4710	tags=59%, list=24%, signal=78%
GOBP_POSITIVE_REGULATION_OF_ALPHA_BETA_T_CELL_ACTIVATION	64	0.487003	1.39397	0.197652	0.288486	0.997	6821	tags=56%, list=35%, signal=86%
GOBP_REGULATION_OF_CILIUM_ASSEMBLY	53	0.431337	1.39338	0.08	0.2891	0.997	8978	tags=66%, list=45%, signal=121%
GOBP_REGULATION_OF_BIOLOGICAL_PROCESS_INVOLVED_IN_SYMBIOTIC_INTERACTION	188	0.378551	1.39262	0.0960145	0.289963	0.997	9047	tags=55%, list=46%, signal=101%
GOBP_LEUKOCYTE_HOMEOSTASIS	78	0.451436	1.39238	0.157088	0.290045	0.997	7462	tags=60%, list=38%, signal=96%
GOBP_POSITIVE_REGULATION_OF_CANONICAL_WNT_SIGNALING_PATHWAY	143	0.393775	1.39198	0.0926916	0.290399	0.997	6175	tags=42%, list=31%, signal=61%
GOBP_VESICLE_DOCKING	65	0.406692	1.39123	0.107664	0.291227	0.997	8337	tags=63%, list=42%, signal=109%
GOBP_REGULATION_OF_CELLULAR_CARBOHYDRATE_METABOLIC_PROCESS	133	0.354178	1.3912	0.0585106	0.291013	0.997	8182	tags=49%, list=41%, signal=83%
GOBP_DENDRITIC_SPINE_MORPHOGENESIS	58	0.426449	1.39118	0.0990654	0.290786	0.997	8556	tags=59%, list=43%, signal=103%
GOBP_ACTIVATION_OF_GTPASE_ACTIVITY	108	0.41329	1.39098	0.0975143	0.290795	0.997	6733	tags=44%, list=34%, signal=67%
GOBP_NUCLEAR_MEMBRANE_ORGANIZATION	16	0.554127	1.39059	0.12326	0.291127	0.997	4773	tags=56%, list=24%, signal=74%
GOBP_ORGANELLE_DISASSEMBLY	100	0.43032	1.39052	0.115672	0.290975	0.997	7142	tags=52%, list=36%, signal=81%
GOBP_GAMMA_DELTA_T_CELL_ACTIVATION	18	0.569256	1.39046	0.146586	0.290798	0.997	4710	tags=50%, list=24%, signal=66%
GOBP_REGULATION_OF_HORMONE_BIOSYNTHETIC_PROCESS	20	0.504931	1.3903	0.10397	0.290778	0.997	4907	tags=50%, list=25%, signal=66%
GOBP_REGULATION_OF_PROTEIN_POLYMERIZATION	208	0.368866	1.38934	0.075	0.291946	0.997	7638	tags=50%, list=39%, signal=81%
GOBP_REGULATION_OF_PROTEIN_BINDING	189	0.359891	1.3893	0.0757042	0.291753	0.997	8300	tags=52%, list=42%, signal=89%
GOBP_REGULATION_OF_OXIDATIVE_STRESS_INDUCED_NEURON_DEATH	19	0.52343	1.38917	0.0963391	0.291684	0.997	5130	tags=47%, list=26%, signal=64%
GOBP_REGULATION_OF_MULTICELLULAR_ORGANISM_GROWTH	59	0.382546	1.38903	0.0684932	0.291618	0.997	7765	tags=41%, list=39%, signal=67%
GOBP_REGULATION_OF_FIBROBLAST_MIGRATION	33	0.487076	1.38813	0.103846	0.292684	0.997	7638	tags=67%, list=39%, signal=109%
GOBP_TOLL_LIKE_RECEPTOR_2_SIGNALING_PATHWAY	16	0.552784	1.38792	0.129293	0.292747	0.997	4660	tags=50%, list=24%, signal=65%
GOBP_VIRAL_RELEASE_FROM_HOST_CELL	33	0.478925	1.38776	0.110694	0.29273	0.997	6796	tags=55%, list=34%, signal=83%
GOBP_NEURON_PROJECTION_ORGANIZATION	88	0.413295	1.38767	0.0833333	0.292604	0.997	8103	tags=56%, list=41%, signal=94%
GOBP_POSITIVE_REGULATION_OF_PEPTIDYL_LYSINE_ACETYLATION	34	0.442108	1.38651	0.105364	0.294063	0.997	6397	tags=50%, list=32%, signal=74%
GOBP_CORTICAL_ACTIN_CYTOSKELETON_ORGANIZATION	38	0.470783	1.38642	0.127341	0.293964	0.997	7539	tags=61%, list=38%, signal=98%
GOBP_ANTEROGRADE_AXONAL_TRANSPORT	46	0.433465	1.3858	0.126177	0.294641	0.997	6169	tags=48%, list=31%, signal=69%
GOBP_NEGATIVE_REGULATION_OF_MICROTUBULE_POLYMERIZATION_OR_DEPOLYMERIZATION	35	0.449101	1.38503	0.0931099	0.295522	0.997	7245	tags=60%, list=37%, signal=95%
GOBP_CELLULAR_RESPONSE_TO_PEPTIDE_HORMONE_STIMULUS	314	0.359148	1.38433	0.0913884	0.296305	0.997	6924	tags=40%, list=35%, signal=60%
GOBP_POSITIVE_REGULATION_OF_POSTTRANSCRIPTIONAL_GENE_SILENCING	30	0.486921	1.38429	0.124016	0.296102	0.997	2899	tags=37%, list=15%, signal=43%
GOBP_DICARBOXYLIC_ACID_METABOLIC_PROCESS	89	0.382427	1.38409	0.0971731	0.29614	0.997	4546	tags=30%, list=23%, signal=39%
GOBP_POSITIVE_REGULATION_OF_PLASMA_MEMBRANE_BOUNDED_CELL_PROJECTION_ASSEMBLY	98	0.404277	1.38406	0.114391	0.295953	0.997	6459	tags=45%, list=33%, signal=66%
GOBP_REGULATION_OF_PATTERN_RECOGNITION_RECEPTOR_SIGNALING_PATHWAY	92	0.42912	1.38401	0.131021	0.29578	0.997	7449	tags=49%, list=38%, signal=78%
GOBP_REGULATION_OF_DENDRITIC_SPINE_MORPHOGENESIS	43	0.442746	1.38389	0.103774	0.295685	0.997	8556	tags=60%, list=43%, signal=106%
GOBP_STEROID_HORMONE_MEDIATED_SIGNALING_PATHWAY	130	0.40866	1.3833	0.129456	0.296286	0.997	7256	tags=48%, list=37%, signal=75%
GOBP_NEGATIVE_REGULATION_OF_HEMOPOIESIS	99	0.402547	1.3833	0.124771	0.296038	0.997	9428	tags=58%, list=48%, signal=110%
GOBP_REGULATION_OF_LYMPHOCYTE_ACTIVATION	417	0.401268	1.38278	0.179732	0.2965	0.997	7629	tags=52%, list=39%, signal=83%
GOBP_PURINE_NUCLEOSIDE_METABOLIC_PROCESS	57	0.411417	1.38138	0.0985402	0.298383	0.997	8049	tags=54%, list=41%, signal=92%
GOBP_SPERM_EGG_RECOGNITION	60	0.371677	1.38119	0.101639	0.298402	0.997	3243	tags=17%, list=16%, signal=20%
GOBP_T_CELL_DIFFERENTIATION	242	0.408768	1.38103	0.180583	0.298369	0.997	8679	tags=57%, list=44%, signal=101%
GOBP_REGULATION_OF_STRESS_ACTIVATED_PROTEIN_KINASE_SIGNALING_CASCADE	173	0.384879	1.38102	0.101289	0.298117	0.997	7970	tags=51%, list=40%, signal=85%
GOBP_ORGANELLE_MEMBRANE_FUSION	104	0.400984	1.38071	0.0921053	0.298312	0.997	5933	tags=44%, list=30%, signal=63%
GOBP_ORGANIC_HYDROXY_COMPOUND_BIOSYNTHETIC_PROCESS	241	0.335972	1.38039	0.0757315	0.29853	0.997	6709	tags=36%, list=34%, signal=53%
GOBP_SUBSTANTIA_NIGRA_DEVELOPMENT	40	0.432239	1.38033	0.122222	0.298375	0.997	4041	tags=35%, list=20%, signal=44%
GOBP_REGULATION_OF_CELL_PROJECTION_ASSEMBLY	175	0.387734	1.38015	0.0929368	0.298388	0.997	6564	tags=43%, list=33%, signal=64%
GOBP_CLATHRIN_COAT_ASSEMBLY	16	0.506664	1.3801	0.112186	0.298218	0.997	6061	tags=63%, list=31%, signal=90%
GOBP_NEGATIVE_REGULATION_OF_RECEPTOR_MEDIATED_ENDOCYTOSIS	28	0.435224	1.37997	0.0960145	0.298164	0.997	8626	tags=61%, list=44%, signal=108%
GOBP_NEGATIVE_REGULATION_OF_LYMPHOCYTE_DIFFERENTIATION	52	0.436091	1.37974	0.155303	0.298257	0.997	6787	tags=46%, list=34%, signal=70%
GOBP_CELLULAR_RESPONSE_TO_PEPTIDE	373	0.357173	1.3797	0.103691	0.298084	0.997	7554	tags=43%, list=38%, signal=68%
GOBP_PROTEIN_TRANSMEMBRANE_TRANSPORT	59	0.460256	1.37913	0.144213	0.298689	0.997	6211	tags=56%, list=31%, signal=81%
GOBP_REGULATION_OF_LAMELLIPODIUM_ORGANIZATION	49	0.458965	1.37908	0.128676	0.298528	0.997	7464	tags=55%, list=38%, signal=88%
GOBP_PHOSPHOLIPID_BIOSYNTHETIC_PROCESS	260	0.365905	1.37887	0.101968	0.298586	0.997	7245	tags=46%, list=37%, signal=72%
GOBP_REGULATION_OF_CELLULAR_KETONE_METABOLIC_PROCESS	174	0.354235	1.37842	0.090136	0.29905	0.997	5960	tags=35%, list=30%, signal=50%
GOBP_RRNA_CATABOLIC_PROCESS	19	0.497265	1.37809	0.132296	0.299268	0.997	6206	tags=58%, list=31%, signal=84%
GOBP_RIBONUCLEOSIDE_METABOLIC_PROCESS	68	0.388255	1.37765	0.072695	0.299646	0.997	8049	tags=50%, list=41%, signal=84%
GOBP_CRISTAE_FORMATION	18	0.493329	1.37762	0.121101	0.299445	0.997	1363	tags=28%, list=7%, signal=30%
GOBP_NEGATIVE_REGULATION_OF_CELL_CELL_ADHESION	172	0.39401	1.37689	0.145488	0.300288	0.997	7585	tags=49%, list=38%, signal=80%
GOBP_MONONUCLEAR_CELL_DIFFERENTIATION	402	0.389793	1.37681	0.171103	0.30014	0.997	9290	tags=59%, list=47%, signal=109%
GOBP_REGULATION_OF_HISTONE_DEACETYLATION	27	0.463505	1.37551	0.0986717	0.30181	0.997	6493	tags=52%, list=33%, signal=77%
GOBP_RESPONSE_TO_KETONE	192	0.349504	1.37543	0.0817391	0.301689	0.997	5871	tags=31%, list=30%, signal=43%
GOBP_CYTOSOLIC_TRANSPORT	152	0.439257	1.3752	0.157692	0.301838	0.997	7640	tags=63%, list=39%, signal=101%
GOBP_SYNAPTIC_VESICLE_CYTOSKELETAL_TRANSPORT	18	0.509647	1.37516	0.142857	0.301639	0.997	7446	tags=72%, list=38%, signal=116%
GOBP_NEGATIVE_REGULATION_OF_NEURON_DEATH	185	0.357577	1.37473	0.0904437	0.301981	0.997	6768	tags=38%, list=34%, signal=58%
GOBP_REGULATION_OF_ALPHA_BETA_T_CELL_DIFFERENTIATION	66	0.469934	1.37418	0.182178	0.302562	0.997	6459	tags=53%, list=33%, signal=79%
GOBP_POSITIVE_REGULATION_OF_DNA_DAMAGE_RESPONSE_SIGNAL_TRANSDUCTION_BY_P53_CLASS_MEDIATOR	15	0.491665	1.3736	0.114878	0.303167	0.997	6212	tags=53%, list=31%, signal=78%
GOBP_CEREBRAL_CORTEX_RADIALLY_ORIENTED_CELL_MIGRATION	27	0.45516	1.37292	0.122083	0.303857	0.997	7539	tags=48%, list=38%, signal=78%
GOBP_BIOLOGICAL_PROCESS_INVOLVED_IN_INTERACTION_WITH_HOST	215	0.366404	1.37266	0.100885	0.30403	0.997	6924	tags=42%, list=35%, signal=64%
GOBP_CELLULAR_METABOLIC_COMPOUND_SALVAGE	32	0.43037	1.37256	0.109689	0.303934	0.997	6652	tags=47%, list=34%, signal=71%
GOBP_INTERLEUKIN_2_PRODUCTION	60	0.461706	1.37247	0.182365	0.303815	0.997	7385	tags=60%, list=37%, signal=96%
GOBP_T_CELL_ACTIVATION	461	0.392633	1.37213	0.191205	0.304075	0.997	8518	tags=56%, list=43%, signal=96%
GOBP_CELLULAR_RESPONSE_TO_ACID_CHEMICAL	63	0.40772	1.37204	0.108656	0.303964	0.997	7250	tags=43%, list=37%, signal=67%
GOBP_REGULATION_OF_ERBB_SIGNALING_PATHWAY	91	0.419896	1.37198	0.110487	0.303801	0.997	8440	tags=53%, list=43%, signal=92%
GOBP_LYMPHOCYTE_ACTIVATION_INVOLVED_IN_IMMUNE_RESPONSE	182	0.398668	1.37192	0.176692	0.30363	0.997	9322	tags=63%, list=47%, signal=119%
GOBP_NOSE_DEVELOPMENT	15	0.527571	1.37116	0.125984	0.304538	0.997	7649	tags=67%, list=39%, signal=109%
GOBP_NUCLEAR_TRANSCRIBED_MRNA_CATABOLIC_PROCESS	198	0.471206	1.37115	0.191939	0.304289	0.997	5514	tags=43%, list=28%, signal=60%
GOBP_PROTEIN_PEPTIDYL_PROLYL_ISOMERIZATION	40	0.425485	1.37092	0.115385	0.304366	0.997	5830	tags=43%, list=30%, signal=60%
GOBP_MAMMARY_GLAND_EPITHELIAL_CELL_PROLIFERATION	25	0.434248	1.37069	0.0936937	0.304505	0.997	4931	tags=32%, list=25%, signal=43%
GOBP_LYMPHOCYTE_COSTIMULATION	59	0.468018	1.37038	0.2	0.304753	0.997	7009	tags=66%, list=35%, signal=102%
GOBP_CELLULAR_RESPONSE_TO_VITAMIN_D	21	0.486732	1.36977	0.124535	0.305482	0.997	3706	tags=29%, list=19%, signal=35%
GOBP_CELLULAR_RESPONSE_TO_GLUCOSE_STARVATION	47	0.432245	1.36922	0.0961538	0.306064	0.997	6593	tags=51%, list=33%, signal=76%
GOBP_B_CELL_APOPTOTIC_PROCESS	24	0.479899	1.36914	0.133333	0.305934	0.997	9054	tags=79%, list=46%, signal=146%
GOBP_MYD88_INDEPENDENT_TOLL_LIKE_RECEPTOR_SIGNALING_PATHWAY	34	0.480543	1.36906	0.140039	0.305802	0.997	8920	tags=74%, list=45%, signal=134%
GOBP_POSITIVE_REGULATION_OF_ENDOTHELIAL_CELL_PROLIFERATION	87	0.387297	1.36848	0.118794	0.306416	0.997	5652	tags=36%, list=29%, signal=50%
GOBP_POSITIVE_REGULATION_OF_RESPONSE_TO_EXTERNAL_STIMULUS	477	0.356159	1.36799	0.139037	0.306896	0.997	8607	tags=48%, list=44%, signal=84%
GOBP_TRICARBOXYLIC_ACID_CYCLE	34	0.51834	1.36797	0.187266	0.306676	0.997	6993	tags=68%, list=35%, signal=105%
GOBP_REGULATION_OF_VIRAL_LIFE_CYCLE	140	0.390723	1.36762	0.123162	0.306922	0.997	9128	tags=57%, list=46%, signal=105%
GOBP_UBIQUITIN_DEPENDENT_PROTEIN_CATABOLIC_PROCESS_VIA_THE_MULTIVESICULAR_BODY_SORTING_PATHWAY	23	0.478723	1.36753	0.101533	0.306785	0.997	6128	tags=48%, list=31%, signal=69%
GOBP_NEURON_APOPTOTIC_PROCESS	220	0.357977	1.3675	0.0714286	0.306604	0.997	9054	tags=56%, list=46%, signal=102%
GOBP_POSITIVE_REGULATION_OF_NEURON_APOPTOTIC_PROCESS	51	0.395199	1.36718	0.0904159	0.306807	0.997	4378	tags=33%, list=22%, signal=43%
GOBP_PEPTIDYL_SERINE_DEPHOSPHORYLATION	19	0.501733	1.3668	0.121951	0.307109	0.997	6497	tags=58%, list=33%, signal=86%
GOBP_COPII_COATED_VESICLE_BUDDING	72	0.445545	1.36667	0.167608	0.307031	0.997	7760	tags=63%, list=39%, signal=103%
GOBP_FIBROBLAST_GROWTH_FACTOR_RECEPTOR_SIGNALING_PATHWAY	104	0.370025	1.36643	0.0996503	0.307127	0.997	4429	tags=27%, list=22%, signal=35%
GOBP_CELLULAR_RESPONSE_TO_STARVATION	147	0.386526	1.36638	0.11413	0.306942	0.997	6593	tags=43%, list=33%, signal=64%
GOBP_NEGATIVE_REGULATION_OF_ANTIGEN_RECEPTOR_MEDIATED_SIGNALING_PATHWAY	29	0.492988	1.36605	0.177866	0.30719	0.997	7201	tags=62%, list=36%, signal=98%
GOBP_RNA_DECAPPING	15	0.537154	1.36602	0.129293	0.306989	0.997	6420	tags=67%, list=32%, signal=99%
GOBP_NEGATIVE_REGULATION_OF_RESPONSE_TO_BIOTIC_STIMULUS	93	0.415487	1.36601	0.141002	0.306759	0.997	5199	tags=38%, list=26%, signal=51%
GOBP_LIMBIC_SYSTEM_DEVELOPMENT	97	0.346905	1.366	0.0775316	0.306524	0.997	7572	tags=35%, list=38%, signal=57%
GOBP_REGULATION_OF_RESPONSE_TO_INTERFERON_GAMMA	25	0.47536	1.3659	0.132438	0.306435	0.997	7441	tags=60%, list=38%, signal=96%
GOBP_VESICLE_DOCKING_INVOLVED_IN_EXOCYTOSIS	44	0.431542	1.36518	0.154851	0.307281	0.997	8337	tags=66%, list=42%, signal=114%
GOBP_POSITIVE_REGULATION_OF_APOPTOTIC_SIGNALING_PATHWAY	115	0.369928	1.36478	0.0976909	0.307618	0.997	5178	tags=34%, list=26%, signal=46%
GOBP_POSITIVE_REGULATION_OF_RESPONSE_TO_ENDOPLASMIC_RETICULUM_STRESS	35	0.460177	1.36453	0.107632	0.307734	0.997	6308	tags=51%, list=32%, signal=75%
GOBP_REGULATION_OF_POSTSYNAPSE_ORGANIZATION	84	0.383274	1.3642	0.0741411	0.308002	0.997	8140	tags=48%, list=41%, signal=81%
GOBP_REGULATION_OF_RECEPTOR_RECYCLING	22	0.47192	1.36411	0.118738	0.307881	0.997	8300	tags=64%, list=42%, signal=110%
GOBP_PHOSPHORYLATED_CARBOHYDRATE_DEPHOSPHORYLATION	16	0.49693	1.36362	0.116323	0.308368	0.997	7856	tags=69%, list=40%, signal=114%
GOBP_COCHLEA_DEVELOPMENT	45	0.386173	1.36344	0.103448	0.308392	0.997	6682	tags=31%, list=34%, signal=47%
GOBP_OOGENESIS	74	0.344624	1.36311	0.0990099	0.30863	0.997	1912	tags=14%, list=10%, signal=15%
GOBP_CELL_DIFFERENTIATION_INVOLVED_IN_EMBRYONIC_PLACENTA_DEVELOPMENT	23	0.463898	1.36308	0.132855	0.308416	0.997	2910	tags=30%, list=15%, signal=36%
GOBP_REGULATION_OF_PROTEIN_AUTOPHOSPHORYLATION	46	0.468092	1.36292	0.150659	0.308409	0.997	7533	tags=54%, list=38%, signal=88%
GOBP_NEGATIVE_REGULATION_OF_DNA_BINDING_TRANSCRIPTION_FACTOR_ACTIVITY	155	0.366108	1.36275	0.100365	0.308391	0.997	7659	tags=47%, list=39%, signal=76%
GOBP_REGULATION_OF_DENDRITIC_SPINE_DEVELOPMENT	58	0.433818	1.36257	0.130755	0.308431	0.997	8822	tags=64%, list=45%, signal=115%
GOBP_CELLULAR_RESPONSE_TO_DEXAMETHASONE_STIMULUS	29	0.440443	1.36245	0.0860215	0.308369	0.997	7724	tags=48%, list=39%, signal=79%
GOBP_SMOOTH_MUSCLE_CELL_APOPTOTIC_PROCESS	22	0.465292	1.36226	0.124521	0.308421	0.997	8182	tags=59%, list=41%, signal=101%
GOBP_REGULATION_OF_EXTRINSIC_APOPTOTIC_SIGNALING_PATHWAY_VIA_DEATH_DOMAIN_RECEPTORS	57	0.414432	1.36223	0.136201	0.308214	0.997	6533	tags=40%, list=33%, signal=60%
GOBP_REGULATION_OF_GASTRULATION	16	0.493789	1.36214	0.116788	0.308118	0.997	3398	tags=31%, list=17%, signal=38%
GOBP_POSITIVE_REGULATION_OF_GLYCOLYTIC_PROCESS	23	0.464113	1.36126	0.129597	0.309194	0.997	6750	tags=43%, list=34%, signal=66%
GOBP_NEGATIVE_REGULATION_OF_ALPHA_BETA_T_CELL_DIFFERENTIATION	26	0.500254	1.36099	0.166	0.30935	0.997	6362	tags=50%, list=32%, signal=74%
GOBP_NEGATIVE_REGULATION_OF_CYSTEINE_TYPE_ENDOPEPTIDASE_ACTIVITY	77	0.370182	1.36086	0.0926916	0.309281	0.997	6978	tags=43%, list=35%, signal=66%
GOBP_NEGATIVE_REGULATION_OF_RECEPTOR_SIGNALING_PATHWAY_VIA_JAK_STAT	23	0.497456	1.3604	0.104046	0.309713	0.997	3969	tags=39%, list=20%, signal=49%
GOBP_POSITIVE_REGULATION_OF_LYMPHOCYTE_APOPTOTIC_PROCESS	16	0.510027	1.36025	0.144509	0.309711	0.997	9054	tags=88%, list=46%, signal=161%
GOBP_POSITIVE_REGULATION_OF_INTERFERON_GAMMA_PRODUCTION	64	0.459576	1.36017	0.218569	0.309588	0.997	7001	tags=55%, list=35%, signal=84%
GOBP_MICROTUBULE_ANCHORING	22	0.534607	1.35954	0.139344	0.310284	0.997	6243	tags=68%, list=32%, signal=100%
GOBP_NEGATIVE_REGULATION_OF_POSTTRANSCRIPTIONAL_GENE_SILENCING	20	0.488305	1.35924	0.0962672	0.310497	0.997	9558	tags=70%, list=48%, signal=135%
GOBP_REGULATION_OF_CYTOSKELETON_ORGANIZATION	480	0.361814	1.35914	0.100548	0.310369	0.997	7638	tags=46%, list=39%, signal=74%
GOBP_PROTEIN_INSERTION_INTO_ER_MEMBRANE	17	0.545468	1.35909	0.162706	0.310239	0.997	6487	tags=53%, list=33%, signal=79%
GOBP_REGULATION_OF_PEPTIDYL_THREONINE_PHOSPHORYLATION	46	0.427488	1.35884	0.115523	0.310405	0.997	8016	tags=50%, list=41%, signal=84%
GOBP_PIGMENT_METABOLIC_PROCESS	71	0.389819	1.35835	0.114583	0.310876	0.997	8283	tags=51%, list=42%, signal=87%
GOBP_POSITIVE_REGULATION_OF_MYELOID_CELL_DIFFERENTIATION	98	0.401339	1.35826	0.118738	0.310747	0.997	6240	tags=41%, list=32%, signal=59%
GOBP_REGULATION_OF_CYSTEINE_TYPE_ENDOPEPTIDASE_ACTIVITY_INVOLVED_IN_APOPTOTIC_SIGNALING_PATHWAY	17	0.506272	1.35811	0.151874	0.310718	0.997	1930	tags=29%, list=10%, signal=33%
GOBP_RESPONSE_TO_PROSTAGLANDIN	30	0.447954	1.3578	0.135338	0.310955	0.997	6459	tags=47%, list=33%, signal=69%
GOBP_CELLULAR_RESPONSE_TO_INORGANIC_SUBSTANCE	208	0.335642	1.35756	0.0620805	0.311045	0.997	6623	tags=34%, list=34%, signal=50%
GOBP_REGULATION_OF_LEUKOCYTE_DIFFERENTIATION	270	0.389201	1.35754	0.168856	0.310829	0.997	9708	tags=61%, list=49%, signal=119%
GOBP_REGULATION_OF_PROTEIN_LOCALIZATION_TO_SYNAPSE	26	0.469639	1.35702	0.15847	0.31139	0.997	8518	tags=69%, list=43%, signal=122%
GOBP_NEGATIVE_REGULATION_OF_LEUKOCYTE_CELL_CELL_ADHESION	122	0.40695	1.35654	0.171271	0.311884	0.997	7585	tags=52%, list=38%, signal=83%
GOBP_REGULATION_OF_INTRACELLULAR_STEROID_HORMONE_RECEPTOR_SIGNALING_PATHWAY	70	0.448809	1.35646	0.147638	0.311749	0.997	6404	tags=50%, list=32%, signal=74%
GOBP_DICARBOXYLIC_ACID_TRANSPORT	92	0.349012	1.35556	0.0900164	0.312879	0.997	8208	tags=47%, list=42%, signal=80%
GOBP_POSITIVE_REGULATION_OF_GLUCOSE_METABOLIC_PROCESS	37	0.414815	1.35482	0.119266	0.313691	0.997	5826	tags=41%, list=29%, signal=57%
GOBP_NEGATIVE_REGULATION_OF_CIRCADIAN_RHYTHM	15	0.504704	1.35481	0.126629	0.313465	0.997	3639	tags=33%, list=18%, signal=41%
GOBP_MRNA_METHYLATION	15	0.552521	1.35431	0.15444	0.313983	0.997	7771	tags=80%, list=39%, signal=132%
GOBP_POSITIVE_REGULATION_OF_MACROAUTOPHAGY	58	0.45458	1.35363	0.173752	0.314747	0.997	8195	tags=66%, list=41%, signal=112%
GOBP_GMP_METABOLIC_PROCESS	15	0.507424	1.35338	0.132039	0.314885	0.997	8584	tags=73%, list=43%, signal=130%
GOBP_NEGATIVE_REGULATION_OF_EXTRINSIC_APOPTOTIC_SIGNALING_PATHWAY	100	0.380211	1.35325	0.11449	0.314803	0.997	7255	tags=46%, list=37%, signal=72%
GOBP_FILOPODIUM_ASSEMBLY	60	0.41774	1.35265	0.125912	0.31542	0.997	6398	tags=45%, list=32%, signal=66%
GOBP_VESICLE_TRANSPORT_ALONG_MICROTUBULE	43	0.461837	1.35239	0.162214	0.315534	0.997	6321	tags=56%, list=32%, signal=82%
GOBP_REGULATION_OF_JNK_CASCADE	125	0.387372	1.35206	0.132597	0.315851	0.997	7403	tags=48%, list=37%, signal=76%
GOBP_ERBB_SIGNALING_PATHWAY	138	0.400269	1.35178	0.154545	0.31604	0.997	7809	tags=47%, list=40%, signal=77%
GOBP_LEUKOCYTE_CELL_CELL_ADHESION	345	0.4012	1.35172	0.203036	0.315904	0.997	7482	tags=51%, list=38%, signal=81%
GOBP_POSITIVE_REGULATION_OF_REPRODUCTIVE_PROCESS	77	0.347433	1.35152	0.112957	0.315932	0.997	1501	tags=13%, list=8%, signal=14%
GOBP_RESPONSE_TO_GROWTH_HORMONE	39	0.415605	1.35128	0.101064	0.316046	0.997	5821	tags=31%, list=29%, signal=44%
GOBP_EXTRINSIC_APOPTOTIC_SIGNALING_PATHWAY_VIA_DEATH_DOMAIN_RECEPTORS	81	0.394556	1.35105	0.127928	0.316185	0.997	6533	tags=38%, list=33%, signal=57%
GOBP_PHAGOCYTOSIS	263	0.388307	1.35081	0.155844	0.316286	0.997	7229	tags=48%, list=37%, signal=74%
GOBP_ENDOPLASMIC_RETICULUM_TO_GOLGI_VESICLE_MEDIATED_TRANSPORT	203	0.396987	1.35078	0.168478	0.316074	0.997	8027	tags=55%, list=41%, signal=92%
GOBP_REGULATION_OF_GOLGI_ORGANIZATION	16	0.538385	1.3507	0.134387	0.315954	0.997	4602	tags=56%, list=23%, signal=73%
GOBP_NEGATIVE_REGULATION_OF_MACROAUTOPHAGY	33	0.467284	1.35022	0.138889	0.31641	0.997	6282	tags=58%, list=32%, signal=84%
GOBP_NEGATIVE_REGULATION_OF_T_CELL_APOPTOTIC_PROCESS	20	0.494177	1.35002	0.130597	0.316447	0.997	5472	tags=45%, list=28%, signal=62%
GOBP_SEX_DETERMINATION	18	0.451877	1.34982	0.115385	0.316532	0.997	2479	tags=22%, list=13%, signal=25%
GOBP_REGULATION_OF_LYMPHOCYTE_APOPTOTIC_PROCESS	53	0.423542	1.34979	0.179775	0.316337	0.997	9054	tags=66%, list=46%, signal=122%
GOBP_OSTEOBLAST_DIFFERENTIATION	200	0.36494	1.34979	0.121908	0.316097	0.997	6313	tags=37%, list=32%, signal=53%
GOBP_REGULATION_OF_PROTEIN_LOCALIZATION_TO_MEMBRANE	189	0.367408	1.34935	0.104015	0.316512	0.997	6561	tags=43%, list=33%, signal=64%
GOBP_REGULATION_OF_TRANSLATION_NCRNA_MEDIATED	17	0.535347	1.34843	0.176	0.317642	0.997	5561	tags=59%, list=28%, signal=82%
GOBP_REGULATION_OF_SYNAPTIC_VESICLE_RECYCLING	23	0.500008	1.34801	0.136704	0.318023	0.997	7816	tags=61%, list=40%, signal=101%
GOBP_CELL_CELL_SIGNALING_BY_WNT	498	0.359107	1.3477	0.107664	0.318225	0.997	7404	tags=44%, list=37%, signal=69%
GOBP_SERINE_FAMILY_AMINO_ACID_BIOSYNTHETIC_PROCESS	17	0.532677	1.34755	0.176147	0.318215	0.997	4196	tags=47%, list=21%, signal=60%
GOBP_ALDITOL_METABOLIC_PROCESS	22	0.464539	1.34753	0.129771	0.318002	0.997	6046	tags=41%, list=31%, signal=59%
GOBP_REGULATION_OF_CELL_SIZE	169	0.370132	1.34743	0.103203	0.317901	0.997	5908	tags=37%, list=30%, signal=53%
GOBP_POSITIVE_REGULATION_OF_BROWN_FAT_CELL_DIFFERENTIATION	16	0.503785	1.34742	0.150094	0.317667	0.997	4806	tags=38%, list=24%, signal=50%
GOBP_EXTRINSIC_APOPTOTIC_SIGNALING_PATHWAY	212	0.360362	1.34742	0.110714	0.317424	0.997	7255	tags=43%, list=37%, signal=67%
GOBP_GLYCEROPHOSPHOLIPID_METABOLIC_PROCESS	327	0.348595	1.34688	0.125664	0.317982	0.997	8423	tags=51%, list=43%, signal=88%
GOBP_CELLULAR_RESPONSE_TO_STEROID_HORMONE_STIMULUS	196	0.371076	1.34684	0.132841	0.317811	0.997	7724	tags=45%, list=39%, signal=74%
GOBP_POSITIVE_REGULATION_OF_ACTIN_FILAMENT_POLYMERIZATION	87	0.378593	1.34657	0.10536	0.31797	0.997	6352	tags=46%, list=32%, signal=67%
GOBP_DENDRITE_MORPHOGENESIS	135	0.385692	1.34641	0.123162	0.31797	0.997	8892	tags=58%, list=45%, signal=104%
GOBP_ESTABLISHMENT_OR_MAINTENANCE_OF_BIPOLAR_CELL_POLARITY	43	0.415076	1.34637	0.106422	0.317795	0.997	9903	tags=74%, list=50%, signal=149%
GOBP_NEGATIVE_REGULATION_OF_PROTEIN_LOCALIZATION_TO_CELL_PERIPHERY	24	0.468499	1.34557	0.159259	0.318735	0.997	4936	tags=42%, list=25%, signal=55%
GOBP_REGULATION_OF_ALPHA_BETA_T_CELL_ACTIVATION	98	0.442901	1.34452	0.231827	0.320029	0.997	6821	tags=51%, list=35%, signal=78%
GOBP_GLAND_DEVELOPMENT	410	0.329652	1.34419	0.0887372	0.320292	0.997	5469	tags=28%, list=28%, signal=38%
GOBP_RESPONSE_TO_GLUCAGON	37	0.396926	1.34413	0.127946	0.320123	0.997	6770	tags=41%, list=34%, signal=62%
GOBP_POSITIVE_REGULATION_OF_STRESS_ACTIVATED_PROTEIN_KINASE_SIGNALING_CASCADE	112	0.389334	1.34398	0.13852	0.320128	0.997	7970	tags=51%, list=40%, signal=85%
GOBP_REGULATION_OF_RECEPTOR_LOCALIZATION_TO_SYNAPSE	17	0.498953	1.34392	0.16451	0.319975	0.997	8518	tags=71%, list=43%, signal=124%
GOBP_NEURON_PROJECTION_EXTENSION	161	0.376905	1.34346	0.113309	0.320466	0.997	5817	tags=37%, list=29%, signal=52%
GOBP_POSITIVE_REGULATION_OF_CYTOKINE_PRODUCTION	414	0.366602	1.34291	0.171587	0.321039	0.997	7466	tags=44%, list=38%, signal=69%
GOBP_TRANSPOSITION	29	0.444489	1.34267	0.155477	0.32114	0.997	9682	tags=69%, list=49%, signal=135%
GOBP_MODULATION_BY_HOST_OF_VIRAL_GENOME_REPLICATION	16	0.519236	1.34263	0.138402	0.320966	0.997	6312	tags=56%, list=32%, signal=83%
GOBP_POSITIVE_REGULATION_OF_JNK_CASCADE	82	0.395308	1.3425	0.142329	0.320921	0.997	7403	tags=49%, list=37%, signal=78%
GOBP_POSITIVE_REGULATION_OF_AUTOPHAGY	117	0.414423	1.34242	0.150376	0.320792	0.997	7335	tags=52%, list=37%, signal=82%
GOBP_POSITIVE_REGULATION_OF_PATTERN_RECOGNITION_RECEPTOR_SIGNALING_PATHWAY	41	0.449272	1.34219	0.159223	0.320904	0.997	7449	tags=49%, list=38%, signal=78%
GOBP_REGULATION_OF_RECEPTOR_SIGNALING_PATHWAY_VIA_STAT	100	0.368362	1.34218	0.123214	0.320675	0.997	9400	tags=51%, list=48%, signal=97%
GOBP_VESICLE_ORGANIZATION	324	0.369518	1.3417	0.133455	0.321152	0.997	7809	tags=52%, list=40%, signal=84%
GOBP_CELL_CELL_ADHESION_MEDIATED_BY_INTEGRIN	16	0.547353	1.34135	0.177043	0.321437	0.997	5969	tags=75%, list=30%, signal=107%
GOBP_MITOCHONDRIAL_TRANSLATION	130	0.517813	1.34113	0.208333	0.32152	0.997	4576	tags=48%, list=23%, signal=63%
GOBP_RESPIRATORY_BURST	29	0.471529	1.34044	0.192748	0.322278	0.997	6675	tags=48%, list=34%, signal=73%
GOBP_ENDOPLASMIC_RETICULUM_TUBULAR_NETWORK_ORGANIZATION	17	0.540248	1.34041	0.17636	0.322088	0.997	6122	tags=65%, list=31%, signal=94%
GOBP_POSITIVE_REGULATION_OF_T_CELL_PROLIFERATION	96	0.446495	1.34036	0.236994	0.321938	0.997	7001	tags=56%, list=35%, signal=87%
GOBP_ALPHA_AMINO_ACID_BIOSYNTHETIC_PROCESS	62	0.409578	1.34015	0.130275	0.32201	0.997	5582	tags=40%, list=28%, signal=56%
GOBP_VITAMIN_METABOLIC_PROCESS	125	0.34501	1.33997	0.111293	0.322028	0.997	5311	tags=30%, list=27%, signal=40%
GOBP_POSITIVE_REGULATION_OF_ACTIN_NUCLEATION	15	0.538532	1.33967	0.145129	0.322164	0.997	5330	tags=60%, list=27%, signal=82%
GOBP_POSITIVE_REGULATION_OF_CHEMOKINE_PRODUCTION	58	0.43208	1.33927	0.164706	0.322496	0.997	4973	tags=31%, list=25%, signal=41%
GOBP_REGULATION_OF_EPIDERMAL_GROWTH_FACTOR_ACTIVATED_RECEPTOR_ACTIVITY	30	0.464775	1.33923	0.137476	0.322322	0.997	5007	tags=37%, list=25%, signal=49%
GOBP_REGULATION_OF_CELLULAR_AMINE_METABOLIC_PROCESS	75	0.438311	1.33886	0.19295	0.322636	0.997	5815	tags=40%, list=29%, signal=56%
GOBP_SUBSTRATE_DEPENDENT_CELL_MIGRATION	22	0.496766	1.33851	0.148936	0.322935	0.997	4566	tags=45%, list=23%, signal=59%
GOBP_CLATHRIN_DEPENDENT_ENDOCYTOSIS	46	0.448383	1.33825	0.184825	0.323056	0.997	6279	tags=54%, list=32%, signal=79%
GOBP_REGULATION_OF_LEUKOCYTE_APOPTOTIC_PROCESS	78	0.40744	1.33806	0.178236	0.323083	0.997	8839	tags=59%, list=45%, signal=106%
GOBP_POSITIVE_REGULATION_OF_PROTEIN_SERINE_THREONINE_KINASE_ACTIVITY	301	0.353446	1.33802	0.126812	0.322889	0.997	7541	tags=43%, list=38%, signal=69%
GOBP_NEGATIVE_REGULATION_OF_LYMPHOCYTE_ACTIVATION	145	0.401565	1.33774	0.196629	0.323057	0.997	9054	tags=61%, list=46%, signal=112%
GOBP_CEREBRAL_CORTEX_NEURON_DIFFERENTIATION	20	0.458329	1.33721	0.155009	0.323581	0.997	8323	tags=60%, list=42%, signal=104%
GOBP_POSITIVE_REGULATION_OF_LEUKOCYTE_CELL_CELL_ADHESION	227	0.422605	1.33692	0.217391	0.323808	0.997	7087	tags=52%, list=36%, signal=80%
GOBP_CYTOPLASMIC_TRANSLATION	99	0.477631	1.33685	0.241509	0.323669	0.997	6811	tags=52%, list=34%, signal=78%
GOBP_REGULATION_OF_NIK_NF_KAPPAB_SIGNALING	90	0.397717	1.3368	0.143667	0.323524	0.997	9664	tags=67%, list=49%, signal=130%
GOBP_COLUMNAR_CUBOIDAL_EPITHELIAL_CELL_DEVELOPMENT	36	0.415107	1.33652	0.111314	0.323671	0.997	5043	tags=33%, list=26%, signal=45%
GOBP_RESPONSE_TO_TUMOR_NECROSIS_FACTOR	300	0.356312	1.3363	0.149362	0.323709	0.997	7859	tags=46%, list=40%, signal=75%
GOBP_ENDOCYTIC_RECYCLING	46	0.448778	1.3363	0.13447	0.32347	0.997	6061	tags=50%, list=31%, signal=72%
GOBP_CELLULAR_KETONE_METABOLIC_PROCESS	239	0.33672	1.33598	0.106599	0.323723	0.997	5960	tags=33%, list=30%, signal=46%
GOBP_ALPHA_BETA_T_CELL_DIFFERENTIATION	106	0.425656	1.33545	0.208171	0.324309	0.997	7429	tags=55%, list=38%, signal=87%
GOBP_RESPONSE_TO_ANGIOTENSIN	23	0.464933	1.3351	0.115672	0.32457	0.997	4878	tags=48%, list=25%, signal=63%
GOBP_INSULIN_RECEPTOR_SIGNALING_PATHWAY	139	0.380933	1.3351	0.118959	0.324329	0.997	7465	tags=47%, list=38%, signal=75%
GOBP_HORMONE_MEDIATED_SIGNALING_PATHWAY	187	0.360466	1.335	0.123616	0.324225	0.997	7135	tags=40%, list=36%, signal=61%
GOBP_POSITIVE_REGULATION_OF_TOR_SIGNALING	39	0.428788	1.33495	0.144509	0.324056	0.997	6610	tags=46%, list=33%, signal=69%
GOBP_RESPONSE_TO_VITAMIN	88	0.370282	1.33491	0.135417	0.32388	0.997	5087	tags=28%, list=26%, signal=38%
GOBP_REGULATION_OF_BROWN_FAT_CELL_DIFFERENTIATION	22	0.474965	1.33461	0.153992	0.324107	0.997	4806	tags=36%, list=24%, signal=48%
GOBP_RESPONSE_TO_ACTIVITY	68	0.362785	1.3346	0.106961	0.323886	0.997	4162	tags=24%, list=21%, signal=30%
GOBP_REGULATION_OF_TRANSLATIONAL_ELONGATION	18	0.498747	1.33456	0.179924	0.32371	0.997	9090	tags=83%, list=46%, signal=154%
GOBP_RIBONUCLEOSIDE_TRIPHOSPHATE_BIOSYNTHETIC_PROCESS	49	0.393794	1.33408	0.141593	0.324163	0.997	4199	tags=33%, list=21%, signal=41%
GOBP_CELLULAR_RESPONSE_TO_STEROL	21	0.479091	1.33403	0.145957	0.324001	0.997	5017	tags=43%, list=25%, signal=57%
GOBP_RESPONSE_TO_INTERLEUKIN_1	195	0.366641	1.33396	0.15971	0.323849	0.997	9158	tags=54%, list=46%, signal=99%
GOBP_SELECTIVE_AUTOPHAGY	55	0.434695	1.33392	0.173752	0.323654	0.997	6448	tags=51%, list=33%, signal=75%
GOBP_GLYCEROLIPID_BIOSYNTHETIC_PROCESS	256	0.3452	1.3339	0.124113	0.323449	0.997	7245	tags=43%, list=37%, signal=68%
GOBP_RESPONSE_TO_TYPE_I_INTERFERON	98	0.427895	1.33388	0.193798	0.323228	0.997	8911	tags=59%, list=45%, signal=107%
GOBP_POSITIVE_REGULATION_OF_PROTEIN_LOCALIZATION_TO_MEMBRANE	123	0.371415	1.33385	0.121101	0.323052	0.997	6496	tags=45%, list=33%, signal=66%
GOBP_REGULATION_OF_HORMONE_METABOLIC_PROCESS	33	0.413917	1.33382	0.148746	0.322853	0.997	6498	tags=48%, list=33%, signal=72%
GOBP_POSITIVE_T_CELL_SELECTION	36	0.500714	1.33351	0.237817	0.323095	0.997	6471	tags=61%, list=33%, signal=91%
GOBP_PEPTIDYL_PROLINE_MODIFICATION	55	0.396273	1.33331	0.134579	0.32313	0.997	5897	tags=40%, list=30%, signal=57%
GOBP_ECTODERM_DEVELOPMENT	18	0.485442	1.33315	0.131179	0.323118	0.997	7440	tags=50%, list=38%, signal=80%
GOBP_POSITIVE_REGULATION_OF_NEUTROPHIL_MIGRATION	28	0.461583	1.33313	0.195817	0.322914	0.997	8607	tags=64%, list=44%, signal=114%
GOBP_REGULATION_OF_MICROTUBULE_DEPOLYMERIZATION	27	0.459125	1.33223	0.148008	0.324057	0.997	6569	tags=56%, list=33%, signal=83%
GOBP_OSTEOBLAST_PROLIFERATION	28	0.464068	1.33195	0.160149	0.324235	0.997	5653	tags=39%, list=29%, signal=55%
GOBP_CELLULAR_IRON_ION_HOMEOSTASIS	66	0.390599	1.33136	0.113971	0.324906	0.997	8186	tags=48%, list=41%, signal=83%
GOBP_AXON_EXTENSION	113	0.385307	1.3312	0.141071	0.324895	0.997	5774	tags=39%, list=29%, signal=55%
GOBP_PYROPTOSIS	17	0.521502	1.33074	0.19619	0.325358	0.997	7469	tags=65%, list=38%, signal=104%
GOBP_BRAIN_MORPHOGENESIS	34	0.420747	1.33038	0.139535	0.325597	0.997	10226	tags=65%, list=52%, signal=134%
GOBP_MITOTIC_CYTOKINETIC_PROCESS	23	0.487856	1.33033	0.171322	0.325422	0.997	7147	tags=65%, list=36%, signal=102%
GOBP_POSITIVE_REGULATION_OF_GRANULOCYTE_CHEMOTAXIS	26	0.462245	1.33024	0.18797	0.325316	0.997	8607	tags=65%, list=44%, signal=116%
GOBP_PHOSPHOLIPID_METABOLIC_PROCESS	388	0.338433	1.3296	0.119005	0.326002	0.997	8423	tags=50%, list=43%, signal=85%
GOBP_RESPONSE_TO_EXTRACELLULAR_STIMULUS	461	0.308842	1.32949	0.0686767	0.325917	0.997	6593	tags=33%, list=33%, signal=48%
GOBP_REGULATION_OF_CELL_CELL_ADHESION	414	0.381565	1.32949	0.181474	0.325688	0.997	7482	tags=48%, list=38%, signal=76%
GOBP_MEMBRANE_INVAGINATION	70	0.410994	1.32906	0.191729	0.326081	0.997	9392	tags=66%, list=48%, signal=125%
GOBP_REGULATION_OF_PROTEIN_TARGETING	79	0.378442	1.32755	0.132216	0.327994	0.997	7118	tags=47%, list=36%, signal=73%
GOBP_POSITIVE_REGULATION_OF_SIGNAL_TRANSDUCTION_BY_P53_CLASS_MEDIATOR	22	0.429151	1.32698	0.141264	0.328557	0.997	7593	tags=50%, list=38%, signal=81%
GOBP_CHAPERONE_MEDIATED_PROTEIN_COMPLEX_ASSEMBLY	22	0.491643	1.32671	0.178506	0.328701	0.997	3160	tags=36%, list=16%, signal=43%
GOBP_NEGATIVE_REGULATION_OF_REPRODUCTIVE_PROCESS	55	0.36092	1.32653	0.106383	0.328717	0.997	439	tags=9%, list=2%, signal=9%
GOBP_MODULATION_BY_HOST_OF_VIRAL_PROCESS	28	0.434146	1.32638	0.115028	0.328713	0.997	3092	tags=29%, list=16%, signal=34%
GOBP_POSITIVE_REGULATION_OF_B_CELL_MEDIATED_IMMUNITY	31	0.465754	1.3262	0.194831	0.328739	0.997	4415	tags=42%, list=22%, signal=54%
GOBP_INNER_MITOCHONDRIAL_MEMBRANE_ORGANIZATION	34	0.462752	1.32612	0.187023	0.328617	0.997	5859	tags=47%, list=30%, signal=67%
GOBP_REGULATION_OF_TORC1_SIGNALING	32	0.452944	1.32606	0.16763	0.328474	0.997	6025	tags=47%, list=31%, signal=67%
GOBP_REGULATION_OF_OXIDATIVE_PHOSPHORYLATION	21	0.470596	1.32557	0.160681	0.32895	0.997	4571	tags=33%, list=23%, signal=43%
GOBP_ACTIVATED_T_CELL_PROLIFERATION	43	0.43789	1.325	0.210227	0.329582	0.997	9271	tags=72%, list=47%, signal=136%
GOBP_POSITIVE_REGULATION_OF_CELL_MORPHOGENESIS_INVOLVED_IN_DIFFERENTIATION	76	0.386039	1.32496	0.146026	0.329426	0.997	5151	tags=36%, list=26%, signal=48%
GOBP_T_CELL_LINEAGE_COMMITMENT	27	0.477795	1.32474	0.211027	0.329481	0.997	6471	tags=56%, list=33%, signal=83%
GOBP_VESICLE_TARGETING_TO_FROM_OR_WITHIN_GOLGI	73	0.434564	1.32472	0.189036	0.32928	0.997	5451	tags=45%, list=28%, signal=62%
GOBP_NUCLEOSIDE_BISPHOSPHATE_BIOSYNTHETIC_PROCESS	64	0.40842	1.32471	0.136449	0.329066	0.997	8175	tags=61%, list=41%, signal=104%
GOBP_REGULATION_OF_TOLERANCE_INDUCTION	17	0.565722	1.32458	0.2	0.329004	0.997	4900	tags=53%, list=25%, signal=70%
GOBP_NADP_METABOLIC_PROCESS	33	0.439085	1.3245	0.146026	0.328906	0.997	4173	tags=33%, list=21%, signal=42%
GOBP_POSITIVE_REGULATION_OF_NEUROGENESIS	210	0.357255	1.32422	0.117754	0.329113	0.997	6161	tags=36%, list=31%, signal=51%
GOBP_PROTEIN_MATURATION	276	0.318108	1.32372	0.101639	0.329619	0.997	6768	tags=35%, list=34%, signal=52%
GOBP_NEGATIVE_REGULATION_OF_CELLULAR_PROTEIN_LOCALIZATION	109	0.377748	1.32361	0.143119	0.329573	0.997	5427	tags=36%, list=27%, signal=49%
GOBP_CELLULAR_RESPONSE_TO_EXTERNAL_STIMULUS	289	0.355616	1.32302	0.14032	0.330234	0.997	6707	tags=40%, list=34%, signal=59%
GOBP_POSITIVE_REGULATION_OF_IMMUNE_EFFECTOR_PROCESS	205	0.393446	1.32282	0.194231	0.330333	0.997	9322	tags=62%, list=47%, signal=116%
GOBP_FOREBRAIN_CELL_MIGRATION	51	0.400536	1.32255	0.136042	0.330487	0.997	7539	tags=43%, list=38%, signal=70%
GOBP_CELL_ADHESION_MEDIATED_BY_INTEGRIN	68	0.422934	1.32253	0.168224	0.330277	0.997	5969	tags=46%, list=30%, signal=65%
GOBP_REGULATION_OF_ACTIN_NUCLEATION	28	0.446088	1.32199	0.159615	0.330889	0.998	5330	tags=46%, list=27%, signal=63%
GOBP_RIBOSOME_ASSEMBLY	58	0.516101	1.32168	0.234733	0.331093	0.998	6627	tags=52%, list=34%, signal=78%
GOBP_CD4_POSITIVE_OR_CD8_POSITIVE_ALPHA_BETA_T_CELL_LINEAGE_COMMITMENT	22	0.509634	1.32087	0.204678	0.332061	0.998	6471	tags=59%, list=33%, signal=88%
GOBP_GTP_METABOLIC_PROCESS	22	0.468457	1.3208	0.160156	0.331933	0.998	5816	tags=45%, list=29%, signal=64%
GOBP_CELLULAR_CARBOHYDRATE_CATABOLIC_PROCESS	42	0.405646	1.32046	0.143627	0.33225	0.998	7234	tags=45%, list=37%, signal=71%
GOBP_INTRINSIC_APOPTOTIC_SIGNALING_PATHWAY_IN_RESPONSE_TO_ENDOPLASMIC_RETICULUM_STRESS	57	0.390155	1.32017	0.16065	0.332434	0.998	6374	tags=40%, list=32%, signal=59%
GOBP_ADIPOSE_TISSUE_DEVELOPMENT	35	0.423243	1.31999	0.161793	0.332478	0.998	5546	tags=37%, list=28%, signal=52%
GOBP_VENTRICULAR_SYSTEM_DEVELOPMENT	27	0.441035	1.31977	0.150735	0.332577	0.998	2948	tags=30%, list=15%, signal=35%
GOBP_POSITIVE_REGULATION_OF_PROTEIN_DEPHOSPHORYLATION	44	0.413295	1.31968	0.168498	0.332474	0.998	4936	tags=39%, list=25%, signal=51%
GOBP_ACETYL_COA_BIOSYNTHETIC_PROCESS	22	0.492459	1.31922	0.171322	0.332904	0.998	4861	tags=50%, list=25%, signal=66%
GOBP_NEGATIVE_REGULATION_OF_FIBROBLAST_PROLIFERATION	30	0.429573	1.31853	0.142582	0.333717	0.998	8967	tags=77%, list=45%, signal=140%
GOBP_MEGAKARYOCYTE_DEVELOPMENT	15	0.523933	1.31744	0.181644	0.335132	0.998	5424	tags=47%, list=27%, signal=64%
GOBP_NUCLEOSIDE_TRIPHOSPHATE_BIOSYNTHETIC_PROCESS	60	0.394607	1.31743	0.146568	0.334916	0.998	6488	tags=43%, list=33%, signal=64%
GOBP_REGULATION_OF_T_CELL_MIGRATION	41	0.446362	1.31682	0.180608	0.335601	0.998	6768	tags=49%, list=34%, signal=74%
GOBP_WALKING_BEHAVIOR	25	0.424747	1.31659	0.134545	0.335716	0.998	6241	tags=40%, list=32%, signal=58%
GOBP_NEGATIVE_REGULATION_OF_CARBOHYDRATE_METABOLIC_PROCESS	45	0.378249	1.31602	0.121101	0.336314	0.998	8120	tags=51%, list=41%, signal=87%
GOBP_MALE_SEX_DIFFERENTIATION	150	0.333785	1.31572	0.12709	0.336524	0.998	7674	tags=39%, list=39%, signal=63%
GOBP_REGULATION_OF_B_CELL_DIFFERENTIATION	29	0.516476	1.31569	0.228866	0.336346	0.998	5424	tags=52%, list=27%, signal=71%
GOBP_REGULATION_OF_SMOOTHENED_SIGNALING_PATHWAY	72	0.434874	1.3156	0.189944	0.336246	0.998	8172	tags=57%, list=41%, signal=97%
GOBP_ANATOMICAL_STRUCTURE_MATURATION	206	0.317895	1.31493	0.104631	0.337017	0.998	4934	tags=23%, list=25%, signal=30%
GOBP_HIPPO_SIGNALING	46	0.468999	1.31417	0.218924	0.337964	0.998	3969	tags=37%, list=20%, signal=46%
GOBP_RIBOSOMAL_LARGE_SUBUNIT_ASSEMBLY	26	0.573823	1.31404	0.260377	0.337929	0.998	6627	tags=62%, list=34%, signal=92%
GOBP_CELLULAR_RESPONSE_TO_PROSTAGLANDIN_E_STIMULUS	15	0.528594	1.31372	0.154599	0.338181	0.998	4162	tags=47%, list=21%, signal=59%
GOBP_REGULATION_OF_CLATHRIN_DEPENDENT_ENDOCYTOSIS	19	0.498899	1.31336	0.15625	0.338523	0.998	6705	tags=58%, list=34%, signal=88%
GOBP_ACTIN_FILAMENT_BASED_TRANSPORT	21	0.496299	1.31297	0.167331	0.338864	0.998	7425	tags=67%, list=38%, signal=107%
GOBP_ANTERIOR_POSTERIOR_AXIS_SPECIFICATION	47	0.368526	1.31222	0.12234	0.339768	0.998	6040	tags=32%, list=31%, signal=46%
GOBP_RESPONSE_TO_SALT_STRESS	26	0.410432	1.31194	0.175943	0.339932	0.998	5632	tags=35%, list=29%, signal=48%
GOBP_REGULATION_OF_CD4_POSITIVE_ALPHA_BETA_T_CELL_DIFFERENTIATION	50	0.472595	1.31193	0.230924	0.339704	0.998	6809	tags=56%, list=34%, signal=85%
GOBP_NADPH_REGENERATION	17	0.507243	1.31168	0.197782	0.339842	0.998	6794	tags=59%, list=34%, signal=90%
GOBP_POSITIVE_REGULATION_OF_PROTEIN_BINDING	81	0.38032	1.31152	0.130841	0.339819	0.998	3963	tags=32%, list=20%, signal=40%
GOBP_GANGLION_DEVELOPMENT	16	0.492425	1.31137	0.167883	0.339813	0.998	3884	tags=38%, list=20%, signal=47%
GOBP_POSITIVE_REGULATION_OF_INTERLEUKIN_12_PRODUCTION	40	0.47115	1.31094	0.218	0.340224	0.998	7466	tags=60%, list=38%, signal=96%
GOBP_REGULATION_OF_LIPOPROTEIN_PARTICLE_CLEARANCE	18	0.444599	1.31055	0.136622	0.340646	0.998	4447	tags=28%, list=23%, signal=36%
GOBP_MEMBRANE_PROTEIN_ECTODOMAIN_PROTEOLYSIS	41	0.430626	1.31037	0.183178	0.340677	0.998	7555	tags=51%, list=38%, signal=83%
GOBP_REGULATION_OF_LYMPHOCYTE_CHEMOTAXIS	26	0.460077	1.31029	0.162011	0.340596	0.998	6682	tags=50%, list=34%, signal=75%
GOBP_TELENCEPHALON_GLIAL_CELL_MIGRATION	20	0.470153	1.31012	0.186813	0.340594	0.998	7539	tags=55%, list=38%, signal=89%
GOBP_RESPONSE_TO_FATTY_ACID	59	0.364303	1.31012	0.138053	0.340357	0.998	4052	tags=24%, list=21%, signal=30%
GOBP_VESICLE_BUDDING_FROM_MEMBRANE	106	0.40694	1.30992	0.184701	0.340433	0.998	7147	tags=54%, list=36%, signal=84%
GOBP_POSTSYNAPSE_ORGANIZATION	156	0.352993	1.30982	0.121693	0.340342	0.998	5836	tags=33%, list=30%, signal=46%
GOBP_EXTRACELLULAR_VESICLE_BIOGENESIS	21	0.464535	1.30974	0.163934	0.34023	0.998	7370	tags=62%, list=37%, signal=99%
GOBP_ACETYL_COA_METABOLIC_PROCESS	38	0.429422	1.3097	0.163004	0.340062	0.998	4861	tags=42%, list=25%, signal=56%
GOBP_REGULATION_OF_GLIAL_CELL_PROLIFERATION	29	0.420895	1.30932	0.144465	0.340444	0.998	6113	tags=45%, list=31%, signal=65%
GOBP_REGULATION_OF_WNT_SIGNALING_PATHWAY	350	0.345796	1.30923	0.120939	0.340326	0.998	6175	tags=36%, list=31%, signal=52%
GOBP_REGULATION_OF_ANDROGEN_RECEPTOR_SIGNALING_PATHWAY	25	0.478052	1.30913	0.147638	0.340232	0.998	7547	tags=60%, list=38%, signal=97%
GOBP_RESPONSE_TO_CAFFEINE	17	0.49677	1.30912	0.175373	0.339999	0.998	2945	tags=29%, list=15%, signal=35%
GOBP_REGULATION_OF_EPIDERMIS_DEVELOPMENT	64	0.379303	1.30864	0.155515	0.340448	0.998	6515	tags=41%, list=33%, signal=60%
GOBP_CELL_MATURATION	157	0.315187	1.30862	0.11453	0.340235	0.998	3458	tags=17%, list=18%, signal=20%
GOBP_REGULATION_OF_EXTRINSIC_APOPTOTIC_SIGNALING_PATHWAY	150	0.353764	1.30857	0.143363	0.340077	0.998	7255	tags=43%, list=37%, signal=68%
GOBP_T_CELL_PROLIFERATION	188	0.395346	1.30693	0.233716	0.342278	0.998	8216	tags=57%, list=42%, signal=97%
GOBP_NEGATIVE_REGULATION_OF_PROTEIN_LOCALIZATION_TO_MEMBRANE	30	0.430536	1.30638	0.141777	0.342871	0.998	5086	tags=37%, list=26%, signal=49%
GOBP_REGULATION_OF_B_CELL_ACTIVATION	114	0.414285	1.306	0.230019	0.343233	0.998	7482	tags=54%, list=38%, signal=87%
GOBP_CANONICAL_WNT_SIGNALING_PATHWAY	321	0.346291	1.30567	0.119349	0.343506	0.998	6750	tags=39%, list=34%, signal=59%
GOBP_NEGATIVE_REGULATION_OF_B_CELL_ACTIVATION	33	0.48433	1.30546	0.204365	0.343605	0.998	7482	tags=67%, list=38%, signal=107%
GOBP_EMBRYONIC_CAMERA_TYPE_EYE_DEVELOPMENT	33	0.431279	1.30545	0.168784	0.34338	0.998	5750	tags=45%, list=29%, signal=64%
GOBP_REGULATION_OF_CELL_MORPHOGENESIS_INVOLVED_IN_DIFFERENTIATION	90	0.378178	1.30526	0.152015	0.343443	0.998	4845	tags=33%, list=25%, signal=44%
GOBP_REGULATION_OF_NEUROGENESIS	335	0.340764	1.30522	0.133929	0.343289	0.998	6161	tags=34%, list=31%, signal=49%
GOBP_RESPONSE_TO_MITOCHONDRIAL_DEPOLARISATION	18	0.503912	1.30497	0.208171	0.343418	0.998	6043	tags=44%, list=31%, signal=64%
GOBP_IRON_ION_HOMEOSTASIS	81	0.369603	1.30493	0.136861	0.343239	0.998	8186	tags=46%, list=41%, signal=78%
GOBP_SOMITE_DEVELOPMENT	83	0.369469	1.30482	0.144578	0.343176	0.998	5833	tags=35%, list=30%, signal=49%
GOBP_PROTEIN_QUALITY_CONTROL_FOR_MISFOLDED_OR_INCOMPLETELY_SYNTHESIZED_PROTEINS	27	0.490834	1.30453	0.197719	0.3434	0.998	5180	tags=52%, list=26%, signal=70%
GOBP_REGULATION_OF_VIRAL_TRANSCRIPTION	42	0.431182	1.30424	0.180791	0.343612	0.998	2874	tags=29%, list=15%, signal=33%
GOBP_MESODERM_DEVELOPMENT	116	0.355788	1.30394	0.141324	0.343837	0.998	7880	tags=45%, list=40%, signal=74%
GOBP_NEGATIVE_REGULATION_OF_T_HELPER_CELL_DIFFERENTIATION	18	0.505034	1.30378	0.210526	0.343853	0.998	6362	tags=56%, list=32%, signal=82%
GOBP_ALPHA_BETA_T_CELL_ACTIVATION	146	0.407939	1.30368	0.242661	0.343769	0.998	7487	tags=52%, list=38%, signal=83%
GOBP_PROTEIN_LOCALIZATION_TO_CELL_JUNCTION	105	0.370963	1.30354	0.151079	0.343745	0.998	8613	tags=54%, list=44%, signal=96%
GOBP_POSITIVE_REGULATION_OF_JUN_KINASE_ACTIVITY	64	0.416431	1.3033	0.184158	0.343885	0.998	9720	tags=72%, list=49%, signal=141%
GOBP_DE_NOVO_PROTEIN_FOLDING	38	0.438955	1.30323	0.186567	0.343746	0.998	4882	tags=37%, list=25%, signal=49%
GOBP_POSITIVE_REGULATION_OF_CELLULAR_RESPONSE_TO_TRANSFORMING_GROWTH_FACTOR_BETA_STIMULUS	27	0.442314	1.30305	0.181985	0.343782	0.998	5309	tags=44%, list=27%, signal=61%
GOBP_INOSITOL_PHOSPHATE_CATABOLIC_PROCESS	17	0.474334	1.30285	0.163107	0.343844	0.998	8173	tags=71%, list=41%, signal=120%
GOBP_POSITIVE_REGULATION_OF_LYMPHOCYTE_CHEMOTAXIS	20	0.463401	1.30282	0.18097	0.343661	0.998	6682	tags=50%, list=34%, signal=75%
GOBP_ANOIKIS	33	0.420802	1.30278	0.150735	0.343487	0.998	5604	tags=42%, list=28%, signal=59%
GOBP_CELLULAR_RESPONSE_TO_EXTRACELLULAR_STIMULUS	222	0.346609	1.30247	0.153025	0.343772	0.998	6593	tags=39%, list=33%, signal=58%
GOBP_LIPOPROTEIN_BIOSYNTHETIC_PROCESS	92	0.373113	1.30218	0.161002	0.343979	0.998	7927	tags=51%, list=40%, signal=85%
GOBP_REGULATION_OF_CELLULAR_AMINO_ACID_METABOLIC_PROCESS	61	0.466965	1.30211	0.232075	0.343838	0.998	5815	tags=44%, list=29%, signal=63%
GOBP_POSITIVE_REGULATION_OF_VIRAL_LIFE_CYCLE	32	0.426134	1.30158	0.170686	0.344366	0.998	6796	tags=50%, list=34%, signal=76%
GOBP_POSITIVE_REGULATION_OF_VIRAL_TRANSCRIPTION	26	0.481246	1.30111	0.181992	0.344847	0.998	2664	tags=31%, list=13%, signal=36%
GOBP_NEGATIVE_REGULATION_OF_CANONICAL_WNT_SIGNALING_PATHWAY	172	0.347932	1.30092	0.140625	0.344889	0.998	5017	tags=30%, list=25%, signal=40%
GOBP_POSITIVE_REGULATION_OF_DENDRITIC_SPINE_DEVELOPMENT	40	0.433042	1.3008	0.182674	0.344867	0.998	8822	tags=68%, list=45%, signal=122%
GOBP_I_KAPPAB_KINASE_NF_KAPPAB_SIGNALING	270	0.376131	1.30068	0.168605	0.344832	0.998	9091	tags=59%, list=46%, signal=108%
GOBP_NEURAL_NUCLEUS_DEVELOPMENT	57	0.37358	1.29939	0.161765	0.346483	0.998	4041	tags=28%, list=20%, signal=35%
GOBP_POSITIVE_REGULATION_OF_CELL_CELL_ADHESION	267	0.394371	1.29937	0.229287	0.346286	0.998	7009	tags=48%, list=35%, signal=74%
GOBP_REGULATION_OF_CD8_POSITIVE_ALPHA_BETA_T_CELL_ACTIVATION	18	0.533053	1.29923	0.222445	0.346267	0.998	5129	tags=50%, list=26%, signal=67%
GOBP_STEROID_BIOSYNTHETIC_PROCESS	180	0.321187	1.29917	0.14966	0.346113	0.998	5989	tags=31%, list=30%, signal=44%
GOBP_RESPONSE_TO_OXYGEN_LEVELS	366	0.325492	1.29853	0.136678	0.346786	0.998	5539	tags=31%, list=28%, signal=42%
GOBP_FORMATION_OF_CYTOPLASMIC_TRANSLATION_INITIATION_COMPLEX	16	0.575198	1.29818	0.241187	0.347058	0.998	5724	tags=69%, list=29%, signal=97%
GOBP_CORTICAL_CYTOSKELETON_ORGANIZATION	58	0.411217	1.29781	0.17636	0.347395	0.998	7647	tags=53%, list=39%, signal=87%
GOBP_PLACENTA_BLOOD_VESSEL_DEVELOPMENT	27	0.459118	1.2978	0.192884	0.347171	0.998	6232	tags=52%, list=32%, signal=76%
GOBP_CELLULAR_RESPONSE_TO_MOLECULE_OF_BACTERIAL_ORIGIN	194	0.375835	1.29741	0.183521	0.347494	0.998	7638	tags=44%, list=39%, signal=71%
GOBP_POSITIVE_REGULATION_OF_PEPTIDYL_THREONINE_PHOSPHORYLATION	30	0.429861	1.2974	0.146691	0.347281	0.998	8016	tags=43%, list=41%, signal=73%
GOBP_DEVELOPMENTAL_CELL_GROWTH	210	0.35479	1.29709	0.168142	0.347503	0.998	5826	tags=34%, list=29%, signal=47%
GOBP_REGULATION_OF_T_HELPER_CELL_DIFFERENTIATION	38	0.463427	1.29702	0.232692	0.347377	0.998	6809	tags=55%, list=34%, signal=84%
GOBP_GLYCINE_METABOLIC_PROCESS	15	0.50647	1.2969	0.162011	0.347301	0.998	1203	tags=27%, list=6%, signal=28%
GOBP_NEGATIVE_REGULATION_OF_ERBB_SIGNALING_PATHWAY	51	0.436761	1.2958	0.193858	0.348713	0.998	4541	tags=31%, list=23%, signal=41%
GOBP_B_CELL_MEDIATED_IMMUNITY	112	0.398242	1.29554	0.224953	0.348872	0.998	7482	tags=47%, list=38%, signal=76%
GOBP_RECEPTOR_SIGNALING_PATHWAY_VIA_STAT	162	0.354185	1.29458	0.178182	0.350066	0.998	8521	tags=48%, list=43%, signal=83%
GOBP_RESPONSE_TO_STEROL_DEPLETION	16	0.541237	1.29384	0.216797	0.350969	0.998	6493	tags=69%, list=33%, signal=102%
GOBP_REGULATION_OF_DEVELOPMENTAL_GROWTH	297	0.336526	1.29308	0.149565	0.351914	0.998	5890	tags=31%, list=30%, signal=43%
GOBP_REGULATION_OF_PRODUCTION_OF_MOLECULAR_MEDIATOR_OF_IMMUNE_RESPONSE	139	0.377018	1.29299	0.193916	0.351804	0.998	7607	tags=45%, list=39%, signal=73%
GOBP_RESPONSE_TO_ESTRADIOL	122	0.337006	1.29275	0.136678	0.351926	0.998	3619	tags=20%, list=18%, signal=25%
GOBP_POSITIVE_REGULATION_OF_AMYLOID_PRECURSOR_PROTEIN_CATABOLIC_PROCESS	22	0.456695	1.29261	0.173828	0.351915	0.998	5226	tags=45%, list=26%, signal=62%
GOBP_MRNA_TRANSCRIPTION	15	0.480937	1.29166	0.184825	0.353105	0.998	8567	tags=80%, list=43%, signal=141%
GOBP_REGULATION_OF_AUTOPHAGY_OF_MITOCHONDRION	29	0.478722	1.29095	0.179191	0.353937	0.998	8655	tags=79%, list=44%, signal=141%
GOBP_REGULATION_OF_RESPONSE_TO_TUMOR_CELL	16	0.499663	1.29093	0.218876	0.353721	0.998	4195	tags=38%, list=21%, signal=48%
GOBP_REGULATION_OF_MITOCHONDRIAL_MEMBRANE_POTENTIAL	63	0.375395	1.2909	0.164875	0.353528	0.998	9257	tags=56%, list=47%, signal=104%
GOBP_POSITIVE_REGULATION_OF_LEUKOCYTE_MEDIATED_IMMUNITY	115	0.407993	1.29077	0.23062	0.353486	0.998	9322	tags=68%, list=47%, signal=128%
GOBP_OLFACTORY_LOBE_DEVELOPMENT	28	0.434847	1.29067	0.175862	0.353411	0.998	7571	tags=43%, list=38%, signal=69%
GOBP_VIRAL_GENE_EXPRESSION	195	0.453642	1.29064	0.262664	0.353223	0.998	7116	tags=48%, list=36%, signal=74%
GOBP_ADAPTIVE_IMMUNE_RESPONSE	400	0.390443	1.28993	0.267176	0.354073	0.998	9284	tags=63%, list=47%, signal=116%
GOBP_RESPONSE_TO_PROSTAGLANDIN_E	23	0.448168	1.28869	0.178082	0.355699	0.999	6459	tags=48%, list=33%, signal=71%
GOBP_AUTOPHAGOSOME_ORGANIZATION	94	0.414433	1.28841	0.204159	0.355903	0.999	7303	tags=53%, list=37%, signal=84%
GOBP_REGULATION_OF_IMMUNE_EFFECTOR_PROCESS	382	0.366576	1.28839	0.20983	0.355699	0.999	9383	tags=57%, list=47%, signal=107%
GOBP_DEVELOPMENTAL_MATURATION	255	0.309056	1.28839	0.117547	0.355471	0.999	6263	tags=28%, list=32%, signal=40%
GOBP_CYTOPLASMIC_SEQUESTERING_OF_PROTEIN	22	0.459791	1.28807	0.173004	0.35573	0.999	5340	tags=45%, list=27%, signal=62%
GOBP_REGULATION_OF_POSTSYNAPTIC_MEMBRANE_NEUROTRANSMITTER_RECEPTOR_LEVELS	57	0.388196	1.28798	0.162113	0.355643	0.999	7078	tags=40%, list=36%, signal=63%
GOBP_POSITIVE_REGULATION_OF_DENDRITE_MORPHOGENESIS	34	0.426789	1.28798	0.175573	0.35541	0.999	4402	tags=35%, list=22%, signal=45%
GOBP_REGULATION_OF_TRANSCRIPTION_REGULATORY_REGION_DNA_BINDING	49	0.365858	1.28754	0.158082	0.355847	0.999	7653	tags=45%, list=39%, signal=73%
GOBP_STEM_CELL_PROLIFERATION	60	0.384954	1.28744	0.16791	0.355776	0.999	6011	tags=35%, list=30%, signal=50%
GOBP_LYMPHOCYTE_MEDIATED_IMMUNITY	240	0.390022	1.28699	0.242366	0.356251	0.999	9364	tags=63%, list=47%, signal=119%
GOBP_NEGATIVE_REGULATION_OF_MYELOID_LEUKOCYTE_DIFFERENTIATION	47	0.394954	1.28662	0.181989	0.356586	0.999	9428	tags=55%, list=48%, signal=106%
GOBP_REGULATION_OF_LIPID_KINASE_ACTIVITY	65	0.423777	1.28656	0.199616	0.356472	0.999	5831	tags=40%, list=30%, signal=57%
GOBP_TOXIN_TRANSPORT	39	0.40965	1.28655	0.170642	0.356247	0.999	5492	tags=44%, list=28%, signal=60%
GOBP_RETINOIC_ACID_RECEPTOR_SIGNALING_PATHWAY	32	0.412012	1.28626	0.165766	0.356393	0.999	6522	tags=41%, list=33%, signal=61%
GOBP_POSITIVE_REGULATION_OF_ANTIGEN_RECEPTOR_MEDIATED_SIGNALING_PATHWAY	20	0.481172	1.28559	0.243299	0.357162	0.999	5690	tags=55%, list=29%, signal=77%
GOBP_AMINO_SUGAR_METABOLIC_PROCESS	39	0.39559	1.28533	0.17033	0.357355	0.999	8674	tags=46%, list=44%, signal=82%
GOBP_REGULATION_OF_CELLULAR_COMPONENT_SIZE	350	0.340307	1.28522	0.155235	0.357275	0.999	8274	tags=49%, list=42%, signal=83%
GOBP_NEGATIVE_REGULATION_OF_PROTEIN_CONTAINING_COMPLEX_DISASSEMBLY	73	0.41122	1.28512	0.198488	0.35719	0.999	6569	tags=47%, list=33%, signal=70%
GOBP_ONE_CARBON_METABOLIC_PROCESS	38	0.380587	1.28495	0.159664	0.35719	0.999	5277	tags=34%, list=27%, signal=47%
GOBP_TRNA_WOBBLE_BASE_MODIFICATION	18	0.498712	1.2846	0.199226	0.357477	0.999	8094	tags=67%, list=41%, signal=113%
GOBP_POSITIVE_REGULATION_OF_CYTOSKELETON_ORGANIZATION	207	0.35332	1.28438	0.150838	0.357615	0.999	6401	tags=42%, list=32%, signal=61%
GOBP_WNT_SIGNALING_PATHWAY_CALCIUM_MODULATING_PATHWAY	38	0.437733	1.28423	0.201149	0.357598	0.999	7317	tags=58%, list=37%, signal=92%
GOBP_POSITIVE_REGULATION_OF_PRODUCTION_OF_MOLECULAR_MEDIATOR_OF_IMMUNE_RESPONSE	93	0.384411	1.2832	0.208015	0.358917	0.999	7188	tags=41%, list=36%, signal=64%
GOBP_AXIS_SPECIFICATION	80	0.34949	1.28303	0.148148	0.358981	0.999	6040	tags=33%, list=31%, signal=47%
GOBP_VITAMIN_TRANSMEMBRANE_TRANSPORT	17	0.457653	1.28261	0.164557	0.359401	0.999	1446	tags=24%, list=7%, signal=25%
GOBP_REGULATION_OF_B_CELL_APOPTOTIC_PROCESS	18	0.472218	1.28229	0.212181	0.359656	0.999	9054	tags=78%, list=46%, signal=143%
GOBP_REGULATION_OF_TRANSCRIPTION_FROM_RNA_POLYMERASE_II_PROMOTER_IN_RESPONSE_TO_HYPOXIA	75	0.427271	1.28211	0.221805	0.359722	0.999	5833	tags=44%, list=30%, signal=62%
GOBP_POSITIVE_REGULATION_OF_I_KAPPAB_KINASE_NF_KAPPAB_SIGNALING	179	0.378276	1.28205	0.200378	0.359593	0.999	9091	tags=59%, list=46%, signal=108%
GOBP_COCHLEA_MORPHOGENESIS	22	0.407378	1.28204	0.165837	0.359361	0.999	6248	tags=32%, list=32%, signal=46%
GOBP_ANTIGEN_PROCESSING_AND_PRESENTATION_OF_EXOGENOUS_PEPTIDE_ANTIGEN_VIA_MHC_CLASS_I	79	0.462506	1.2817	0.226562	0.359714	0.999	7713	tags=57%, list=39%, signal=93%
GOBP_CERAMIDE_METABOLIC_PROCESS	94	0.341733	1.2817	0.155979	0.359487	0.999	7223	tags=39%, list=37%, signal=62%
GOBP_DEOXYRIBOSE_PHOSPHATE_CATABOLIC_PROCESS	26	0.431852	1.28147	0.199623	0.359603	0.999	4173	tags=31%, list=21%, signal=39%
GOBP_POSITIVE_REGULATION_OF_MYELOID_LEUKOCYTE_CYTOKINE_PRODUCTION_INVOLVED_IN_IMMUNE_RESPONSE	16	0.514286	1.28122	0.220729	0.359751	0.999	6387	tags=56%, list=32%, signal=83%
GOBP_NEGATIVE_REGULATION_OF_INNATE_IMMUNE_RESPONSE	62	0.415327	1.28065	0.215213	0.360384	0.999	5179	tags=37%, list=26%, signal=50%
GOBP_CELL_CELL_RECOGNITION	79	0.327224	1.28014	0.169106	0.360926	0.999	4189	tags=20%, list=21%, signal=26%
GOBP_REGULATION_OF_LEUKOCYTE_MEDIATED_IMMUNITY	198	0.395565	1.28013	0.229287	0.360716	0.999	9364	tags=65%, list=47%, signal=122%
GOBP_APICAL_JUNCTION_ASSEMBLY	81	0.361697	1.28013	0.160714	0.360485	0.999	5805	tags=32%, list=29%, signal=45%
GOBP_NEGATIVE_REGULATION_OF_LYMPHOCYTE_APOPTOTIC_PROCESS	30	0.426081	1.28003	0.169145	0.360396	0.999	8839	tags=60%, list=45%, signal=108%
GOBP_CELL_REDOX_HOMEOSTASIS	40	0.39912	1.27973	0.195612	0.360645	0.999	4843	tags=33%, list=25%, signal=43%
GOBP_POSITIVE_REGULATION_OF_CELL_ACTIVATION	320	0.378617	1.27953	0.240987	0.360705	0.999	7473	tags=48%, list=38%, signal=76%
GOBP_REGULATION_OF_VACUOLE_ORGANIZATION	47	0.422655	1.27933	0.203358	0.360788	0.999	8770	tags=64%, list=44%, signal=115%
GOBP_NEGATIVE_REGULATION_OF_HYDROLASE_ACTIVITY	423	0.294961	1.27895	0.107317	0.361165	0.999	4821	tags=22%, list=24%, signal=29%
GOBP_RESPONSE_TO_ACID_CHEMICAL	111	0.338906	1.2787	0.167539	0.361246	0.999	6593	tags=32%, list=33%, signal=48%
GOBP_REGULATION_OF_TOLL_LIKE_RECEPTOR_4_SIGNALING_PATHWAY	21	0.478581	1.27796	0.197628	0.362145	1	3904	tags=33%, list=20%, signal=41%
GOBP_VASCULAR_ENDOTHELIAL_GROWTH_FACTOR_RECEPTOR_SIGNALING_PATHWAY	88	0.400093	1.27736	0.215238	0.362807	1	6047	tags=42%, list=31%, signal=60%
GOBP_REGULATION_OF_ENDOCYTOSIS	198	0.338766	1.27723	0.186257	0.36274	1	7374	tags=43%, list=37%, signal=69%
GOBP_ACTIVATION_OF_MAPKK_ACTIVITY	49	0.432363	1.27721	0.229412	0.362534	1	7695	tags=57%, list=39%, signal=93%
GOBP_ENDOCRINE_PANCREAS_DEVELOPMENT	45	0.372565	1.27696	0.155203	0.362677	1	9208	tags=58%, list=47%, signal=108%
GOBP_REGULATION_OF_RECEPTOR_MEDIATED_ENDOCYTOSIS	99	0.345943	1.27642	0.166362	0.363255	1	6906	tags=40%, list=35%, signal=62%
GOBP_REGULATION_OF_LYMPHOCYTE_MIGRATION	61	0.405832	1.2756	0.220994	0.364249	1	6768	tags=44%, list=34%, signal=67%
GOBP_NEGATIVE_REGULATION_OF_PROTEIN_KINASE_B_SIGNALING	44	0.390753	1.27519	0.18854	0.364646	1	7890	tags=57%, list=40%, signal=94%
GOBP_ESTABLISHMENT_OF_TISSUE_POLARITY	122	0.372278	1.27474	0.192101	0.365067	1	8705	tags=55%, list=44%, signal=98%
GOBP_REGULATION_OF_LIPID_BIOSYNTHETIC_PROCESS	188	0.321559	1.27461	0.150685	0.365045	1	6574	tags=34%, list=33%, signal=50%
GOBP_ANTIGEN_PROCESSING_AND_PRESENTATION_OF_PEPTIDE_ANTIGEN_VIA_MHC_CLASS_I	98	0.429374	1.27454	0.233397	0.364927	1	7713	tags=54%, list=39%, signal=88%
GOBP_COLUMNAR_CUBOIDAL_EPITHELIAL_CELL_DIFFERENTIATION	78	0.341503	1.27438	0.173267	0.364937	1	9532	tags=55%, list=48%, signal=106%
GOBP_NEUROBLAST_PROLIFERATION	52	0.401488	1.27434	0.175238	0.36477	1	7788	tags=44%, list=39%, signal=73%
GOBP_GRANULOCYTE_DIFFERENTIATION	33	0.400018	1.27402	0.195896	0.365002	1	7910	tags=48%, list=40%, signal=81%
GOBP_MAMMARY_GLAND_DEVELOPMENT	129	0.337961	1.27338	0.175958	0.365783	1	5624	tags=29%, list=28%, signal=41%
GOBP_CELL_PROLIFERATION_IN_FOREBRAIN	25	0.427916	1.27332	0.208481	0.365643	1	7130	tags=40%, list=36%, signal=63%
GOBP_REGULATION_OF_NEURON_PROJECTION_ARBORIZATION	15	0.475025	1.27325	0.183365	0.365519	1	8012	tags=60%, list=41%, signal=101%
GOBP_INTRACELLULAR_LIPID_TRANSPORT	42	0.401561	1.27285	0.200743	0.365894	1	6241	tags=48%, list=32%, signal=69%
GOBP_REGULATION_OF_B_CELL_MEDIATED_IMMUNITY	47	0.431016	1.27269	0.243513	0.365902	1	9259	tags=70%, list=47%, signal=132%
GOBP_RESPONSE_TO_STEROID_HORMONE	324	0.317547	1.27076	0.141869	0.368591	1	7337	tags=35%, list=37%, signal=56%
GOBP_INFLAMMATORY_CELL_APOPTOTIC_PROCESS	19	0.445006	1.27074	0.195489	0.368391	1	7181	tags=47%, list=36%, signal=74%
GOBP_RESPONSE_TO_FIBROBLAST_GROWTH_FACTOR	137	0.340621	1.27028	0.165187	0.368812	1	2721	tags=19%, list=14%, signal=22%
GOBP_NEGATIVE_REGULATION_OF_PRODUCTION_OF_MIRNAS_INVOLVED_IN_GENE_SILENCING_BY_MIRNA	15	0.487116	1.27022	0.159004	0.368655	1	9558	tags=73%, list=48%, signal=142%
GOBP_VESICLE_CARGO_LOADING	26	0.468324	1.27001	0.236994	0.368745	1	9077	tags=77%, list=46%, signal=142%
GOBP_NEGATIVE_REGULATION_OF_TUMOR_NECROSIS_FACTOR_MEDIATED_SIGNALING_PATHWAY	19	0.429024	1.26988	0.183908	0.368715	1	2875	tags=21%, list=15%, signal=25%
GOBP_REGULATION_OF_MAST_CELL_ACTIVATION_INVOLVED_IN_IMMUNE_RESPONSE	29	0.430486	1.26977	0.210728	0.368645	1	6143	tags=48%, list=31%, signal=70%
GOBP_POSITIVE_REGULATION_OF_GLUCOSE_IMPORT	35	0.421809	1.26951	0.202925	0.368797	1	4844	tags=34%, list=25%, signal=45%
GOBP_REGULATION_OF_JUN_KINASE_ACTIVITY	79	0.38681	1.26901	0.21124	0.369311	1	9720	tags=67%, list=49%, signal=132%
GOBP_EMBRYONIC_PLACENTA_MORPHOGENESIS	23	0.424596	1.26888	0.187166	0.369269	1	5398	tags=39%, list=27%, signal=54%
GOBP_T_CELL_DIFFERENTIATION_IN_THYMUS	72	0.397696	1.26887	0.218692	0.369059	1	5972	tags=38%, list=30%, signal=54%
GOBP_NEGATIVE_REGULATION_OF_IMMUNE_RESPONSE	142	0.379802	1.26881	0.212963	0.368916	1	9054	tags=56%, list=46%, signal=102%
GOBP_NEGATIVE_REGULATION_OF_CELL_ADHESION	267	0.354935	1.26796	0.195212	0.36995	1	9076	tags=55%, list=46%, signal=101%
GOBP_REGULATION_OF_EXTENT_OF_CELL_GROWTH	102	0.36364	1.26769	0.193202	0.370132	1	5774	tags=36%, list=29%, signal=51%
GOBP_MEMBRANE_FISSION	15	0.517842	1.26758	0.209393	0.370038	1	8482	tags=73%, list=43%, signal=128%
GOBP_LABYRINTHINE_LAYER_DEVELOPMENT	43	0.39113	1.26564	0.174688	0.372865	1	6161	tags=42%, list=31%, signal=61%
GOBP_MEMBRANE_PROTEIN_PROTEOLYSIS	60	0.390707	1.26491	0.19963	0.373801	1	7555	tags=45%, list=38%, signal=73%
GOBP_RESPONSE_TO_HEPATOCYTE_GROWTH_FACTOR	18	0.492369	1.26371	0.202677	0.375395	1	7526	tags=61%, list=38%, signal=99%
GOBP_NEGATIVE_REGULATION_OF_VIRAL_PROCESS	84	0.391702	1.26327	0.226054	0.37585	1	9128	tags=58%, list=46%, signal=108%
GOBP_KIDNEY_MESENCHYME_DEVELOPMENT	19	0.474572	1.26317	0.214015	0.375772	1	4367	tags=32%, list=22%, signal=41%
GOBP_CD8_POSITIVE_ALPHA_BETA_T_CELL_ACTIVATION	26	0.48208	1.26274	0.261569	0.376168	1	7487	tags=62%, list=38%, signal=99%
GOBP_CELLULAR_RESPONSE_TO_TOPOLOGICALLY_INCORRECT_PROTEIN	159	0.372825	1.26258	0.216364	0.376203	1	7347	tags=45%, list=37%, signal=72%
GOBP_TRANSLATIONAL_INITIATION	191	0.451129	1.26256	0.270476	0.375997	1	6627	tags=45%, list=34%, signal=67%
GOBP_REGULATION_OF_RESPONSE_TO_ENDOPLASMIC_RETICULUM_STRESS	77	0.39253	1.26229	0.226592	0.376166	1	6374	tags=44%, list=32%, signal=65%
GOBP_LYMPHOID_PROGENITOR_CELL_DIFFERENTIATION	21	0.483233	1.26222	0.224806	0.376033	1	6023	tags=52%, list=30%, signal=75%
GOBP_POSITIVE_REGULATION_OF_EPIDERMAL_CELL_DIFFERENTIATION	23	0.409116	1.26193	0.161597	0.376251	1	6175	tags=43%, list=31%, signal=63%
GOBP_POSITIVE_REGULATION_OF_KERATINOCYTE_DIFFERENTIATION	15	0.456708	1.2618	0.180769	0.376233	1	5835	tags=47%, list=30%, signal=66%
GOBP_POSITIVE_REGULATION_OF_MEMBRANE_POTENTIAL	15	0.468519	1.26173	0.212727	0.376118	1	8161	tags=67%, list=41%, signal=114%
GOBP_REGULATION_OF_RAS_PROTEIN_SIGNAL_TRANSDUCTION	183	0.376497	1.26169	0.234286	0.375942	1	8329	tags=52%, list=42%, signal=90%
GOBP_REGULATION_OF_TUMOR_NECROSIS_FACTOR_MEDIATED_SIGNALING_PATHWAY	56	0.386262	1.26149	0.208413	0.376027	1	4450	tags=32%, list=23%, signal=41%
GOBP_RESPONSE_TO_ENDOPLASMIC_RETICULUM_STRESS	281	0.355866	1.26105	0.202899	0.376492	1	7393	tags=45%, list=37%, signal=71%
GOBP_NEGATIVE_REGULATION_OF_IMMUNE_SYSTEM_PROCESS	372	0.347471	1.26096	0.227106	0.376386	1	9392	tags=56%, list=48%, signal=105%
GOBP_INTESTINAL_EPITHELIAL_CELL_DIFFERENTIATION	20	0.417342	1.26055	0.176991	0.37677	1	2782	tags=20%, list=14%, signal=23%
GOBP_LEUKOCYTE_PROLIFERATION	304	0.359884	1.26046	0.260223	0.376677	1	9284	tags=59%, list=47%, signal=110%
GOBP_NEURONAL_STEM_CELL_POPULATION_MAINTENANCE	19	0.465565	1.26018	0.213483	0.376818	1	5797	tags=42%, list=29%, signal=60%
GOBP_PEPTIDYL_THREONINE_DEPHOSPHORYLATION	22	0.453587	1.26015	0.227799	0.376634	1	6789	tags=50%, list=34%, signal=76%
GOBP_POST_EMBRYONIC_DEVELOPMENT	74	0.380975	1.2593	0.20696	0.377666	1	8576	tags=57%, list=43%, signal=100%
GOBP_NEGATIVE_REGULATION_OF_PEPTIDYL_THREONINE_PHOSPHORYLATION	19	0.459428	1.25899	0.217391	0.377945	1	7724	tags=63%, list=39%, signal=104%
GOBP_EMBRYONIC_AXIS_SPECIFICATION	34	0.381518	1.25891	0.184643	0.377842	1	6040	tags=32%, list=31%, signal=47%
GOBP_REGULATION_OF_LYMPHOCYTE_MEDIATED_IMMUNITY	147	0.396051	1.25865	0.261628	0.377989	1	9364	tags=65%, list=47%, signal=123%
GOBP_NUCLEOTIDE_SUGAR_METABOLIC_PROCESS	35	0.433833	1.25846	0.225746	0.378034	1	8055	tags=60%, list=41%, signal=101%
GOBP_ESTABLISHMENT_OF_PROTEIN_LOCALIZATION_TO_MEMBRANE	331	0.356101	1.25832	0.227106	0.37801	1	7438	tags=44%, list=38%, signal=70%
GOBP_POSITIVE_REGULATION_OF_LYMPHOCYTE_DIFFERENTIATION	99	0.404133	1.25801	0.255814	0.378264	1	6809	tags=45%, list=34%, signal=69%
GOBP_COENZYME_A_METABOLIC_PROCESS	15	0.496868	1.25709	0.242938	0.379426	1	6734	tags=67%, list=34%, signal=101%
GOBP_GLYCEROLIPID_METABOLIC_PROCESS	410	0.310292	1.25682	0.173913	0.379612	1	9479	tags=53%, list=48%, signal=100%
GOBP_PREASSEMBLY_OF_GPI_ANCHOR_IN_ER_MEMBRANE	17	0.498619	1.25626	0.229839	0.380222	1	7055	tags=53%, list=36%, signal=82%
GOBP_TOLL_LIKE_RECEPTOR_4_SIGNALING_PATHWAY	38	0.451357	1.25619	0.228628	0.380085	1	7045	tags=53%, list=36%, signal=82%
GOBP_NEGATIVE_REGULATION_OF_TYPE_I_INTERFERON_PRODUCTION	42	0.442878	1.25563	0.246063	0.380756	1	6953	tags=55%, list=35%, signal=84%
GOBP_ENTEROENDOCRINE_CELL_DIFFERENTIATION	27	0.40826	1.2553	0.186594	0.381038	1	9208	tags=67%, list=47%, signal=125%
GOBP_NEGATIVE_REGULATION_OF_CYTOSKELETON_ORGANIZATION	141	0.360515	1.25406	0.191806	0.382705	1	8115	tags=50%, list=41%, signal=84%
GOBP_TOLERANCE_INDUCTION	26	0.50205	1.25393	0.287129	0.382655	1	5956	tags=50%, list=30%, signal=71%
GOBP_CELLULAR_RESPONSE_TO_REACTIVE_NITROGEN_SPECIES	16	0.467339	1.25362	0.211321	0.382921	1	5311	tags=44%, list=27%, signal=60%
GOBP_EMBRYONIC_SKELETAL_SYSTEM_DEVELOPMENT	116	0.340238	1.25351	0.20034	0.382867	1	9195	tags=48%, list=47%, signal=90%
GOBP_POSITIVE_REGULATION_OF_PROTEIN_MATURATION	24	0.401031	1.25322	0.201869	0.383083	1	6924	tags=42%, list=35%, signal=64%
GOBP_PROTEIN_HOMOTETRAMERIZATION	56	0.353552	1.25295	0.175221	0.383228	1	6456	tags=34%, list=33%, signal=50%
GOBP_NEGATIVE_REGULATION_OF_CELL_ACTIVATION	187	0.371297	1.25286	0.250922	0.383149	1	9054	tags=57%, list=46%, signal=104%
GOBP_POSITIVE_REGULATION_OF_NIK_NF_KAPPAB_SIGNALING	65	0.387358	1.25276	0.213333	0.383066	1	9664	tags=66%, list=49%, signal=129%
GOBP_CELLULAR_RESPONSE_TO_OSMOTIC_STRESS	39	0.392497	1.25241	0.182674	0.383348	1	5632	tags=44%, list=29%, signal=61%
GOBP_DEVELOPMENTAL_GROWTH_INVOLVED_IN_MORPHOGENESIS	220	0.351874	1.25219	0.207957	0.383418	1	5817	tags=33%, list=29%, signal=47%
GOBP_POSITIVE_REGULATION_OF_GLUCOSE_TRANSMEMBRANE_TRANSPORT	42	0.404169	1.25197	0.214022	0.383516	1	4844	tags=33%, list=25%, signal=44%
GOBP_INTERFERON_GAMMA_PRODUCTION	108	0.401809	1.25166	0.280534	0.383719	1	6787	tags=45%, list=34%, signal=69%
GOBP_POSITIVE_REGULATION_OF_CELL_PROJECTION_ORGANIZATION	323	0.342239	1.25147	0.230347	0.383753	1	8440	tags=49%, list=43%, signal=85%
GOBP_HISTONE_H3_DEACETYLATION	19	0.470515	1.25097	0.253438	0.384267	1	6452	tags=58%, list=33%, signal=86%
GOBP_REGULATION_OF_CELL_MORPHOGENESIS	293	0.34588	1.25091	0.226937	0.384119	1	8418	tags=49%, list=43%, signal=85%
GOBP_REGULATION_OF_TRANSPOSITION	24	0.435584	1.25054	0.218861	0.384433	1	8741	tags=58%, list=44%, signal=105%
GOBP_CIRCADIAN_REGULATION_OF_GENE_EXPRESSION	65	0.392486	1.25045	0.234375	0.384347	1	6693	tags=45%, list=34%, signal=67%
GOBP_NEGATIVE_REGULATION_OF_ATP_METABOLIC_PROCESS	25	0.385819	1.25039	0.198895	0.384186	1	6130	tags=40%, list=31%, signal=58%
GOBP_BETA_CATENIN_DESTRUCTION_COMPLEX_DISASSEMBLY	21	0.450909	1.25032	0.210938	0.384061	1	5230	tags=48%, list=26%, signal=65%
GOBP_POSITIVE_REGULATION_OF_LYMPHOCYTE_MIGRATION	36	0.409335	1.25018	0.230347	0.384068	1	6768	tags=44%, list=34%, signal=67%
GOBP_REGULATION_OF_EXOSOMAL_SECRETION	15	0.481511	1.25016	0.224678	0.383868	1	7370	tags=67%, list=37%, signal=106%
GOBP_CHAPERONE_MEDIATED_PROTEIN_FOLDING	59	0.392751	1.24976	0.214286	0.384238	1	3854	tags=31%, list=20%, signal=38%
GOBP_UBIQUINONE_METABOLIC_PROCESS	16	0.491468	1.24957	0.239006	0.384286	1	8170	tags=69%, list=41%, signal=117%
GOBP_CELLULAR_AMINO_ACID_BIOSYNTHETIC_PROCESS	70	0.358877	1.2495	0.190141	0.384156	1	5582	tags=33%, list=28%, signal=46%
GOBP_REGULATION_OF_T_CELL_APOPTOTIC_PROCESS	34	0.417966	1.24842	0.226168	0.38562	1	8839	tags=62%, list=45%, signal=112%
GOBP_GPI_ANCHOR_METABOLIC_PROCESS	32	0.441475	1.2481	0.238274	0.385846	1	8636	tags=59%, list=44%, signal=105%
GOBP_REGULATION_OF_ADAPTIVE_IMMUNE_RESPONSE	159	0.389498	1.24804	0.254864	0.385701	1	9271	tags=60%, list=47%, signal=113%
GOBP_POST_GOLGI_VESICLE_MEDIATED_TRANSPORT	100	0.407302	1.24768	0.250988	0.385998	1	6648	tags=52%, list=34%, signal=78%
GOBP_RETINA_DEVELOPMENT_IN_CAMERA_TYPE_EYE	142	0.313844	1.24739	0.174204	0.386199	1	7738	tags=39%, list=39%, signal=63%
GOBP_CD4_POSITIVE_ALPHA_BETA_T_CELL_DIFFERENTIATION	80	0.415744	1.24712	0.253465	0.386365	1	7429	tags=54%, list=38%, signal=86%
GOBP_RESPONSE_TO_TUMOR_CELL	26	0.435631	1.24689	0.236641	0.386458	1	6138	tags=42%, list=31%, signal=61%
GOBP_CELLULAR_RESPONSE_TO_MECHANICAL_STIMULUS	73	0.394075	1.2468	0.225688	0.386363	1	7966	tags=49%, list=40%, signal=82%
GOBP_GROOMING_BEHAVIOR	16	0.434969	1.24679	0.205782	0.386151	1	1986	tags=13%, list=10%, signal=14%
GOBP_LABYRINTHINE_LAYER_BLOOD_VESSEL_DEVELOPMENT	17	0.450706	1.24678	0.220755	0.38595	1	5833	tags=53%, list=30%, signal=75%
GOBP_TETRAPYRROLE_BIOSYNTHETIC_PROCESS	27	0.442111	1.24677	0.248148	0.385723	1	7617	tags=63%, list=39%, signal=102%
GOBP_REGULATION_OF_NERVOUS_SYSTEM_DEVELOPMENT	404	0.319676	1.24653	0.201389	0.385876	1	6161	tags=32%, list=31%, signal=46%
GOBP_REGULATION_OF_MYELOID_LEUKOCYTE_DIFFERENTIATION	114	0.359574	1.24583	0.231752	0.386678	1	9918	tags=57%, list=50%, signal=114%
GOBP_NUCLEOSIDE_BISPHOSPHATE_METABOLIC_PROCESS	133	0.334643	1.24577	0.185512	0.386528	1	8946	tags=52%, list=45%, signal=94%
GOBP_NUCLEOBASE_CONTAINING_SMALL_MOLECULE_BIOSYNTHETIC_PROCESS	109	0.332907	1.24569	0.162587	0.386424	1	9016	tags=49%, list=46%, signal=89%
GOBP_MUSCLE_CELL_APOPTOTIC_PROCESS	61	0.348021	1.24551	0.180702	0.386455	1	9283	tags=54%, list=47%, signal=102%
GOBP_POSITIVE_REGULATION_OF_SMALL_GTPASE_MEDIATED_SIGNAL_TRANSDUCTION	73	0.380389	1.24544	0.22963	0.386362	1	8556	tags=55%, list=43%, signal=96%
GOBP_RESPONSE_TO_MOLECULE_OF_BACTERIAL_ORIGIN	326	0.340525	1.24528	0.22043	0.386373	1	7552	tags=39%, list=38%, signal=62%
GOBP_NEGATIVE_REGULATION_OF_AXONOGENESIS	65	0.366614	1.24505	0.203833	0.386494	1	5898	tags=38%, list=30%, signal=55%
GOBP_POSITIVE_REGULATION_OF_GROWTH	233	0.315709	1.24456	0.182759	0.386953	1	5833	tags=28%, list=30%, signal=40%
GOBP_CELLULAR_RESPONSE_TO_LIPOPROTEIN_PARTICLE_STIMULUS	30	0.422382	1.24445	0.230624	0.386904	1	7122	tags=53%, list=36%, signal=83%
GOBP_ACTIN_POLYMERIZATION_OR_DEPOLYMERIZATION	198	0.338192	1.24408	0.197441	0.387207	1	8274	tags=52%, list=42%, signal=88%
GOBP_LIPOPOLYSACCHARIDE_MEDIATED_SIGNALING_PATHWAY	57	0.405582	1.24375	0.238185	0.387473	1	7638	tags=47%, list=39%, signal=77%
GOBP_REGULATION_OF_LIPID_METABOLIC_PROCESS	373	0.309107	1.24337	0.185567	0.387844	1	6498	tags=33%, list=33%, signal=49%
GOBP_SYNAPTIC_VESICLE_TRANSPORT	41	0.403784	1.24336	0.230056	0.387635	1	9029	tags=73%, list=46%, signal=134%
GOBP_MORPHOGENESIS_OF_A_POLARIZED_EPITHELIUM	143	0.356054	1.24324	0.197842	0.387575	1	8705	tags=53%, list=44%, signal=94%
GOBP_CELLULAR_DEFENSE_RESPONSE	51	0.435285	1.243	0.273946	0.387716	1	8110	tags=61%, list=41%, signal=103%
GOBP_PROTEIN_TARGETING_TO_VACUOLE	39	0.446002	1.24295	0.242661	0.387559	1	7098	tags=64%, list=36%, signal=100%
GOBP_PROTEIN_HYDROXYLATION	26	0.422081	1.24265	0.223265	0.387796	1	5314	tags=38%, list=27%, signal=53%
GOBP_POSITIVE_REGULATION_OF_CELL_ADHESION_MEDIATED_BY_INTEGRIN	21	0.444815	1.24261	0.231618	0.387625	1	5969	tags=48%, list=30%, signal=68%
GOBP_NEGATIVE_REGULATION_OF_AXON_EXTENSION	43	0.375123	1.24135	0.213087	0.389317	1	5624	tags=37%, list=28%, signal=52%
GOBP_COPII_COATED_VESICLE_CARGO_LOADING	15	0.535136	1.24134	0.268537	0.389104	1	8829	tags=93%, list=45%, signal=169%
GOBP_POSITIVE_REGULATION_OF_CELL_ADHESION	410	0.352386	1.24123	0.235185	0.389019	1	6822	tags=42%, list=35%, signal=63%
GOBP_RESPONSE_TO_TOPOLOGICALLY_INCORRECT_PROTEIN	196	0.357177	1.2412	0.226212	0.388834	1	7347	tags=45%, list=37%, signal=71%
GOBP_SYNAPTIC_VESICLE_PRIMING	19	0.450296	1.24117	0.230769	0.388646	1	8181	tags=58%, list=41%, signal=99%
GOBP_NEGATIVE_REGULATION_OF_CELL_GROWTH	178	0.328296	1.24105	0.201389	0.388612	1	6167	tags=34%, list=31%, signal=49%
GOBP_NEGATIVE_REGULATION_OF_B_CELL_PROLIFERATION	17	0.523129	1.2409	0.280738	0.388624	1	9428	tags=100%, list=48%, signal=191%
GOBP_NEURAL_PRECURSOR_CELL_PROLIFERATION	133	0.33497	1.2409	0.183422	0.388397	1	8433	tags=44%, list=43%, signal=76%
GOBP_ORGANISM_EMERGENCE_FROM_PROTECTIVE_STRUCTURE	21	0.393115	1.24079	0.165468	0.388326	1	3493	tags=24%, list=18%, signal=29%
GOBP_METENCEPHALON_DEVELOPMENT	99	0.338211	1.23998	0.188811	0.389357	1	5331	tags=31%, list=27%, signal=43%
GOBP_POSITIVE_REGULATION_OF_CELLULAR_CARBOHYDRATE_METABOLIC_PROCESS	50	0.362124	1.23985	0.177656	0.389289	1	7711	tags=46%, list=39%, signal=75%
GOBP_NEGATIVE_REGULATION_OF_NF_KAPPAB_TRANSCRIPTION_FACTOR_ACTIVITY	81	0.364178	1.23942	0.198113	0.389739	1	9130	tags=57%, list=46%, signal=105%
GOBP_EMBRYONIC_EYE_MORPHOGENESIS	32	0.413582	1.23925	0.237477	0.389757	1	5242	tags=34%, list=27%, signal=47%
GOBP_INTERLEUKIN_12_PRODUCTION	59	0.43067	1.23921	0.271287	0.38959	1	7466	tags=56%, list=38%, signal=90%
GOBP_REGULATION_OF_SYNAPTIC_VESICLE_ENDOCYTOSIS	15	0.5158	1.23909	0.232075	0.389551	1	6111	tags=53%, list=31%, signal=77%
GOBP_REGULATION_OF_AUTOPHAGOSOME_ASSEMBLY	38	0.427962	1.23881	0.265918	0.38974	1	8195	tags=63%, list=41%, signal=108%
GOBP_NEGATIVE_REGULATION_OF_PLASMA_MEMBRANE_BOUNDED_CELL_PROJECTION_ASSEMBLY	29	0.411751	1.23878	0.231638	0.389547	1	9220	tags=59%, list=47%, signal=110%
GOBP_POSITIVE_REGULATION_OF_HEMOPOIESIS	151	0.3776	1.23872	0.256167	0.389398	1	9602	tags=59%, list=49%, signal=114%
GOBP_SULFUR_AMINO_ACID_METABOLIC_PROCESS	35	0.384118	1.23816	0.216607	0.389972	1	5582	tags=37%, list=28%, signal=52%
GOBP_NEGATIVE_REGULATION_OF_NIK_NF_KAPPAB_SIGNALING	23	0.431269	1.23748	0.221374	0.390733	1	8311	tags=61%, list=42%, signal=105%
GOBP_CELLULAR_CARBOHYDRATE_BIOSYNTHETIC_PROCESS	85	0.344026	1.23735	0.179262	0.390731	1	7667	tags=41%, list=39%, signal=67%
GOBP_MITOPHAGY	22	0.469216	1.23731	0.255769	0.390575	1	6043	tags=50%, list=31%, signal=72%
GOBP_KETONE_BIOSYNTHETIC_PROCESS	40	0.360537	1.23729	0.177778	0.390384	1	6418	tags=38%, list=32%, signal=55%
GOBP_REGULATION_OF_VESICLE_MEDIATED_TRANSPORT	487	0.317458	1.23722	0.184919	0.390279	1	7647	tags=43%, list=39%, signal=68%
GOBP_CELLULAR_RESPONSE_TO_STEROL_DEPLETION	15	0.524603	1.23677	0.25098	0.39072	1	6493	tags=67%, list=33%, signal=99%
GOBP_REGULATION_OF_ACTIN_FILAMENT_LENGTH	170	0.345972	1.23664	0.207407	0.390684	1	8274	tags=52%, list=42%, signal=89%
GOBP_POSITIVE_REGULATION_OF_DEPHOSPHORYLATION	57	0.381376	1.23643	0.222018	0.39077	1	8090	tags=53%, list=41%, signal=89%
GOBP_NEGATIVE_REGULATION_OF_VIRAL_TRANSCRIPTION	15	0.480686	1.23635	0.221154	0.390673	1	8602	tags=67%, list=44%, signal=118%
GOBP_POSITIVE_REGULATION_OF_TUMOR_NECROSIS_FACTOR_SUPERFAMILY_CYTOKINE_PRODUCTION	85	0.386618	1.2363	0.240223	0.39051	1	6768	tags=45%, list=34%, signal=68%
GOBP_POSITIVE_REGULATION_OF_BONE_RESORPTION	19	0.443608	1.23563	0.236162	0.391281	1	9067	tags=53%, list=46%, signal=97%
GOBP_REGULATION_OF_EXOCYTOSIS	187	0.326238	1.23447	0.193841	0.392785	1	7711	tags=42%, list=39%, signal=69%
GOBP_B_CELL_RECEPTOR_SIGNALING_PATHWAY	59	0.436625	1.23386	0.296296	0.393468	1	9162	tags=75%, list=46%, signal=139%
GOBP_POSITIVE_REGULATION_OF_CELL_DEVELOPMENT	281	0.325428	1.23303	0.196396	0.394485	1	6161	tags=33%, list=31%, signal=47%
GOBP_CENTRAL_NERVOUS_SYSTEM_NEURON_DIFFERENTIATION	177	0.324372	1.23287	0.1843	0.394483	1	9319	tags=51%, list=47%, signal=96%
GOBP_POSITIVE_REGULATION_OF_CD4_POSITIVE_ALPHA_BETA_T_CELL_DIFFERENTIATION	31	0.465134	1.23268	0.295585	0.394529	1	6809	tags=55%, list=34%, signal=84%
GOBP_TONGUE_DEVELOPMENT	20	0.420951	1.23249	0.206148	0.394551	1	8387	tags=55%, list=42%, signal=95%
GOBP_LONG_CHAIN_FATTY_ACYL_COA_METABOLIC_PROCESS	23	0.408841	1.23247	0.219331	0.394363	1	8880	tags=74%, list=45%, signal=134%
GOBP_ESTABLISHMENT_OF_PROTEIN_LOCALIZATION_TO_PLASMA_MEMBRANE	53	0.390624	1.23217	0.226744	0.394588	1	6606	tags=49%, list=33%, signal=74%
GOBP_RESPONSE_TO_MISFOLDED_PROTEIN	23	0.442911	1.2316	0.231068	0.395223	1	4850	tags=43%, list=25%, signal=58%
GOBP_REGULATION_OF_PLATELET_DERIVED_GROWTH_FACTOR_RECEPTOR_SIGNALING_PATHWAY	22	0.437948	1.23052	0.211577	0.396675	1	7204	tags=55%, list=36%, signal=86%
GOBP_NATURAL_KILLER_CELL_ACTIVATION	83	0.369931	1.23049	0.229602	0.396485	1	9322	tags=59%, list=47%, signal=111%
GOBP_DENDRITIC_CELL_MIGRATION	29	0.44792	1.23009	0.266402	0.396842	1	8854	tags=69%, list=45%, signal=125%
GOBP_MEMBRANE_LIPID_BIOSYNTHETIC_PROCESS	135	0.329892	1.23001	0.202128	0.396725	1	8831	tags=52%, list=45%, signal=93%
GOBP_NEGATIVE_REGULATION_OF_T_CELL_PROLIFERATION	62	0.390352	1.22969	0.277574	0.396998	1	7585	tags=53%, list=38%, signal=86%
GOBP_IMMUNE_RESPONSE_TO_TUMOR_CELL	20	0.460618	1.22959	0.252485	0.396908	1	5004	tags=40%, list=25%, signal=54%
GOBP_NECROPTOTIC_PROCESS	36	0.423525	1.22952	0.243191	0.396781	1	7242	tags=53%, list=37%, signal=83%
GOBP_CELLULAR_RESPONSE_TO_PROSTAGLANDIN_STIMULUS	20	0.451596	1.22948	0.255597	0.396607	1	6362	tags=50%, list=32%, signal=74%
GOBP_RUFFLE_ASSEMBLY	41	0.3775	1.22914	0.200371	0.3969	1	3035	tags=24%, list=15%, signal=29%
GOBP_POSITIVE_REGULATION_OF_SMOOTHENED_SIGNALING_PATHWAY	31	0.44253	1.22906	0.275665	0.396786	1	8150	tags=55%, list=41%, signal=93%
GOBP_FEMALE_SEX_DIFFERENTIATION	111	0.314126	1.22846	0.195616	0.397457	1	7798	tags=36%, list=39%, signal=59%
GOBP_ADAPTIVE_IMMUNE_RESPONSE_BASED_ON_SOMATIC_RECOMBINATION_OF_IMMUNE_RECEPTORS_BUILT_FROM_IMMUNOGLOBULIN_SUPERFAMILY_DOMAINS	246	0.376442	1.22713	0.273256	0.399204	1	9271	tags=59%, list=47%, signal=110%
GOBP_POSITIVE_REGULATION_OF_EPIDERMIS_DEVELOPMENT	27	0.378344	1.22686	0.195531	0.399403	1	6175	tags=41%, list=31%, signal=59%
GOBP_REGULATION_OF_MAST_CELL_ACTIVATION	39	0.412821	1.22532	0.269303	0.401565	1	6143	tags=46%, list=31%, signal=67%
GOBP_NEGATIVE_REGULATION_OF_MAP_KINASE_ACTIVITY	74	0.354884	1.22513	0.233696	0.401592	1	6143	tags=32%, list=31%, signal=47%
GOBP_TRNA_5_END_PROCESSING	15	0.544669	1.22512	0.272366	0.401378	1	2234	tags=33%, list=11%, signal=38%
GOBP_REGULATION_OF_TOLL_LIKE_RECEPTOR_SIGNALING_PATHWAY	68	0.402603	1.22503	0.244048	0.401294	1	7449	tags=46%, list=38%, signal=73%
GOBP_VENTRAL_SPINAL_CORD_DEVELOPMENT	43	0.372275	1.22487	0.186736	0.401297	1	9168	tags=53%, list=46%, signal=100%
GOBP_POSITIVE_REGULATION_OF_SMOOTH_MUSCLE_CELL_MIGRATION	35	0.422301	1.22439	0.248162	0.401814	1	5817	tags=40%, list=29%, signal=57%
GOBP_NEGATIVE_REGULATION_OF_CELLULAR_RESPONSE_TO_INSULIN_STIMULUS	37	0.394216	1.22384	0.246753	0.402387	1	7465	tags=49%, list=38%, signal=78%
GOBP_PEPTIDYL_L_CYSTEINE_S_PALMITOYLATION	24	0.401349	1.22369	0.213235	0.402363	1	6444	tags=46%, list=33%, signal=68%
GOBP_STRIATUM_DEVELOPMENT	16	0.446437	1.22347	0.229602	0.402444	1	3288	tags=25%, list=17%, signal=30%
GOBP_TETRAPYRROLE_METABOLIC_PROCESS	59	0.363057	1.22279	0.24596	0.403255	1	8283	tags=51%, list=42%, signal=87%
GOBP_LYSOSOME_LOCALIZATION	70	0.366022	1.22278	0.231203	0.403039	1	6921	tags=47%, list=35%, signal=72%
GOBP_NEGATIVE_REGULATION_OF_WNT_SIGNALING_PATHWAY	204	0.324331	1.22256	0.217926	0.403157	1	5643	tags=30%, list=29%, signal=42%
GOBP_SMOOTHENED_SIGNALING_PATHWAY	123	0.372953	1.22222	0.257944	0.403444	1	5828	tags=37%, list=30%, signal=53%
GOBP_POSITIVE_REGULATION_OF_T_HELPER_CELL_DIFFERENTIATION	21	0.464527	1.22221	0.273622	0.403215	1	6809	tags=52%, list=34%, signal=80%
GOBP_CELLULAR_RESPONSE_TO_LEPTIN_STIMULUS	19	0.414836	1.2222	0.246869	0.403008	1	3836	tags=21%, list=19%, signal=26%
GOBP_SUBSTRATE_ADHESION_DEPENDENT_CELL_SPREADING	105	0.35736	1.22202	0.233577	0.403039	1	6017	tags=35%, list=30%, signal=50%
GOBP_POSITIVE_REGULATION_OF_CALCIUM_MEDIATED_SIGNALING	29	0.399286	1.22119	0.229508	0.40416	1	4900	tags=34%, list=25%, signal=46%
GOBP_GOLGI_TO_PLASMA_MEMBRANE_TRANSPORT	56	0.389719	1.22092	0.239845	0.404334	1	6648	tags=50%, list=34%, signal=75%
GOBP_REGULATION_OF_CELL_DEVELOPMENT	462	0.315768	1.22081	0.213404	0.404258	1	6161	tags=32%, list=31%, signal=45%
GOBP_REGULATION_OF_MYELOID_LEUKOCYTE_MEDIATED_IMMUNITY	51	0.400115	1.22037	0.26186	0.404639	1	8920	tags=61%, list=45%, signal=111%
GOBP_PROTEIN_LOCALIZATION_TO_GOLGI_APPARATUS	28	0.435665	1.21976	0.276471	0.405344	1	8748	tags=64%, list=44%, signal=115%
GOBP_T_CELL_DIFFERENTIATION_INVOLVED_IN_IMMUNE_RESPONSE	72	0.405251	1.21969	0.27451	0.405231	1	9664	tags=68%, list=49%, signal=133%
GOBP_REGULATION_OF_HIPPO_SIGNALING	20	0.464584	1.21918	0.264925	0.405737	1	3969	tags=35%, list=20%, signal=44%
GOBP_POSITIVE_REGULATION_OF_NEURON_PROJECTION_DEVELOPMENT	142	0.35014	1.21887	0.264117	0.40597	1	8417	tags=51%, list=43%, signal=88%
GOBP_LIPOPROTEIN_METABOLIC_PROCESS	130	0.320403	1.21833	0.212803	0.406502	1	8652	tags=48%, list=44%, signal=84%
GOBP_POSITIVE_REGULATION_OF_ANION_TRANSMEMBRANE_TRANSPORT	57	0.379061	1.21773	0.238722	0.407149	1	6845	tags=42%, list=35%, signal=64%
GOBP_FEAR_RESPONSE	37	0.357823	1.21767	0.219224	0.407012	1	2595	tags=16%, list=13%, signal=19%
GOBP_RESPONSE_TO_EPIDERMAL_GROWTH_FACTOR	44	0.412571	1.21729	0.277359	0.407344	1	2699	tags=27%, list=14%, signal=32%
GOBP_ESTABLISHMENT_OF_PROTEIN_LOCALIZATION_TO_VACUOLE	51	0.388405	1.21726	0.235075	0.407166	1	7098	tags=51%, list=36%, signal=79%
GOBP_EPITHELIAL_TUBE_MORPHOGENESIS	306	0.328937	1.21708	0.229242	0.407198	1	9456	tags=51%, list=48%, signal=96%
GOBP_NEGATIVE_REGULATION_OF_SMOOTHENED_SIGNALING_PATHWAY	29	0.445526	1.2165	0.28215	0.407883	1	7659	tags=59%, list=39%, signal=96%
GOBP_MACROPHAGE_DIFFERENTIATION	45	0.39723	1.2161	0.266791	0.408247	1	3609	tags=29%, list=18%, signal=35%
GOBP_MAINTENANCE_OF_PROTEIN_LOCALIZATION_IN_ORGANELLE	42	0.377709	1.21568	0.210054	0.408678	1	7800	tags=50%, list=39%, signal=82%
GOBP_POSITIVE_REGULATION_OF_PROTEIN_DEACETYLATION	22	0.41287	1.21566	0.217311	0.40848	1	6493	tags=50%, list=33%, signal=74%
GOBP_POSITIVE_REGULATION_OF_INTERLEUKIN_1_PRODUCTION	59	0.385768	1.21562	0.270221	0.408333	1	6951	tags=41%, list=35%, signal=63%
GOBP_PROTEIN_MANNOSYLATION	19	0.451689	1.21421	0.245648	0.410278	1	7706	tags=58%, list=39%, signal=95%
GOBP_PEPTIDYL_TYROSINE_MODIFICATION	359	0.328306	1.21293	0.247706	0.412043	1	8556	tags=47%, list=43%, signal=81%
GOBP_T_CELL_MIGRATION	64	0.398227	1.21278	0.299065	0.412042	1	8151	tags=52%, list=41%, signal=88%
GOBP_NATURAL_KILLER_CELL_MEDIATED_IMMUNITY	66	0.407339	1.21269	0.285441	0.411951	1	9364	tags=65%, list=47%, signal=123%
GOBP_T_HELPER_1_CELL_DIFFERENTIATION	18	0.451587	1.21217	0.249004	0.412553	1	6459	tags=50%, list=33%, signal=74%
GOBP_POSITIVE_REGULATION_OF_MUSCLE_CELL_APOPTOTIC_PROCESS	23	0.396528	1.21211	0.207207	0.412421	1	9555	tags=65%, list=48%, signal=126%
GOBP_REGULATION_OF_LEUKOCYTE_PROLIFERATION	233	0.358996	1.21205	0.287037	0.412281	1	9158	tags=59%, list=46%, signal=108%
GOBP_PROTEIN_TARGETING	422	0.339018	1.21198	0.271095	0.412163	1	7539	tags=44%, list=38%, signal=70%
GOBP_RESPONSE_TO_INTERFERON_ALPHA	20	0.499148	1.21178	0.29249	0.412233	1	8301	tags=70%, list=42%, signal=121%
GOBP_MAINTENANCE_OF_PROTEIN_LOCATION_IN_CELL	64	0.349347	1.21145	0.213382	0.412499	1	8655	tags=56%, list=44%, signal=100%
GOBP_MAMMARY_GLAND_EPITHELIUM_DEVELOPMENT	62	0.361373	1.21133	0.241441	0.412467	1	5624	tags=32%, list=28%, signal=45%
GOBP_POSITIVE_REGULATION_OF_FOCAL_ADHESION_ASSEMBLY	25	0.455216	1.21087	0.254789	0.41296	1	5898	tags=44%, list=30%, signal=63%
GOBP_PORPHYRIN_CONTAINING_COMPOUND_METABOLIC_PROCESS	39	0.394091	1.21062	0.247706	0.413122	1	8283	tags=59%, list=42%, signal=101%
GOBP_B_CELL_PROLIFERATION	96	0.383426	1.21	0.290135	0.413809	1	9284	tags=64%, list=47%, signal=119%
GOBP_POSITIVE_REGULATION_OF_ERBB_SIGNALING_PATHWAY	39	0.402019	1.20989	0.26087	0.41378	1	8440	tags=54%, list=43%, signal=94%
GOBP_POSITIVE_REGULATION_OF_ALPHA_BETA_T_CELL_PROLIFERATION	21	0.511456	1.2093	0.297244	0.41447	1	6821	tags=67%, list=35%, signal=102%
GOBP_T_HELPER_17_TYPE_IMMUNE_RESPONSE	32	0.444776	1.20917	0.28	0.414431	1	9537	tags=72%, list=48%, signal=139%
GOBP_LOW_DENSITY_LIPOPROTEIN_PARTICLE_CLEARANCE	34	0.379869	1.20888	0.218018	0.414673	1	8300	tags=47%, list=42%, signal=81%
GOBP_REGULATION_OF_MACROPHAGE_DIFFERENTIATION	20	0.44505	1.20795	0.265896	0.415932	1	5566	tags=40%, list=28%, signal=56%
GOBP_BONE_MATURATION	20	0.420462	1.20793	0.22963	0.415723	1	8182	tags=50%, list=41%, signal=85%
GOBP_POSITIVE_REGULATION_OF_OSTEOCLAST_DIFFERENTIATION	27	0.423058	1.20785	0.260148	0.415608	1	9271	tags=67%, list=47%, signal=125%
GOBP_REGULATION_OF_G_PROTEIN_COUPLED_RECEPTOR_SIGNALING_PATHWAY	136	0.306504	1.20771	0.196309	0.415601	1	7587	tags=37%, list=38%, signal=59%
GOBP_SERINE_PHOSPHORYLATION_OF_STAT_PROTEIN	27	0.399759	1.20746	0.263717	0.415796	1	2526	tags=19%, list=13%, signal=21%
GOBP_MYELOID_LEUKOCYTE_CYTOKINE_PRODUCTION	26	0.434548	1.20707	0.265896	0.41615	1	6387	tags=42%, list=32%, signal=62%
GOBP_POSITIVE_REGULATION_OF_ADAPTIVE_IMMUNE_RESPONSE	93	0.394655	1.20662	0.271825	0.416614	1	9271	tags=65%, list=47%, signal=121%
GOBP_NEGATIVE_REGULATION_OF_SMALL_MOLECULE_METABOLIC_PROCESS	87	0.312231	1.20648	0.212281	0.416584	1	6389	tags=34%, list=32%, signal=51%
GOBP_POSITIVE_REGULATION_OF_AMYLOID_BETA_FORMATION	17	0.45303	1.2048	0.242661	0.419049	1	9093	tags=76%, list=46%, signal=142%
GOBP_T_CELL_ACTIVATION_INVOLVED_IN_IMMUNE_RESPONSE	110	0.359396	1.20468	0.273764	0.418998	1	9767	tags=62%, list=49%, signal=122%
GOBP_PROTEIN_LOCALIZATION_TO_ENDOSOME	23	0.456832	1.20467	0.267717	0.418777	1	4021	tags=39%, list=20%, signal=49%
GOBP_INTRA_GOLGI_VESICLE_MEDIATED_TRANSPORT	33	0.461549	1.20332	0.314342	0.420607	1	6996	tags=67%, list=35%, signal=103%
GOBP_POSITIVE_REGULATION_OF_PROTEIN_LOCALIZATION_TO_CELL_SURFACE	16	0.438449	1.20324	0.244533	0.420496	1	5446	tags=38%, list=28%, signal=52%
GOBP_AEROBIC_RESPIRATION	82	0.387395	1.20301	0.277359	0.420656	1	6449	tags=46%, list=33%, signal=69%
GOBP_ACTIN_FILAMENT_SEVERING	16	0.451552	1.20292	0.235294	0.420557	1	3244	tags=38%, list=16%, signal=45%
GOBP_REGULATION_OF_PEPTIDASE_ACTIVITY	422	0.282639	1.20276	0.19967	0.420567	1	4538	tags=22%, list=23%, signal=27%
GOBP_REGULATION_OF_CD4_POSITIVE_ALPHA_BETA_T_CELL_ACTIVATION	64	0.403056	1.2027	0.318359	0.420446	1	6809	tags=47%, list=34%, signal=71%
GOBP_ZINC_ION_TRANSPORT	27	0.400117	1.20237	0.262032	0.420699	1	11086	tags=81%, list=56%, signal=185%
GOBP_NEGATIVE_REGULATION_OF_INTERLEUKIN_10_PRODUCTION	18	0.498188	1.20203	0.288	0.42099	1	9271	tags=89%, list=47%, signal=167%
GOBP_OSTEOCLAST_DIFFERENTIATION	90	0.370622	1.20149	0.275926	0.421558	1	9428	tags=59%, list=48%, signal=112%
GOBP_MAINTENANCE_OF_LOCATION_IN_CELL	201	0.319238	1.20105	0.242259	0.422005	1	8655	tags=48%, list=44%, signal=84%
GOBP_MULTI_ORGANISM_CELLULAR_PROCESS	15	0.461691	1.20103	0.261628	0.421816	1	6847	tags=67%, list=35%, signal=102%
GOBP_MICROVILLUS_ASSEMBLY	16	0.441451	1.20082	0.248555	0.421894	1	9306	tags=63%, list=47%, signal=118%
GOBP_REGULATION_OF_KERATINOCYTE_DIFFERENTIATION	38	0.387627	1.2005	0.249077	0.422143	1	6515	tags=42%, list=33%, signal=63%
GOBP_TRANSLATIONAL_ELONGATION	127	0.441107	1.20034	0.321429	0.422161	1	4632	tags=42%, list=23%, signal=54%
GOBP_NEGATIVE_REGULATION_OF_PROTEIN_BINDING	91	0.318494	1.20019	0.20885	0.422151	1	7335	tags=40%, list=37%, signal=63%
GOBP_AUTOPHAGOSOME_MATURATION	39	0.409209	1.1999	0.291188	0.422376	1	6448	tags=49%, list=33%, signal=72%
GOBP_NEGATIVE_REGULATION_OF_LEUKOCYTE_PROLIFERATION	84	0.379037	1.1993	0.305816	0.423115	1	9428	tags=68%, list=48%, signal=129%
GOBP_LOCALIZATION_WITHIN_MEMBRANE	72	0.334337	1.19901	0.20885	0.423355	1	5550	tags=36%, list=28%, signal=50%
GOBP_NEGATIVE_REGULATION_OF_ALPHA_BETA_T_CELL_ACTIVATION	40	0.41158	1.19866	0.296146	0.423685	1	6605	tags=45%, list=33%, signal=67%
GOBP_CARBOHYDRATE_DERIVATIVE_TRANSPORT	82	0.33958	1.19858	0.224044	0.423567	1	9409	tags=56%, list=48%, signal=107%
GOBP_MEMBRANE_LIPID_METABOLIC_PROCESS	199	0.312562	1.19846	0.223932	0.423517	1	8729	tags=48%, list=44%, signal=85%
GOBP_REGULATION_OF_SYNAPSE_STRUCTURE_OR_ACTIVITY	203	0.316812	1.19816	0.230375	0.423714	1	5026	tags=25%, list=25%, signal=33%
GOBP_OSTEOCLAST_DEVELOPMENT	16	0.469561	1.19801	0.263366	0.423683	1	8786	tags=63%, list=44%, signal=112%
GOBP_FATTY_ACYL_COA_METABOLIC_PROCESS	39	0.366404	1.19787	0.250916	0.423689	1	8946	tags=62%, list=45%, signal=112%
GOBP_POSITIVE_REGULATION_OF_NERVOUS_SYSTEM_DEVELOPMENT	252	0.319027	1.19751	0.252252	0.424029	1	6161	tags=32%, list=31%, signal=46%
GOBP_REGULATION_OF_PROTEIN_CONTAINING_COMPLEX_DISASSEMBLY	111	0.3708	1.19746	0.286807	0.423866	1	6569	tags=43%, list=33%, signal=64%
GOBP_RESPONSE_TO_PLATELET_DERIVED_GROWTH_FACTOR	17	0.447371	1.19696	0.282398	0.424414	1	6924	tags=47%, list=35%, signal=72%
GOBP_NEGATIVE_REGULATION_OF_EXOCYTOSIS	28	0.436548	1.19687	0.285421	0.424317	1	7428	tags=54%, list=38%, signal=86%
GOBP_NEGATIVE_REGULATION_OF_ADAPTIVE_IMMUNE_RESPONSE	52	0.407049	1.19656	0.281188	0.424561	1	8822	tags=54%, list=45%, signal=97%
GOBP_POSITIVE_REGULATION_OF_ATP_METABOLIC_PROCESS	38	0.351442	1.19656	0.235993	0.424329	1	4162	tags=26%, list=21%, signal=33%
GOBP_ENDOSOME_ORGANIZATION	74	0.372887	1.19639	0.269017	0.42435	1	7984	tags=53%, list=40%, signal=88%
GOBP_ENDOTHELIAL_CELL_PROLIFERATION	139	0.333562	1.19613	0.255692	0.424524	1	5398	tags=30%, list=27%, signal=41%
GOBP_NOTCH_SIGNALING_PATHWAY	175	0.322717	1.19607	0.258803	0.424381	1	5939	tags=31%, list=30%, signal=45%
GOBP_CERAMIDE_BIOSYNTHETIC_PROCESS	65	0.334678	1.19588	0.225524	0.424478	1	7223	tags=38%, list=37%, signal=60%
GOBP_POSITIVE_REGULATION_OF_SUBSTRATE_ADHESION_DEPENDENT_CELL_SPREADING	40	0.370722	1.19568	0.259857	0.424522	1	5773	tags=38%, list=29%, signal=53%
GOBP_POSTSYNAPTIC_SPECIALIZATION_ORGANIZATION	30	0.379671	1.19562	0.244792	0.424398	1	10278	tags=63%, list=52%, signal=132%
GOBP_SPINAL_CORD_DEVELOPMENT	99	0.324383	1.1956	0.259696	0.424195	1	9588	tags=51%, list=49%, signal=98%
GOBP_VESICLE_MEDIATED_TRANSPORT_BETWEEN_ENDOSOMAL_COMPARTMENTS	41	0.408121	1.19522	0.288719	0.424594	1	6435	tags=54%, list=33%, signal=79%
GOBP_NEGATIVE_REGULATION_OF_ANDROGEN_RECEPTOR_SIGNALING_PATHWAY	15	0.466415	1.19522	0.283465	0.424362	1	6167	tags=53%, list=31%, signal=77%
GOBP_MICROTUBULE_BUNDLE_FORMATION	94	0.381848	1.1951	0.273256	0.42431	1	6243	tags=34%, list=32%, signal=50%
GOBP_REGULATION_OF_GLUCOSE_IMPORT	52	0.363991	1.19479	0.238095	0.424511	1	3577	tags=27%, list=18%, signal=33%
GOBP_REGULATION_OF_NEURON_DIFFERENTIATION	183	0.310996	1.19474	0.239865	0.424369	1	6014	tags=28%, list=30%, signal=40%
GOBP_UDP_N_ACETYLGLUCOSAMINE_METABOLIC_PROCESS	16	0.453661	1.19423	0.27955	0.424914	1	8638	tags=63%, list=44%, signal=111%
GOBP_RESPONSE_TO_HYDROPEROXIDE	17	0.391438	1.19423	0.243682	0.424685	1	5652	tags=47%, list=29%, signal=66%
GOBP_MIDBODY_ABSCISSION	17	0.45907	1.19395	0.274953	0.424899	1	7147	tags=59%, list=36%, signal=92%
GOBP_NEUROTRANSMITTER_RECEPTOR_TRANSPORT	44	0.36792	1.19391	0.246429	0.424707	1	6061	tags=34%, list=31%, signal=49%
GOBP_T_HELPER_CELL_LINEAGE_COMMITMENT	17	0.49731	1.19387	0.310139	0.424542	1	6419	tags=59%, list=32%, signal=87%
GOBP_DIOL_METABOLIC_PROCESS	25	0.408568	1.19355	0.276923	0.424784	1	6709	tags=48%, list=34%, signal=73%
GOBP_POLYSACCHARIDE_CATABOLIC_PROCESS	26	0.395358	1.19354	0.260628	0.424565	1	7234	tags=38%, list=37%, signal=61%
GOBP_NEGATIVE_REGULATION_OF_NEURON_APOPTOTIC_PROCESS	129	0.324768	1.19348	0.226087	0.424419	1	6768	tags=36%, list=34%, signal=54%
GOBP_REGULATION_OF_SPHINGOLIPID_BIOSYNTHETIC_PROCESS	16	0.427953	1.1934	0.257658	0.424306	1	9047	tags=56%, list=46%, signal=104%
GOBP_REGULATION_OF_PHOSPHATIDYLINOSITOL_3_KINASE_ACTIVITY	53	0.401897	1.19317	0.287619	0.424389	1	5831	tags=36%, list=30%, signal=51%
GOBP_NEGATIVE_REGULATION_OF_TRANSCRIPTION_REGULATORY_REGION_DNA_BINDING	20	0.398719	1.19303	0.248134	0.424388	1	7611	tags=55%, list=39%, signal=89%
GOBP_ALPHA_AMINO_ACID_METABOLIC_PROCESS	175	0.304669	1.19293	0.224956	0.424285	1	4749	tags=26%, list=24%, signal=34%
GOBP_POSITIVE_REGULATION_OF_LEUKOCYTE_PROLIFERATION	144	0.366468	1.19253	0.302412	0.424692	1	8971	tags=57%, list=45%, signal=104%
GOBP_RESPONSE_TO_LEAD_ION	22	0.412881	1.19244	0.238889	0.424594	1	8005	tags=50%, list=41%, signal=84%
GOBP_GOLGI_TO_ENDOSOME_TRANSPORT	15	0.498416	1.19227	0.288889	0.424651	1	6159	tags=60%, list=31%, signal=87%
GOBP_CORPUS_CALLOSUM_DEVELOPMENT	15	0.444221	1.19213	0.268293	0.424625	1	7539	tags=60%, list=38%, signal=97%
GOBP_THIOESTER_BIOSYNTHETIC_PROCESS	50	0.373021	1.1917	0.262664	0.425064	1	8175	tags=56%, list=41%, signal=95%
GOBP_SEGMENTATION	93	0.324761	1.19168	0.243197	0.42486	1	6040	tags=31%, list=31%, signal=45%
GOBP_EMBRYONIC_ORGAN_DEVELOPMENT	407	0.29393	1.19137	0.25	0.425146	1	6271	tags=30%, list=32%, signal=43%
GOBP_HYPEROSMOTIC_RESPONSE	26	0.379318	1.19129	0.236742	0.425048	1	7462	tags=42%, list=38%, signal=68%
GOBP_POSITIVE_REGULATION_OF_FILOPODIUM_ASSEMBLY	28	0.425663	1.19114	0.285171	0.425027	1	6120	tags=46%, list=31%, signal=67%
GOBP_RECEPTOR_CLUSTERING	50	0.34534	1.19101	0.229803	0.424989	1	5898	tags=40%, list=30%, signal=57%
GOBP_DEVELOPMENT_OF_PRIMARY_FEMALE_SEXUAL_CHARACTERISTICS	97	0.304365	1.1905	0.233723	0.425572	1	7798	tags=35%, list=39%, signal=58%
GOBP_REGULATION_OF_PROTEIN_LOCALIZATION_TO_CELL_SURFACE	38	0.383706	1.19043	0.251407	0.425471	1	5752	tags=37%, list=29%, signal=52%
GOBP_MOVEMENT_IN_HOST_ENVIRONMENT	171	0.32977	1.1904	0.257713	0.425281	1	6924	tags=40%, list=35%, signal=61%
GOBP_INTEGRIN_MEDIATED_SIGNALING_PATHWAY	100	0.373994	1.18991	0.281426	0.425803	1	7466	tags=48%, list=38%, signal=77%
GOBP_REGULATION_OF_OSTEOCLAST_DIFFERENTIATION	62	0.37515	1.18975	0.284404	0.425822	1	9588	tags=58%, list=49%, signal=112%
GOBP_NEGATIVE_REGULATION_OF_VIRAL_GENOME_REPLICATION	50	0.425177	1.18974	0.312245	0.425612	1	9128	tags=62%, list=46%, signal=115%
GOBP_AUTOPHAGY_OF_MITOCHONDRION	71	0.382319	1.18954	0.294227	0.425683	1	7142	tags=49%, list=36%, signal=77%
GOBP_ACIDIC_AMINO_ACID_TRANSPORT	66	0.338267	1.18934	0.247475	0.42576	1	8181	tags=47%, list=41%, signal=80%
GOBP_NEGATIVE_REGULATION_OF_I_KAPPAB_KINASE_NF_KAPPAB_SIGNALING	43	0.400766	1.1893	0.281008	0.425585	1	8837	tags=63%, list=45%, signal=113%
GOBP_REGULATION_OF_NEURON_PROJECTION_DEVELOPMENT	408	0.319289	1.18921	0.263345	0.425503	1	8440	tags=45%, list=43%, signal=77%
GOBP_POSITIVE_REGULATION_OF_MULTI_ORGANISM_PROCESS	19	0.421723	1.18896	0.283636	0.425694	1	9276	tags=68%, list=47%, signal=129%
GOBP_ENDOPLASMIC_RETICULUM_UNFOLDED_PROTEIN_RESPONSE	121	0.360644	1.1886	0.284133	0.426006	1	7347	tags=45%, list=37%, signal=71%
GOBP_NEGATIVE_REGULATION_OF_PROTEIN_CONTAINING_COMPLEX_ASSEMBLY	129	0.324339	1.18828	0.262697	0.426241	1	8518	tags=50%, list=43%, signal=87%
GOBP_RESPONSE_TO_ETHANOL	126	0.282399	1.18824	0.200622	0.42608	1	7638	tags=34%, list=39%, signal=55%
GOBP_RECEPTOR_CATABOLIC_PROCESS	35	0.401208	1.18773	0.284916	0.426585	1	8653	tags=63%, list=44%, signal=112%
GOBP_MEMBRANE_PROTEIN_INTRACELLULAR_DOMAIN_PROTEOLYSIS	20	0.464682	1.18768	0.294922	0.426459	1	7249	tags=55%, list=37%, signal=87%
GOBP_RESPONSE_TO_DSRNA	52	0.346805	1.18738	0.243682	0.426685	1	4768	tags=25%, list=24%, signal=33%
GOBP_RESPONSE_TO_MURAMYL_DIPEPTIDE	18	0.468058	1.1873	0.303327	0.426576	1	7190	tags=56%, list=36%, signal=87%
GOBP_INTERMEMBRANE_LIPID_TRANSFER	42	0.355123	1.18721	0.215613	0.426496	1	8461	tags=48%, list=43%, signal=83%
GOBP_TRANSCYTOSIS	20	0.408504	1.18638	0.227184	0.427588	1	2891	tags=30%, list=15%, signal=35%
GOBP_NATURAL_KILLER_CELL_DIFFERENTIATION	18	0.43903	1.18587	0.289017	0.428123	1	5094	tags=39%, list=26%, signal=52%
GOBP_POSITIVE_REGULATION_OF_TRANSMEMBRANE_RECEPTOR_PROTEIN_SERINE_THREONINE_KINASE_SIGNALING_PATHWAY	101	0.326148	1.18533	0.237077	0.428711	1	6429	tags=36%, list=33%, signal=53%
GOBP_RESPONSE_TO_TOXIC_SUBSTANCE	223	0.268909	1.18504	0.191654	0.428917	1	3910	tags=17%, list=20%, signal=22%
GOBP_SEGMENT_SPECIFICATION	17	0.417838	1.1841	0.273897	0.43015	1	4925	tags=29%, list=25%, signal=39%
GOBP_CARBOHYDRATE_PHOSPHORYLATION	22	0.417103	1.18389	0.266284	0.430232	1	6130	tags=41%, list=31%, signal=59%
GOBP_SPINAL_CORD_PATTERNING	19	0.416699	1.18357	0.256184	0.430467	1	9544	tags=58%, list=48%, signal=112%
GOBP_SYNAPSE_MATURATION	23	0.389114	1.18322	0.243056	0.430801	1	369	tags=9%, list=2%, signal=9%
GOBP_MAINTENANCE_OF_LOCATION	306	0.308534	1.18311	0.256781	0.430747	1	7800	tags=42%, list=39%, signal=68%
GOBP_LIPID_DROPLET_ORGANIZATION	26	0.382527	1.18293	0.268468	0.430807	1	7303	tags=46%, list=37%, signal=73%
GOBP_FATTY_ACID_TRANSMEMBRANE_TRANSPORT	50	0.354527	1.1827	0.246892	0.430939	1	8097	tags=50%, list=41%, signal=85%
GOBP_REGULATION_OF_B_CELL_RECEPTOR_SIGNALING_PATHWAY	25	0.452364	1.18226	0.295983	0.431374	1	8551	tags=68%, list=43%, signal=120%
GOBP_MYELOID_LEUKOCYTE_DIFFERENTIATION	199	0.336119	1.18219	0.289425	0.431257	1	9996	tags=57%, list=51%, signal=115%
GOBP_POSITIVE_REGULATION_OF_MYELOID_LEUKOCYTE_DIFFERENTIATION	57	0.373626	1.18178	0.29927	0.431661	1	9918	tags=61%, list=50%, signal=123%
GOBP_TOLL_LIKE_RECEPTOR_3_SIGNALING_PATHWAY	19	0.441479	1.18173	0.277666	0.431495	1	4812	tags=42%, list=24%, signal=56%
GOBP_PIGMENT_GRANULE_LOCALIZATION	26	0.413305	1.18163	0.260274	0.431454	1	7446	tags=54%, list=38%, signal=86%
GOBP_POSITIVE_REGULATION_OF_ACTIVATED_T_CELL_PROLIFERATION	24	0.401034	1.18113	0.289668	0.432	1	9271	tags=67%, list=47%, signal=125%
GOBP_NUCLEAR_MIGRATION	19	0.48886	1.18068	0.301619	0.432461	1	6401	tags=58%, list=32%, signal=86%
GOBP_ENDOSOME_TO_LYSOSOME_TRANSPORT	52	0.397028	1.18013	0.324578	0.433085	1	7551	tags=60%, list=38%, signal=96%
GOBP_POSITIVE_REGULATION_OF_HORMONE_SECRETION	121	0.287667	1.18001	0.220911	0.43303	1	8948	tags=42%, list=45%, signal=77%
GOBP_REGULATION_OF_ERAD_PATHWAY	19	0.430988	1.17981	0.31215	0.433103	1	6310	tags=53%, list=32%, signal=77%
GOBP_REGULATION_OF_POLYSACCHARIDE_BIOSYNTHETIC_PROCESS	37	0.370561	1.17927	0.265957	0.433692	1	7465	tags=43%, list=38%, signal=69%
GOBP_ANTERIOR_POSTERIOR_PATTERN_SPECIFICATION	200	0.298774	1.17893	0.246206	0.43397	1	9195	tags=45%, list=47%, signal=83%
GOBP_POSITIVE_REGULATION_OF_AMINO_ACID_TRANSPORT	15	0.434958	1.17878	0.254083	0.433979	1	8181	tags=60%, list=41%, signal=102%
GOBP_CELLULAR_RESPONSE_TO_CARBOHYDRATE_STIMULUS	129	0.292949	1.17868	0.224014	0.433874	1	9014	tags=47%, list=46%, signal=85%
GOBP_CD4_POSITIVE_ALPHA_BETA_T_CELL_ACTIVATION	97	0.369271	1.1786	0.295146	0.433783	1	7429	tags=47%, list=38%, signal=76%
GOBP_REGULATION_OF_MAP_KINASE_ACTIVITY	300	0.309147	1.17836	0.273551	0.433952	1	9736	tags=54%, list=49%, signal=106%
GOBP_NEGATIVE_REGULATION_OF_IMMUNE_EFFECTOR_PROCESS	121	0.355429	1.17808	0.282569	0.434173	1	7607	tags=43%, list=39%, signal=69%
GOBP_T_CELL_SELECTION	48	0.444763	1.17775	0.348697	0.43447	1	6821	tags=56%, list=35%, signal=86%
GOBP_FATTY_ACYL_COA_BIOSYNTHETIC_PROCESS	28	0.379679	1.17738	0.250464	0.434781	1	8175	tags=57%, list=41%, signal=97%
GOBP_GLUCOSAMINE_CONTAINING_COMPOUND_METABOLIC_PROCESS	24	0.395487	1.17737	0.289474	0.434578	1	9233	tags=46%, list=47%, signal=86%
GOBP_RECEPTOR_RECYCLING	29	0.385228	1.17729	0.266417	0.43447	1	9480	tags=66%, list=48%, signal=126%
GOBP_REGULATION_OF_CELL_KILLING	95	0.395253	1.17716	0.330769	0.434452	1	9364	tags=62%, list=47%, signal=118%
GOBP_POSITIVE_REGULATION_OF_CIRCADIAN_RHYTHM	17	0.408775	1.17694	0.246403	0.43454	1	10061	tags=59%, list=51%, signal=120%
GOBP_LIPID_MODIFICATION	249	0.301571	1.17682	0.232804	0.434503	1	6007	tags=33%, list=30%, signal=46%
GOBP_GOLGI_TO_VACUOLE_TRANSPORT	19	0.466836	1.17668	0.2846	0.434503	1	6395	tags=58%, list=32%, signal=86%
GOBP_NEGATIVE_REGULATION_OF_CD4_POSITIVE_ALPHA_BETA_T_CELL_ACTIVATION	31	0.41142	1.17655	0.301811	0.434495	1	6605	tags=48%, list=33%, signal=73%
GOBP_POSITIVE_REGULATION_OF_GLYCOPROTEIN_METABOLIC_PROCESS	25	0.415893	1.17645	0.293333	0.434428	1	8182	tags=64%, list=41%, signal=109%
GOBP_DENDRITIC_CELL_CHEMOTAXIS	24	0.447998	1.17606	0.305389	0.434835	1	8679	tags=67%, list=44%, signal=119%
GOBP_RESPONSE_TO_CORTICOSTEROID	151	0.304042	1.17589	0.261157	0.43483	1	1426	tags=11%, list=7%, signal=11%
GOBP_SPHINGOID_METABOLIC_PROCESS	19	0.423432	1.17549	0.295858	0.435232	1	8665	tags=63%, list=44%, signal=112%
GOBP_GLANDULAR_EPITHELIAL_CELL_DIFFERENTIATION	46	0.340112	1.17532	0.243902	0.435281	1	9400	tags=59%, list=48%, signal=112%
GOBP_CELLULAR_RESPONSE_TO_VITAMIN	29	0.400958	1.17528	0.278899	0.435113	1	3706	tags=24%, list=19%, signal=30%
GOBP_REGULATION_OF_CYTOPLASMIC_TRANSPORT	24	0.458208	1.17528	0.33004	0.434889	1	9903	tags=88%, list=50%, signal=175%
GOBP_DECIDUALIZATION	20	0.403526	1.17506	0.258979	0.434997	1	4907	tags=30%, list=25%, signal=40%
GOBP_POSITIVE_REGULATION_OF_B_CELL_ACTIVATION	72	0.369862	1.17476	0.312741	0.435179	1	4729	tags=33%, list=24%, signal=44%
GOBP_REGULATION_OF_SUPRAMOLECULAR_FIBER_ORGANIZATION	340	0.316688	1.17473	0.261596	0.435002	1	8115	tags=47%, list=41%, signal=78%
GOBP_T_HELPER_1_TYPE_IMMUNE_RESPONSE	41	0.405464	1.17465	0.308285	0.434899	1	6605	tags=44%, list=33%, signal=66%
GOBP_INOSITOL_PHOSPHATE_METABOLIC_PROCESS	69	0.338488	1.17464	0.28051	0.434687	1	7856	tags=46%, list=40%, signal=77%
GOBP_ACTIVATION_OF_MAPK_ACTIVITY	150	0.31498	1.17386	0.288641	0.435652	1	9559	tags=55%, list=48%, signal=106%
GOBP_ESTABLISHMENT_OF_PIGMENT_GRANULE_LOCALIZATION	24	0.411302	1.1738	0.283203	0.435514	1	7446	tags=54%, list=38%, signal=87%
GOBP_POSITIVE_REGULATION_OF_EXOCYTOSIS	84	0.327512	1.17344	0.253497	0.435846	1	7647	tags=44%, list=39%, signal=72%
GOBP_CELLULAR_GLUCOSE_HOMEOSTASIS	135	0.292851	1.1724	0.233696	0.437204	1	9076	tags=46%, list=46%, signal=84%
GOBP_RESPONSE_TO_CARBOHYDRATE	209	0.280649	1.17226	0.215017	0.437207	1	7638	tags=37%, list=39%, signal=59%
GOBP_NEGATIVE_REGULATION_OF_LEUKOCYTE_APOPTOTIC_PROCESS	44	0.380966	1.17146	0.302632	0.438243	1	6459	tags=36%, list=33%, signal=54%
GOBP_POSITIVE_REGULATION_OF_CD4_POSITIVE_ALPHA_BETA_T_CELL_ACTIVATION	37	0.424873	1.17105	0.346591	0.438648	1	6809	tags=49%, list=34%, signal=74%
GOBP_CYTOCHROME_COMPLEX_ASSEMBLY	35	0.438235	1.17099	0.332681	0.438499	1	6038	tags=51%, list=31%, signal=74%
GOBP_REGULATION_OF_PLATELET_ACTIVATION	34	0.407272	1.17012	0.29128	0.439626	1	6053	tags=35%, list=31%, signal=51%
GOBP_REGULATION_OF_GRANULOCYTE_DIFFERENTIATION	15	0.454217	1.16975	0.269006	0.440014	1	7910	tags=53%, list=40%, signal=89%
GOBP_POSITIVE_REGULATION_OF_MYELOID_LEUKOCYTE_MEDIATED_IMMUNITY	17	0.450414	1.16943	0.282651	0.440254	1	6490	tags=47%, list=33%, signal=70%
GOBP_CEREBELLAR_CORTEX_DEVELOPMENT	42	0.352531	1.16932	0.268503	0.440206	1	5032	tags=29%, list=25%, signal=38%
GOBP_REGULATION_OF_CAMP_DEPENDENT_PROTEIN_KINASE_ACTIVITY	20	0.394548	1.16923	0.281609	0.440135	1	7335	tags=55%, list=37%, signal=87%
GOBP_NEGATIVE_REGULATION_OF_NERVOUS_SYSTEM_DEVELOPMENT	132	0.308333	1.16922	0.238832	0.439918	1	7539	tags=40%, list=38%, signal=64%
GOBP_MODIFIED_AMINO_ACID_TRANSPORT	29	0.370447	1.16915	0.296703	0.439801	1	3293	tags=24%, list=17%, signal=29%
GOBP_POSITIVE_REGULATION_OF_MAP_KINASE_ACTIVITY	225	0.314445	1.16904	0.301645	0.439736	1	9736	tags=56%, list=49%, signal=110%
GOBP_HEMOGLOBIN_METABOLIC_PROCESS	16	0.410495	1.16886	0.260377	0.439821	1	8186	tags=50%, list=41%, signal=85%
GOBP_REGULATION_OF_POLYSACCHARIDE_METABOLIC_PROCESS	43	0.341215	1.16782	0.274783	0.441175	1	9588	tags=53%, list=49%, signal=104%
GOBP_MAINTENANCE_OF_PROTEIN_LOCATION	92	0.330472	1.16747	0.278985	0.441462	1	8769	tags=55%, list=44%, signal=99%
GOBP_RUFFLE_ORGANIZATION	52	0.350099	1.16702	0.278293	0.44187	1	9014	tags=54%, list=46%, signal=99%
GOBP_PHOSPHATIDYLINOSITOL_DEPHOSPHORYLATION	29	0.427057	1.16698	0.352826	0.441703	1	7856	tags=59%, list=40%, signal=97%
GOBP_POSITIVE_REGULATION_OF_STEROID_BIOSYNTHETIC_PROCESS	17	0.403531	1.16621	0.264493	0.442705	1	2994	tags=24%, list=15%, signal=28%
GOBP_NEURON_PROJECTION_ARBORIZATION	28	0.403614	1.16583	0.277064	0.443039	1	8208	tags=54%, list=42%, signal=92%
GOBP_CELLULAR_RESPONSE_TO_CORTICOSTEROID_STIMULUS	60	0.341842	1.16515	0.286726	0.443861	1	2882	tags=18%, list=15%, signal=21%
GOBP_REGULATION_OF_LIPID_TRANSPORT	135	0.28339	1.16494	0.237864	0.443947	1	7734	tags=35%, list=39%, signal=57%
GOBP_ARF_PROTEIN_SIGNAL_TRANSDUCTION	18	0.436864	1.1649	0.316288	0.443762	1	6193	tags=44%, list=31%, signal=65%
GOBP_HINDBRAIN_MORPHOGENESIS	40	0.372437	1.1647	0.299465	0.443866	1	8319	tags=48%, list=42%, signal=82%
GOBP_GLIAL_CELL_PROLIFERATION	44	0.363599	1.16468	0.288679	0.443671	1	5480	tags=34%, list=28%, signal=47%
GOBP_MAINTENANCE_OF_SYNAPSE_STRUCTURE	15	0.427392	1.16467	0.30695	0.44347	1	8028	tags=60%, list=41%, signal=101%
GOBP_NEGATIVE_REGULATION_OF_AXON_EXTENSION_INVOLVED_IN_AXON_GUIDANCE	26	0.403311	1.16456	0.301075	0.443405	1	5624	tags=35%, list=28%, signal=48%
GOBP_RESPONSE_TO_HYPEROXIA	22	0.392178	1.16456	0.268836	0.443179	1	1596	tags=18%, list=8%, signal=20%
GOBP_ORGANOPHOSPHATE_ESTER_TRANSPORT	126	0.300435	1.16372	0.231434	0.44425	1	9781	tags=51%, list=50%, signal=100%
GOBP_TRIGLYCERIDE_BIOSYNTHETIC_PROCESS	36	0.357005	1.16358	0.290676	0.444208	1	6881	tags=36%, list=35%, signal=55%
GOBP_POSITIVE_REGULATION_OF_ENDOCYTOSIS	96	0.324384	1.16331	0.284153	0.444411	1	6506	tags=36%, list=33%, signal=54%
GOBP_NEGATIVE_REGULATION_OF_LIPID_METABOLIC_PROCESS	87	0.309771	1.16246	0.246998	0.445556	1	8346	tags=41%, list=42%, signal=71%
GOBP_POSITIVE_REGULATION_OF_DNA_BINDING	52	0.32951	1.16222	0.274686	0.445663	1	9024	tags=52%, list=46%, signal=95%
GOBP_N_ACETYLGLUCOSAMINE_METABOLIC_PROCESS	17	0.432425	1.16214	0.280079	0.445557	1	8638	tags=53%, list=44%, signal=94%
GOBP_NEGATIVE_REGULATION_OF_DEVELOPMENTAL_GROWTH	99	0.327217	1.16161	0.29361	0.446186	1	5890	tags=33%, list=30%, signal=47%
GOBP_NUCLEOTIDE_SUGAR_BIOSYNTHETIC_PROCESS	21	0.42416	1.16107	0.326679	0.4468	1	7667	tags=57%, list=39%, signal=93%
GOBP_SYNAPTIC_VESICLE_EXOCYTOSIS	102	0.328668	1.1609	0.282648	0.446832	1	7711	tags=42%, list=39%, signal=69%
GOBP_PROTEIN_N_LINKED_GLYCOSYLATION	74	0.371811	1.16075	0.329137	0.446842	1	8720	tags=54%, list=44%, signal=96%
GOBP_MAGNESIUM_ION_TRANSPORT	17	0.478969	1.16043	0.325397	0.447108	1	8572	tags=71%, list=43%, signal=125%
GOBP_ANATOMICAL_STRUCTURE_REGRESSION	17	0.412231	1.1602	0.296429	0.447258	1	7276	tags=41%, list=37%, signal=65%
GOBP_MITOTIC_CELL_CYCLE_ARREST	16	0.415178	1.16011	0.262357	0.44718	1	5147	tags=38%, list=26%, signal=51%
GOBP_REGULATION_OF_NUCLEAR_TRANSCRIBED_MRNA_CATABOLIC_PROCESS_DEADENYLATION_DEPENDENT_DECAY	15	0.462208	1.15996	0.280943	0.447172	1	4407	tags=33%, list=22%, signal=43%
GOBP_LEUKOCYTE_ADHESION_TO_VASCULAR_ENDOTHELIAL_CELL	44	0.394815	1.15966	0.284024	0.447387	1	5865	tags=41%, list=30%, signal=58%
GOBP_GLANDULAR_EPITHELIAL_CELL_DEVELOPMENT	24	0.387023	1.15956	0.279492	0.447307	1	9208	tags=58%, list=47%, signal=109%
GOBP_CELLULAR_RESPONSE_TO_AMYLOID_BETA	35	0.389379	1.15945	0.320826	0.447231	1	7539	tags=46%, list=38%, signal=74%
GOBP_PARAXIAL_MESODERM_DEVELOPMENT	17	0.430285	1.15921	0.308571	0.447388	1	6160	tags=53%, list=31%, signal=77%
GOBP_POSITIVE_REGULATION_OF_NATURAL_KILLER_CELL_MEDIATED_IMMUNITY	30	0.432355	1.15866	0.335953	0.448015	1	9322	tags=67%, list=47%, signal=126%
GOBP_PATTERN_SPECIFICATION_PROCESS	419	0.279863	1.15854	0.282927	0.447963	1	8802	tags=43%, list=45%, signal=77%
GOBP_TRANSFORMING_GROWTH_FACTOR_BETA_RECEPTOR_SIGNALING_PATHWAY	190	0.332293	1.15852	0.294444	0.447767	1	7593	tags=47%, list=38%, signal=75%
GOBP_PROTEIN_LOCALIZATION_TO_POSTSYNAPSE	42	0.356627	1.15845	0.297248	0.447646	1	8518	tags=43%, list=43%, signal=75%
GOBP_ANION_HOMEOSTASIS	34	0.343355	1.15822	0.284229	0.447793	1	8739	tags=47%, list=44%, signal=84%
GOBP_EMBRYONIC_SKELETAL_SYSTEM_MORPHOGENESIS	89	0.32279	1.15817	0.275042	0.447624	1	9195	tags=46%, list=47%, signal=86%
GOBP_REGULATION_OF_T_HELPER_17_TYPE_IMMUNE_RESPONSE	21	0.450598	1.15721	0.335907	0.448895	1	9271	tags=71%, list=47%, signal=134%
GOBP_TRANSLATIONAL_TERMINATION	103	0.453706	1.15718	0.362173	0.448728	1	4576	tags=42%, list=23%, signal=54%
GOBP_REGULATION_OF_PEPTIDYL_TYROSINE_PHOSPHORYLATION	250	0.318158	1.15689	0.297641	0.448958	1	9283	tags=50%, list=47%, signal=94%
GOBP_REGULATION_OF_KETONE_BIOSYNTHETIC_PROCESS	17	0.41439	1.15611	0.310409	0.449898	1	4365	tags=35%, list=22%, signal=45%
GOBP_NEGATIVE_REGULATION_OF_OSTEOCLAST_DIFFERENTIATION	27	0.402291	1.1561	0.298872	0.4497	1	9428	tags=56%, list=48%, signal=106%
GOBP_ISOPRENOID_BIOSYNTHETIC_PROCESS	27	0.392938	1.15559	0.298561	0.450301	1	6964	tags=44%, list=35%, signal=69%
GOBP_ATP_TRANSPORT	17	0.383759	1.15524	0.286232	0.450559	1	5662	tags=35%, list=29%, signal=49%
GOBP_L_ALPHA_AMINO_ACID_TRANSMEMBRANE_TRANSPORT	58	0.329603	1.15524	0.281834	0.450337	1	7860	tags=41%, list=40%, signal=69%
GOBP_ORGANIC_ACID_TRANSMEMBRANE_TRANSPORT	149	0.292796	1.15522	0.261231	0.450132	1	8208	tags=42%, list=42%, signal=72%
GOBP_BONE_CELL_DEVELOPMENT	31	0.407484	1.15498	0.327586	0.450263	1	8786	tags=55%, list=44%, signal=99%
GOBP_POSITIVE_REGULATION_OF_NEURON_DIFFERENTIATION	91	0.314374	1.15477	0.265101	0.450349	1	6014	tags=29%, list=30%, signal=41%
GOBP_INTERFERON_GAMMA_MEDIATED_SIGNALING_PATHWAY	88	0.38215	1.15462	0.319846	0.450374	1	9093	tags=58%, list=46%, signal=107%
GOBP_POSITIVE_REGULATION_OF_CELL_KILLING	60	0.412482	1.1546	0.351889	0.450167	1	9322	tags=68%, list=47%, signal=129%
GOBP_EMBRYONIC_HEMOPOIESIS	23	0.40763	1.15445	0.315582	0.450164	1	6486	tags=35%, list=33%, signal=52%
GOBP_REGULATION_OF_RESPONSE_TO_REACTIVE_OXYGEN_SPECIES	27	0.382936	1.15424	0.323583	0.450265	1	5334	tags=33%, list=27%, signal=46%
GOBP_ESTABLISHMENT_OF_EPITHELIAL_CELL_POLARITY	29	0.385155	1.15395	0.311445	0.450505	1	9903	tags=72%, list=50%, signal=145%
GOBP_REGULATION_OF_LIPOPOLYSACCHARIDE_MEDIATED_SIGNALING_PATHWAY	24	0.386912	1.1538	0.30855	0.450513	1	8844	tags=50%, list=45%, signal=90%
GOBP_POSITIVE_REGULATION_OF_PROTEIN_TYROSINE_KINASE_ACTIVITY	58	0.364004	1.15376	0.315985	0.450365	1	6924	tags=38%, list=35%, signal=58%
[truncated: 2,011 more rows]
